# Supplementary material
Source: publisher figshare collection journal article supplement (https://acs.figshare.com/ndownloader/files/5176450)
Supplement: Supplementary file 1 [file 5176450]

  
data_monoabs 
  
_audit_creation_method            SHELXL-97 
_chemical_name_systematic 
; 
 ? 
; 
_chemical_name_common              1�(PF6)2�3C6H6 
_chemical_melting_point           ? 
_chemical_formula_moiety          ? 
_chemical_formula_sum 
 'C126 H87 Au F12 N6 P8 Pd Tl' 
_chemical_formula_weight          2668.51 
  
loop_ 
 _atom_type_symbol 
 _atom_type_description 
 _atom_type_scat_dispersion_real 
 _atom_type_scat_dispersion_imag 
 _atom_type_scat_source 
 'C'  'C'   0.0033   0.0016 
 'International Tables Vol C Tables 4.2.6.8 and 6.1.1.4' 
 'H'  'H'   0.0000   0.0000 
 'International Tables Vol C Tables 4.2.6.8 and 6.1.1.4' 
 'N'  'N'   0.0061   0.0033 
 'International Tables Vol C Tables 4.2.6.8 and 6.1.1.4' 
 'F'  'F'   0.0171   0.0103 
 'International Tables Vol C Tables 4.2.6.8 and 6.1.1.4' 
 'P'  'P'   0.1023   0.0942 
 'International Tables Vol C Tables 4.2.6.8 and 6.1.1.4' 
 'Pd'  'Pd'  -0.9988   1.0072 
 'International Tables Vol C Tables 4.2.6.8 and 6.1.1.4' 
 'Au'  'Au'  -2.0133   8.8022 
 'International Tables Vol C Tables 4.2.6.8 and 6.1.1.4' 
 'Tl'  'Tl'  -2.8358   9.6688 
 'International Tables Vol C Tables 4.2.6.8 and 6.1.1.4' 
  
_symmetry_cell_setting            Monoclinic 
_symmetry_space_group_name_H-M    C2/c 
  
loop_ 
 _symmetry_equiv_pos_as_xyz 
 'x, y, z' 
 '-x, y, -z+1/2' 
 'x+1/2, y+1/2, z' 
 '-x+1/2, y+1/2, -z+1/2' 
 '-x, -y, -z' 
 'x, -y, z-1/2' 
 '-x+1/2, -y+1/2, -z' 
 'x+1/2, -y+1/2, z-1/2' 
  
_cell_length_a                    53.796(3) 
_cell_length_b                    15.2193(7) 
_cell_length_c                    29.8943(13) 
_cell_angle_alpha                 90.00 
_cell_angle_beta                  109.9090(10) 
_cell_angle_gamma                 90.00 
_cell_volume                      23012.6(18) 
_cell_formula_units_Z             8 
_cell_measurement_temperature     123(2) 
_cell_measurement_reflns_used     ? 
_cell_measurement_theta_min       ? 
_cell_measurement_theta_max       ? 
  
_exptl_crystal_description        plate 
_exptl_crystal_colour             red 
_exptl_crystal_size_max           0.47 
_exptl_crystal_size_mid           0.43 
_exptl_crystal_size_min           0.16 
_exptl_crystal_density_meas       0 
_exptl_crystal_density_diffrn     1.540 
_exptl_crystal_density_method     'not measured' 
_exptl_crystal_F_000              10552 
_exptl_absorpt_coefficient_mu     3.006 
_exptl_absorpt_correction_type    SADABS 
_exptl_absorpt_correction_T_min   0.3317 
_exptl_absorpt_correction_T_max   0.6448 
_exptl_absorpt_process_details    ? 
  
_exptl_special_details 
; 
 ? 
; 
  
_diffrn_ambient_temperature       123(2) 
_diffrn_radiation_wavelength      0.71073 
_diffrn_radiation_type            MoK\a 
_diffrn_radiation_source          'fine-focus sealed tube' 
_diffrn_radiation_monochromator   graphite 
_diffrn_measurement_device_type   'CCD area detector' 
_diffrn_measurement_method        'phi and omega scans' 
_diffrn_detector_area_resol_mean  ? 
_diffrn_standards_number          ? 
_diffrn_standards_interval_count  ? 
_diffrn_standards_interval_time   ? 
_diffrn_standards_decay_%         ? 
_diffrn_reflns_number             58869 
_diffrn_reflns_av_R_equivalents   0.0261 
_diffrn_reflns_av_sigmaI/netI     0.0299 
_diffrn_reflns_limit_h_min        -62 
_diffrn_reflns_limit_h_max        63 
_diffrn_reflns_limit_k_min        -18 
_diffrn_reflns_limit_k_max        18 
_diffrn_reflns_limit_l_min        -33 
_diffrn_reflns_limit_l_max        35 
_diffrn_reflns_theta_min          1.40 
_diffrn_reflns_theta_max          25.00 
_reflns_number_total              20233 
_reflns_number_gt                 17908 
_reflns_threshold_expression      >2sigma(I) 
  
_computing_data_collection        'Bruker SMART' 
_computing_cell_refinement        'Bruker SMART' 
_computing_data_reduction         'Bruker SAINT' 
_computing_structure_solution     'SHELXS-97 (Sheldrick, 1990)' 
_computing_structure_refinement   'SHELXL-97 (Sheldrick, 1997)' 
_computing_molecular_graphics     'Bruker SHELXTL' 
_computing_publication_material   'Bruker SHELXTL' 
  
_refine_special_details 
; 
 Refinement of F^2^ against ALL reflections.  The weighted R-factor wR and 
 goodness of fit S are based on F^2^, conventional R-factors R are based 
 on F, with F set to zero for negative F^2^. The threshold expression of 
 F^2^ > 2sigma(F^2^) is used only for calculating R-factors(gt) etc. and is 
 not relevant to the choice of reflections for refinement.  R-factors based 
 on F^2^ are statistically about twice as large as those based on F, and R- 
 factors based on ALL data will be even larger. 
; 
  
_refine_ls_structure_factor_coef  Fsqd 
_refine_ls_matrix_type            full 
_refine_ls_weighting_scheme       calc 
_refine_ls_weighting_details 
 'calc w=1/[\s^2^(Fo^2^)+(0.0526P)^2^+156.0000P] where P=(Fo^2^+2Fc^2^)/3' 
_atom_sites_solution_primary      direct 
_atom_sites_solution_secondary    difmap 
_atom_sites_solution_hydrogens    geom 
_refine_ls_hydrogen_treatment     mixed 
_refine_ls_extinction_method      none 
_refine_ls_extinction_coef        ? 
_refine_ls_number_reflns          20233 
_refine_ls_number_parameters      1395 
_refine_ls_number_restraints      16 
_refine_ls_R_factor_all           0.0554 
_refine_ls_R_factor_gt            0.0493 
_refine_ls_wR_factor_ref          0.1436 
_refine_ls_wR_factor_gt           0.1409 
_refine_ls_goodness_of_fit_ref    1.415 
_refine_ls_restrained_S_all       1.415 
_refine_ls_shift/su_max           0.131 
_refine_ls_shift/su_mean          0.001 
  
loop_ 
 _atom_site_label 
 _atom_site_type_symbol 
 _atom_site_fract_x 
 _atom_site_fract_y 
 _atom_site_fract_z 
 _atom_site_U_iso_or_equiv 
 _atom_site_adp_type 
 _atom_site_occupancy 
 _atom_site_symmetry_multiplicity 
 _atom_site_calc_flag 
 _atom_site_refinement_flags 
 _atom_site_disorder_assembly 
 _atom_site_disorder_group 
Au1 Au 0.14905(19) 0.3343(6) 0.9449(4) 0.0203(3) Uani 0.4278(18) 1 d PD . . 
Au2 Au 0.10623(11) 0.6151(3) 1.01999(19) 0.0200(3) Uani 0.5722(18) 1 d PD . . 
Pd1 Pd 0.1048(3) 0.6099(10) 1.0170(5) 0.0200(3) Uani 0.4278(18) 1 d PD . . 
Pd2 Pd 0.1491(3) 0.3391(9) 0.9457(5) 0.0203(3) Uani 0.5722(18) 1 d PD . . 
Tl1 Tl 0.125789(6) 0.47332(2) 0.978570(10) 0.04193(9) Uani 1 1 d D . . 
P1 P 0.11440(3) 0.30698(11) 0.87463(5) 0.0237(3) Uani 1 1 d . . . 
P2 P 0.09612(3) 0.51982(10) 1.07322(5) 0.0234(3) Uani 1 1 d . . . 
P3 P 0.18399(3) 0.42464(10) 0.94147(5) 0.0212(3) Uani 1 1 d . . . 
P4 P 0.06957(3) 0.64395(10) 0.95000(5) 0.0213(3) Uani 1 1 d . . . 
P5 P 0.15196(3) 0.24239(10) 1.00914(5) 0.0218(3) Uani 1 1 d . . . 
P6 P 0.14335(3) 0.70296(10) 1.03981(6) 0.0255(3) Uani 1 1 d . . . 
P7 P 0.04608(5) 0.98533(14) 0.13952(8) 0.0476(5) Uani 1 1 d . . . 
P8 P 0.30578(5) 0.61088(19) 0.24598(15) 0.0872(11) Uani 1 1 d . . . 
N1 N 0.08200(10) 0.3182(3) 0.92552(17) 0.0229(11) Uani 1 1 d . . . 
N2 N 0.07614(10) 0.3961(3) 1.00583(17) 0.0234(11) Uani 1 1 d . . . 
N3 N 0.14928(10) 0.5522(3) 0.90006(17) 0.0218(10) Uani 1 1 d . . . 
N4 N 0.10273(9) 0.6309(3) 0.90044(17) 0.0211(10) Uani 1 1 d . . . 
N5 N 0.17212(9) 0.3768(3) 1.06828(17) 0.0220(10) Uani 1 1 d . . . 
N6 N 0.17192(10) 0.5586(3) 1.07549(17) 0.0233(11) Uani 1 1 d . . . 
F1 F 0.04811(13) 1.0711(4) 0.1112(2) 0.0826(18) Uani 1 1 d . . . 
F2 F 0.0635(3) 0.9399(7) 0.1164(4) 0.200(7) Uani 1 1 d . . . 
F3 F 0.0435(3) 0.9025(5) 0.1679(4) 0.175(5) Uani 1 1 d . . . 
F4 F 0.0279(2) 1.0337(6) 0.1604(5) 0.189(6) Uani 1 1 d . . . 
F5 F 0.0237(3) 0.9580(10) 0.0966(5) 0.244(8) Uani 1 1 d . . . 
F6 F 0.0697(2) 1.0138(9) 0.1807(3) 0.192(6) Uani 1 1 d . . . 
F7 F 0.2898(3) 0.6098(7) 0.1928(3) 0.176(5) Uani 1 1 d . . . 
F8 F 0.28006(14) 0.6408(6) 0.2531(3) 0.123(3) Uani 1 1 d . . . 
F9 F 0.3199(2) 0.6207(7) 0.3043(4) 0.158(4) Uani 1 1 d . . . 
F10 F 0.33267(16) 0.5793(8) 0.2469(6) 0.224(7) Uani 1 1 d . . . 
F11 F 0.2975(2) 0.5152(6) 0.2499(5) 0.195(6) Uani 1 1 d . . . 
F12 F 0.31404(15) 0.7083(5) 0.2441(3) 0.111(3) Uani 1 1 d . . . 
C1 C 0.08398(12) 0.2801(4) 0.8869(2) 0.0249(13) Uani 1 1 d . . . 
C2 C 0.06548(12) 0.2191(4) 0.8586(2) 0.0289(14) Uani 1 1 d . . . 
H2A H 0.0673 0.1958 0.8304 0.035 Uiso 1 1 calc R . . 
C3 C 0.04498(13) 0.1945(5) 0.8729(2) 0.0311(14) Uani 1 1 d . . . 
H3A H 0.0324 0.1527 0.8549 0.037 Uiso 1 1 calc R . . 
C4 C 0.04249(12) 0.2310(4) 0.9141(2) 0.0289(14) Uani 1 1 d . . . 
C5 C 0.06140(12) 0.2941(4) 0.9393(2) 0.0240(13) Uani 1 1 d . . . 
C6 C 0.05908(12) 0.3328(4) 0.9823(2) 0.0251(13) Uani 1 1 d . . . 
C7 C 0.03833(13) 0.3025(4) 0.9980(2) 0.0304(14) Uani 1 1 d . . . 
C8 C 0.03582(14) 0.3408(5) 1.0387(3) 0.0362(16) Uani 1 1 d . . . 
H8A H 0.0224 0.3217 1.0504 0.043 Uiso 1 1 calc R . . 
C9 C 0.05281(14) 0.4057(5) 1.0615(2) 0.0347(16) Uani 1 1 d . . . 
H9A H 0.0510 0.4331 1.0888 0.042 Uiso 1 1 calc R . . 
C10 C 0.07304(13) 0.4318(4) 1.0445(2) 0.0265(13) Uani 1 1 d . . . 
C11 C 0.02198(13) 0.2030(5) 0.9318(3) 0.0345(15) Uani 1 1 d . . . 
H11A H 0.0096 0.1599 0.9148 0.041 Uiso 1 1 calc R . . 
C12 C 0.02013(13) 0.2367(5) 0.9717(2) 0.0338(15) Uani 1 1 d . . . 
H12A H 0.0066 0.2168 0.9829 0.041 Uiso 1 1 calc R . . 
C13 C 0.17187(12) 0.5162(4) 0.9000(2) 0.0226(12) Uani 1 1 d . . . 
C14 C 0.18531(12) 0.5455(4) 0.8695(2) 0.0273(14) Uani 1 1 d . . . 
H14A H 0.2016 0.5195 0.8707 0.033 Uiso 1 1 calc R . . 
C15 C 0.17449(13) 0.6119(4) 0.8382(2) 0.0299(14) Uani 1 1 d . . . 
H15A H 0.1833 0.6327 0.8176 0.036 Uiso 1 1 calc R . . 
C16 C 0.15043(12) 0.6493(4) 0.8366(2) 0.0245(13) Uani 1 1 d . . . 
C17 C 0.13839(12) 0.6169(4) 0.8685(2) 0.0222(12) Uani 1 1 d . . . 
C18 C 0.11324(12) 0.6545(4) 0.8670(2) 0.0226(12) Uani 1 1 d . . . 
C19 C 0.10104(13) 0.7182(4) 0.8318(2) 0.0273(13) Uani 1 1 d . . . 
C20 C 0.07681(13) 0.7525(4) 0.8301(2) 0.0298(14) Uani 1 1 d . . . 
H20A H 0.0677 0.7927 0.8057 0.036 Uiso 1 1 calc R . . 
C21 C 0.06601(13) 0.7282(4) 0.8637(2) 0.0287(14) Uani 1 1 d . . . 
H21A H 0.0495 0.7510 0.8632 0.034 Uiso 1 1 calc R . . 
C22 C 0.08014(11) 0.6687(4) 0.8988(2) 0.0217(12) Uani 1 1 d . . . 
C23 C 0.13769(13) 0.7163(4) 0.8024(2) 0.0309(14) Uani 1 1 d . . . 
H23A H 0.1462 0.7382 0.7817 0.037 Uiso 1 1 calc R . . 
C24 C 0.11405(13) 0.7480(4) 0.7995(2) 0.0317(15) Uani 1 1 d . . . 
H24A H 0.1057 0.7906 0.7760 0.038 Uiso 1 1 calc R . . 
C25 C 0.17191(12) 0.2893(4) 1.0668(2) 0.0233(12) Uani 1 1 d . . . 
C26 C 0.18718(12) 0.2365(4) 1.1047(2) 0.0274(13) Uani 1 1 d . . . 
H26A H 0.1854 0.1743 1.1032 0.033 Uiso 1 1 calc R . . 
C27 C 0.20453(13) 0.2763(4) 1.1435(2) 0.0296(14) Uani 1 1 d . . . 
H27A H 0.2149 0.2421 1.1698 0.036 Uiso 1 1 calc R . . 
C28 C 0.20708(12) 0.3683(4) 1.1447(2) 0.0269(14) Uani 1 1 d . . . 
C29 C 0.18938(11) 0.4161(4) 1.1069(2) 0.0221(12) Uani 1 1 d . . . 
C30 C 0.19075(12) 0.5111(4) 1.1086(2) 0.0240(13) Uani 1 1 d . . . 
C31 C 0.21142(12) 0.5524(4) 1.1456(2) 0.0281(14) Uani 1 1 d . . . 
C32 C 0.21303(13) 0.6436(5) 1.1461(2) 0.0334(15) Uani 1 1 d . . . 
H32A H 0.2273 0.6725 1.1692 0.040 Uiso 1 1 calc R . . 
C33 C 0.19387(14) 0.6915(5) 1.1130(2) 0.0349(15) Uani 1 1 d . . . 
H33A H 0.1946 0.7539 1.1130 0.042 Uiso 1 1 calc R . . 
C34 C 0.17304(12) 0.6459(4) 1.0790(2) 0.0251(13) Uani 1 1 d . . . 
C35 C 0.22703(13) 0.4118(5) 1.1819(2) 0.0315(15) Uani 1 1 d . . . 
H35A H 0.2387 0.3784 1.2072 0.038 Uiso 1 1 calc R . . 
C36 C 0.22959(13) 0.5002(5) 1.1819(2) 0.0338(15) Uani 1 1 d . . . 
H36A H 0.2436 0.5279 1.2063 0.041 Uiso 1 1 calc R . . 
C37 C 0.12043(13) 0.2118(4) 0.8419(2) 0.0289(14) Uani 1 1 d . . . 
C38 C 0.13958(14) 0.1515(5) 0.8657(3) 0.0372(16) Uani 1 1 d . . . 
H38A H 0.1484 0.1575 0.8990 0.045 Uiso 1 1 calc R . . 
C39 C 0.14607(16) 0.0827(5) 0.8418(3) 0.051(2) Uani 1 1 d . . . 
H39A H 0.1592 0.0418 0.8588 0.061 Uiso 1 1 calc R . . 
C40 C 0.13369(19) 0.0727(6) 0.7938(4) 0.058(3) Uani 1 1 d . . . 
H40A H 0.1385 0.0259 0.7774 0.070 Uiso 1 1 calc R . . 
C41 C 0.11412(18) 0.1313(6) 0.7693(3) 0.052(2) Uani 1 1 d . . . 
H41A H 0.1051 0.1235 0.7362 0.062 Uiso 1 1 calc R . . 
C42 C 0.10768(15) 0.2014(5) 0.7930(2) 0.0389(17) Uani 1 1 d . . . 
H42A H 0.0946 0.2424 0.7760 0.047 Uiso 1 1 calc R . . 
C43 C 0.10422(12) 0.3914(4) 0.8288(2) 0.0262(13) Uani 1 1 d . . . 
C44 C 0.12266(14) 0.4185(5) 0.8077(2) 0.0341(15) Uani 1 1 d . . . 
H44A H 0.1394 0.3903 0.8161 0.041 Uiso 1 1 calc R . . 
C45 C 0.11651(15) 0.4859(5) 0.7748(2) 0.0386(17) Uani 1 1 d . . . 
H45A H 0.1289 0.5030 0.7601 0.046 Uiso 1 1 calc R . . 
C46 C 0.09289(17) 0.5280(5) 0.7632(2) 0.0422(19) Uani 1 1 d . . . 
H46A H 0.0892 0.5756 0.7414 0.051 Uiso 1 1 calc R . . 
C47 C 0.07413(16) 0.5022(5) 0.7831(2) 0.0393(17) Uani 1 1 d . . . 
H47A H 0.0575 0.5313 0.7744 0.047 Uiso 1 1 calc R . . 
C48 C 0.07989(14) 0.4331(5) 0.8158(2) 0.0317(15) Uani 1 1 d . . . 
H48A H 0.0671 0.4147 0.8293 0.038 Uiso 1 1 calc R . . 
C49 C 0.07896(12) 0.5863(4) 1.1050(2) 0.0240(13) Uani 1 1 d . . . 
C50 C 0.06247(13) 0.6545(5) 1.0800(2) 0.0317(15) Uani 1 1 d . . . 
H50A H 0.0586 0.6597 1.0466 0.038 Uiso 1 1 calc R . . 
C51 C 0.05183(13) 0.7138(5) 1.1031(2) 0.0334(15) Uani 1 1 d . . . 
H51A H 0.0408 0.7600 1.0859 0.040 Uiso 1 1 calc R . . 
C52 C 0.05734(14) 0.7056(5) 1.1524(2) 0.0340(15) Uani 1 1 d . . . 
H52A H 0.0506 0.7473 1.1690 0.041 Uiso 1 1 calc R . . 
C53 C 0.07246(14) 0.6372(5) 1.1763(2) 0.0345(15) Uani 1 1 d . . . 
H53A H 0.0754 0.6300 1.2093 0.041 Uiso 1 1 calc R . . 
C54 C 0.08357(13) 0.5778(4) 1.1534(2) 0.0302(14) Uani 1 1 d . . . 
H54A H 0.0943 0.5313 1.1708 0.036 Uiso 1 1 calc R . . 
C55 C 0.12085(13) 0.4628(4) 1.1220(2) 0.0300(15) Uani 1 1 d . . . 
C56 C 0.11879(18) 0.3752(5) 1.1327(2) 0.0449(19) Uani 1 1 d . . . 
H56A H 0.1042 0.3417 1.1133 0.054 Uiso 1 1 calc R . . 
C57 C 0.1376(2) 0.3356(6) 1.1710(3) 0.058(2) Uani 1 1 d . . . 
H57A H 0.1358 0.2757 1.1782 0.070 Uiso 1 1 calc R . . 
C58 C 0.15899(19) 0.3834(7) 1.1984(3) 0.057(3) Uani 1 1 d . . . 
H58A H 0.1722 0.3561 1.2242 0.068 Uiso 1 1 calc R . . 
C59 C 0.16128(15) 0.4712(6) 1.1885(3) 0.048(2) Uani 1 1 d . . . 
H59A H 0.1760 0.5042 1.2079 0.057 Uiso 1 1 calc R . . 
C60 C 0.14237(14) 0.5115(5) 1.1505(2) 0.0379(17) Uani 1 1 d . . . 
H60A H 0.1440 0.5718 1.1439 0.046 Uiso 1 1 calc R . . 
C61 C 0.20493(12) 0.3609(4) 0.9160(2) 0.0241(13) Uani 1 1 d . . . 
C62 C 0.23175(13) 0.3755(5) 0.9277(3) 0.0355(16) Uani 1 1 d . . . 
H62A H 0.2400 0.4219 0.9487 0.043 Uiso 1 1 calc R . . 
C63 C 0.24676(14) 0.3216(5) 0.9084(3) 0.0403(17) Uani 1 1 d . . . 
H63A H 0.2652 0.3320 0.9163 0.048 Uiso 1 1 calc R . . 
C64 C 0.23504(14) 0.2545(5) 0.8786(2) 0.0382(16) Uani 1 1 d . . . 
H64A H 0.2453 0.2179 0.8659 0.046 Uiso 1 1 calc R . . 
C65 C 0.20827(14) 0.2396(5) 0.8667(3) 0.0382(17) Uani 1 1 d . . . 
H65A H 0.2000 0.1934 0.8454 0.046 Uiso 1 1 calc R . . 
C66 C 0.19354(14) 0.2921(5) 0.8858(2) 0.0331(15) Uani 1 1 d . . . 
H66A H 0.1752 0.2809 0.8780 0.040 Uiso 1 1 calc R . . 
C67 C 0.20900(12) 0.4776(4) 0.9923(2) 0.0252(13) Uani 1 1 d . . . 
C68 C 0.21659(13) 0.5644(4) 0.9913(2) 0.0330(15) Uani 1 1 d . . . 
H68A H 0.2084 0.5990 0.9638 0.040 Uiso 1 1 calc R . . 
C69 C 0.23601(14) 0.6014(5) 1.0299(3) 0.0388(17) Uani 1 1 d . . . 
H69A H 0.2408 0.6612 1.0288 0.047 Uiso 1 1 calc R . . 
C70 C 0.24838(13) 0.5521(5) 1.0700(2) 0.0356(16) Uani 1 1 d . . . 
H70A H 0.2616 0.5776 1.0965 0.043 Uiso 1 1 calc R . . 
C71 C 0.24129(13) 0.4653(5) 1.0709(2) 0.0333(15) Uani 1 1 d . . . 
H71A H 0.2499 0.4307 1.0983 0.040 Uiso 1 1 calc R . . 
C72 C 0.22174(12) 0.4276(5) 1.0326(2) 0.0295(14) Uani 1 1 d . . . 
H72A H 0.2171 0.3677 1.0339 0.035 Uiso 1 1 calc R . . 
C73 C 0.05125(12) 0.7419(4) 0.9566(2) 0.0253(13) Uani 1 1 d . . . 
C74 C 0.02501(13) 0.7558(4) 0.9291(2) 0.0321(15) Uani 1 1 d . . . 
H74A H 0.0160 0.7147 0.9052 0.039 Uiso 1 1 calc R . . 
C75 C 0.01189(15) 0.8307(5) 0.9367(3) 0.0413(18) Uani 1 1 d . . . 
H75A H -0.0060 0.8409 0.9174 0.050 Uiso 1 1 calc R . . 
C76 C 0.02478(17) 0.8899(5) 0.9720(3) 0.046(2) Uani 1 1 d . . . 
H76A H 0.0158 0.9404 0.9773 0.055 Uiso 1 1 calc R . . 
C77 C 0.05077(17) 0.8753(5) 0.9994(3) 0.0439(19) Uani 1 1 d . . . 
H77A H 0.0596 0.9154 1.0240 0.053 Uiso 1 1 calc R . . 
C78 C 0.06417(14) 0.8024(4) 0.9915(2) 0.0323(15) Uani 1 1 d . . . 
H78A H 0.0822 0.7939 1.0100 0.039 Uiso 1 1 calc R . . 
C79 C 0.04373(12) 0.5616(4) 0.9270(2) 0.0244(13) Uani 1 1 d . . . 
C80 C 0.04253(14) 0.5114(5) 0.8880(2) 0.0351(16) Uani 1 1 d . . . 
H80A H 0.0545 0.5224 0.8715 0.042 Uiso 1 1 calc R . . 
C81 C 0.02384(15) 0.4443(5) 0.8725(3) 0.0441(18) Uani 1 1 d . . . 
H81A H 0.0236 0.4084 0.8463 0.053 Uiso 1 1 calc R . . 
C82 C 0.00564(14) 0.4301(5) 0.8952(3) 0.0427(18) Uani 1 1 d . . . 
H82A H -0.0075 0.3858 0.8841 0.051 Uiso 1 1 calc R . . 
C83 C 0.00670(14) 0.4809(5) 0.9341(3) 0.0388(17) Uani 1 1 d . . . 
H83A H -0.0058 0.4718 0.9497 0.047 Uiso 1 1 calc R . . 
C84 C 0.02595(13) 0.5448(4) 0.9505(2) 0.0323(15) Uani 1 1 d . . . 
H84A H 0.0270 0.5776 0.9782 0.039 Uiso 1 1 calc R . . 
C85 C 0.17210(12) 0.1499(4) 1.0020(2) 0.0236(13) Uani 1 1 d . . . 
C86 C 0.16626(13) 0.0627(4) 1.0066(3) 0.0335(15) Uani 1 1 d . . . 
H86A H 0.1524 0.0479 1.0180 0.040 Uiso 1 1 calc R . . 
C87 C 0.18057(16) -0.0033(5) 0.9945(3) 0.0439(19) Uani 1 1 d . . . 
H87A H 0.1760 -0.0631 0.9968 0.053 Uiso 1 1 calc R . . 
C88 C 0.20140(15) 0.0169(5) 0.9790(3) 0.0381(16) Uani 1 1 d . . . 
H88A H 0.2112 -0.0286 0.9710 0.046 Uiso 1 1 calc R . . 
C89 C 0.20771(13) 0.1035(5) 0.9753(2) 0.0328(15) Uani 1 1 d . . . 
H89A H 0.2221 0.1182 0.9650 0.039 Uiso 1 1 calc R . . 
C90 C 0.19312(12) 0.1692(4) 0.9864(2) 0.0298(14) Uani 1 1 d . . . 
H90A H 0.1975 0.2288 0.9835 0.036 Uiso 1 1 calc R . . 
C91 C 0.12428(12) 0.1892(4) 1.0209(2) 0.0250(13) Uani 1 1 d . . . 
C92 C 0.12102(14) 0.1950(4) 1.0649(2) 0.0319(15) Uani 1 1 d . . . 
H92A H 0.1334 0.2269 1.0899 0.038 Uiso 1 1 calc R . . 
C93 C 0.09965(16) 0.1543(5) 1.0725(3) 0.0416(18) Uani 1 1 d . . . 
H93A H 0.0974 0.1592 1.1026 0.050 Uiso 1 1 calc R . . 
C94 C 0.08177(14) 0.1071(5) 1.0367(3) 0.0390(17) Uani 1 1 d . . . 
H94A H 0.0672 0.0792 1.0420 0.047 Uiso 1 1 calc R . . 
C95 C 0.08506(13) 0.1001(4) 0.9930(3) 0.0339(15) Uani 1 1 d . . . 
H95A H 0.0728 0.0671 0.9682 0.041 Uiso 1 1 calc R . . 
C96 C 0.10642(13) 0.1416(4) 0.9850(2) 0.0301(14) Uani 1 1 d . . . 
H96A H 0.1086 0.1369 0.9549 0.036 Uiso 1 1 calc R . . 
C97 C 0.13987(14) 0.7967(4) 1.0754(2) 0.0323(15) Uani 1 1 d . . . 
C98 C 0.12300(14) 0.7883(5) 1.1017(3) 0.0383(16) Uani 1 1 d . . . 
H98A H 0.1140 0.7343 1.1011 0.046 Uiso 1 1 calc R . . 
C99 C 0.11919(17) 0.8577(6) 1.1287(3) 0.051(2) Uani 1 1 d . . . 
H99A H 0.1072 0.8519 1.1456 0.061 Uiso 1 1 calc R . . 
C100 C 0.1330(2) 0.9355(6) 1.1311(3) 0.065(3) Uani 1 1 d . . . 
H10A H 0.1302 0.9835 1.1492 0.078 Uiso 1 1 calc R . . 
C101 C 0.1510(2) 0.9434(5) 1.1071(4) 0.066(3) Uani 1 1 d . . . 
H10B H 0.1610 0.9958 1.1100 0.079 Uiso 1 1 calc R . . 
C102 C 0.1543(2) 0.8750(5) 1.0788(3) 0.054(2) Uani 1 1 d . . . 
H10C H 0.1663 0.8811 1.0619 0.065 Uiso 1 1 calc R . . 
C103 C 0.15349(13) 0.7529(4) 0.9935(2) 0.0293(14) Uani 1 1 d . . . 
C104 C 0.13511(14) 0.8021(5) 0.9582(2) 0.0368(16) Uani 1 1 d . . . 
H10D H 0.1180 0.8116 0.9599 0.044 Uiso 1 1 calc R . . 
C105 C 0.14134(16) 0.8373(5) 0.9207(3) 0.0443(19) Uani 1 1 d . . . 
H10E H 0.1285 0.8709 0.8970 0.053 Uiso 1 1 calc R . . 
C106 C 0.16628(18) 0.8240(5) 0.9173(3) 0.0455(19) Uani 1 1 d . . . 
H10F H 0.1705 0.8471 0.8912 0.055 Uiso 1 1 calc R . . 
C107 C 0.18487(17) 0.7765(5) 0.9528(3) 0.0445(19) Uani 1 1 d . . . 
H10G H 0.2020 0.7676 0.9511 0.053 Uiso 1 1 calc R . . 
C108 C 0.17861(14) 0.7414(4) 0.9909(3) 0.0349(15) Uani 1 1 d . . . 
H10H H 0.1916 0.7095 1.0151 0.042 Uiso 1 1 calc R . . 
C1S C 0.0398(2) 0.9736(7) 0.7908(4) 0.067(3) Uani 1 1 d . . . 
H1SA H 0.0269 0.9753 0.7597 0.080 Uiso 1 1 calc R . . 
C2S C 0.03206(19) 0.9542(6) 0.8293(5) 0.075(3) Uani 1 1 d . . . 
H2SA H 0.0141 0.9412 0.8247 0.090 Uiso 1 1 calc R . . 
C3S C 0.0508(2) 0.9539(5) 0.8751(3) 0.055(2) Uani 1 1 d . . . 
H3SA H 0.0458 0.9415 0.9020 0.066 Uiso 1 1 calc R . . 
C4S C 0.07641(18) 0.9715(5) 0.8805(3) 0.052(2) Uani 1 1 d . . . 
H4SA H 0.0895 0.9711 0.9113 0.062 Uiso 1 1 calc R . . 
C5S C 0.08361(18) 0.9903(5) 0.8409(3) 0.053(2) Uani 1 1 d . . . 
H5SA H 0.1015 1.0034 0.8448 0.064 Uiso 1 1 calc R . . 
C6S C 0.0649(2) 0.9898(6) 0.7968(3) 0.059(2) Uani 1 1 d . . . 
H6SA H 0.0699 1.0013 0.7698 0.071 Uiso 1 1 calc R . . 
C7S C 0.1813(3) 0.6447(11) 0.2640(6) 0.047(4) Uiso 0.50 1 d PU . . 
C8S C 0.2083(3) 0.6455(11) 0.2691(6) 0.044(4) Uiso 0.50 1 d PU . . 
C9S C 0.21860(18) 0.7303(7) 0.2529(3) 0.0046(18) Uiso 0.50 1 d PU . . 
C10S C 0.2123(2) 0.7685(9) 0.2437(4) 0.023(3) Uiso 0.50 1 d PU . . 
C11S C 0.1765(3) 0.7935(11) 0.2350(6) 0.045(4) Uiso 0.50 1 d PU . . 
C12S C 0.1568(2) 0.7212(8) 0.2373(4) 0.026(3) Uiso 0.50 1 d PU . . 
C13S C 0.0514(3) 0.3294(10) 0.1728(6) 0.044(4) Uiso 0.50 1 d PU . . 
C14S C 0.0475(3) 0.2498(10) 0.1830(5) 0.044(3) Uiso 0.50 1 d PU . . 
C15S C 0.0288(3) 0.2249(11) 0.1966(6) 0.049(4) Uiso 0.50 1 d PU . . 
C16S C 0.0111(4) 0.2765(14) 0.2018(7) 0.067(5) Uiso 0.50 1 d P . . 
C17S C 0.0159(3) 0.3749(11) 0.1892(6) 0.051(4) Uiso 0.50 1 d P . . 
C18S C 0.0303(2) 0.3762(7) 0.1717(4) 0.020(2) Uiso 0.50 1 d P . . 
C19S C 0.2485(4) 0.9187(12) 0.1805(6) 0.054(4) Uiso 0.50 1 d PU . . 
C20S C 0.2341(5) 0.9668(16) 0.1479(9) 0.080(6) Uiso 0.50 1 d PU . . 
C21S C 0.2294(3) 0.9501(12) 0.1080(6) 0.051(4) Uiso 0.50 1 d PU . . 
C22S C 0.2377(3) 0.8879(9) 0.0898(5) 0.033(3) Uiso 0.50 1 d PU . . 
C23S C 0.2531(4) 0.8249(13) 0.1177(7) 0.058(4) Uiso 0.50 1 d PU . . 
C24S C 0.2591(3) 0.8476(9) 0.1771(5) 0.035(3) Uiso 0.50 1 d PU . . 
C25S C 0.0000 0.3618(9) 0.7500 0.061(4) Uani 1 2 d S . . 
H25A H 0.0000 0.4242 0.7500 0.073 Uiso 1 2 calc SR . . 
C26S C 0.01893(19) 0.3158(7) 0.7369(3) 0.060(3) Uani 1 1 d . . . 
H26B H 0.0319 0.3465 0.7280 0.072 Uiso 1 1 calc R . . 
C27S C 0.01849(18) 0.2262(7) 0.7370(3) 0.057(2) Uani 1 1 d . . . 
H27B H 0.0312 0.1944 0.7278 0.069 Uiso 1 1 calc R . . 
C28S C 0.0000 0.1818(9) 0.7500 0.055(3) Uani 1 2 d S . . 
H28A H 0.0000 0.1194 0.7500 0.067 Uiso 1 2 calc SR . . 
  
loop_ 
 _atom_site_aniso_label 
 _atom_site_aniso_U_11 
 _atom_site_aniso_U_22 
 _atom_site_aniso_U_33 
 _atom_site_aniso_U_23 
 _atom_site_aniso_U_13 
 _atom_site_aniso_U_12 
Au1 0.02053(19) 0.0205(8) 0.0213(3) -0.0015(5) 0.00901(19) -0.0018(4) 
Au2 0.0213(6) 0.0193(6) 0.0200(7) -0.0005(4) 0.0078(5) 0.0001(4) 
Pd1 0.0213(6) 0.0193(6) 0.0200(7) -0.0005(4) 0.0078(5) 0.0001(4) 
Pd2 0.02053(19) 0.0205(8) 0.0213(3) -0.0015(5) 0.00901(19) -0.0018(4) 
Tl1 0.04024(17) 0.04758(19) 0.04039(17) 0.00544(13) 0.01685(13) -0.00439(13) 
P1 0.0240(8) 0.0282(8) 0.0210(7) -0.0040(6) 0.0105(6) -0.0043(7) 
P2 0.0271(8) 0.0241(8) 0.0216(8) 0.0014(6) 0.0119(6) 0.0043(6) 
P3 0.0188(7) 0.0224(8) 0.0240(8) -0.0016(6) 0.0092(6) -0.0003(6) 
P4 0.0210(8) 0.0214(8) 0.0228(8) 0.0020(6) 0.0092(6) 0.0026(6) 
P5 0.0230(8) 0.0202(7) 0.0243(8) -0.0003(6) 0.0109(6) -0.0007(6) 
P6 0.0282(8) 0.0201(8) 0.0297(8) -0.0014(6) 0.0119(7) -0.0001(7) 
P7 0.0561(13) 0.0381(11) 0.0545(13) 0.0004(9) 0.0266(11) 0.0078(10) 
P8 0.0455(15) 0.0551(16) 0.156(3) -0.0277(18) 0.0272(18) -0.0099(12) 
N1 0.023(3) 0.026(3) 0.022(3) 0.001(2) 0.010(2) -0.001(2) 
N2 0.025(3) 0.022(3) 0.025(3) 0.003(2) 0.010(2) 0.003(2) 
N3 0.024(3) 0.020(2) 0.022(2) -0.002(2) 0.010(2) -0.003(2) 
N4 0.022(3) 0.021(3) 0.021(2) -0.001(2) 0.008(2) -0.001(2) 
N5 0.019(2) 0.026(3) 0.022(2) -0.002(2) 0.009(2) 0.001(2) 
N6 0.022(3) 0.028(3) 0.022(3) -0.001(2) 0.011(2) 0.001(2) 
F1 0.094(4) 0.081(4) 0.091(4) 0.031(3) 0.055(4) 0.015(3) 
F2 0.335(17) 0.153(9) 0.190(10) 0.045(8) 0.189(12) 0.146(11) 
F3 0.334(15) 0.050(4) 0.203(10) 0.053(5) 0.173(11) 0.029(6) 
F4 0.237(12) 0.124(7) 0.327(15) 0.080(9) 0.254(13) 0.071(8) 
F5 0.204(13) 0.237(15) 0.195(12) 0.033(11) -0.058(10) -0.148(12) 
F6 0.176(10) 0.246(13) 0.085(6) 0.051(7) -0.044(6) -0.062(9) 
F7 0.283(14) 0.166(10) 0.112(7) -0.068(7) 0.109(8) -0.098(9) 
F8 0.079(5) 0.157(8) 0.143(7) -0.052(6) 0.051(5) -0.031(5) 
F9 0.138(8) 0.149(9) 0.140(8) -0.024(7) -0.016(6) 0.026(7) 
F10 0.064(5) 0.205(11) 0.398(19) -0.157(13) 0.072(8) 0.002(6) 
F11 0.137(8) 0.067(5) 0.328(17) 0.019(7) 0.011(9) -0.018(5) 
F12 0.109(6) 0.086(5) 0.144(7) -0.032(5) 0.051(5) -0.052(4) 
C1 0.024(3) 0.028(3) 0.023(3) 0.003(3) 0.009(3) 0.002(3) 
C2 0.029(3) 0.032(4) 0.026(3) -0.004(3) 0.010(3) -0.005(3) 
C3 0.024(3) 0.034(4) 0.032(3) -0.002(3) 0.005(3) -0.006(3) 
C4 0.022(3) 0.031(3) 0.033(3) 0.000(3) 0.010(3) -0.003(3) 
C5 0.020(3) 0.025(3) 0.027(3) 0.001(3) 0.008(2) -0.001(2) 
C6 0.025(3) 0.024(3) 0.028(3) 0.003(3) 0.012(3) 0.002(3) 
C7 0.033(4) 0.030(3) 0.034(4) 0.002(3) 0.018(3) -0.002(3) 
C8 0.040(4) 0.036(4) 0.044(4) 0.002(3) 0.031(3) -0.003(3) 
C9 0.047(4) 0.032(4) 0.037(4) 0.002(3) 0.029(3) 0.000(3) 
C10 0.030(3) 0.026(3) 0.027(3) 0.008(3) 0.016(3) 0.011(3) 
C11 0.028(3) 0.033(4) 0.044(4) 0.000(3) 0.014(3) -0.009(3) 
C12 0.028(3) 0.036(4) 0.043(4) 0.004(3) 0.020(3) -0.007(3) 
C13 0.021(3) 0.025(3) 0.023(3) -0.005(2) 0.009(2) -0.001(2) 
C14 0.022(3) 0.033(3) 0.031(3) 0.002(3) 0.015(3) 0.000(3) 
C15 0.030(3) 0.036(4) 0.029(3) 0.001(3) 0.017(3) -0.005(3) 
C16 0.027(3) 0.024(3) 0.024(3) -0.002(2) 0.012(3) -0.005(3) 
C17 0.026(3) 0.021(3) 0.021(3) -0.003(2) 0.010(2) -0.001(2) 
C18 0.025(3) 0.021(3) 0.022(3) 0.001(2) 0.008(2) -0.001(2) 
C19 0.032(3) 0.029(3) 0.023(3) 0.003(3) 0.011(3) 0.000(3) 
C20 0.030(3) 0.031(3) 0.027(3) 0.010(3) 0.007(3) 0.005(3) 
C21 0.026(3) 0.032(4) 0.027(3) 0.007(3) 0.008(3) 0.007(3) 
C22 0.021(3) 0.021(3) 0.023(3) -0.001(2) 0.008(2) -0.002(2) 
C23 0.036(4) 0.032(4) 0.030(3) 0.004(3) 0.018(3) -0.003(3) 
C24 0.037(4) 0.032(4) 0.026(3) 0.010(3) 0.012(3) 0.002(3) 
C25 0.021(3) 0.026(3) 0.025(3) -0.002(2) 0.011(2) 0.001(2) 
C26 0.031(3) 0.025(3) 0.029(3) 0.006(3) 0.014(3) 0.006(3) 
C27 0.030(3) 0.034(4) 0.026(3) 0.005(3) 0.011(3) 0.011(3) 
C28 0.024(3) 0.037(4) 0.022(3) -0.001(3) 0.010(3) 0.006(3) 
C29 0.020(3) 0.028(3) 0.020(3) -0.001(2) 0.010(2) 0.003(2) 
C30 0.021(3) 0.031(3) 0.022(3) -0.005(3) 0.009(2) 0.000(3) 
C31 0.026(3) 0.033(4) 0.025(3) -0.007(3) 0.009(3) -0.001(3) 
C32 0.029(3) 0.039(4) 0.031(4) -0.012(3) 0.008(3) -0.007(3) 
C33 0.037(4) 0.029(4) 0.039(4) -0.007(3) 0.013(3) -0.003(3) 
C34 0.025(3) 0.025(3) 0.028(3) -0.005(3) 0.011(3) -0.001(3) 
C35 0.026(3) 0.042(4) 0.023(3) 0.001(3) 0.003(3) 0.005(3) 
C36 0.023(3) 0.051(4) 0.022(3) -0.008(3) 0.001(3) 0.003(3) 
C37 0.029(3) 0.031(3) 0.032(3) -0.007(3) 0.017(3) -0.007(3) 
C38 0.030(4) 0.035(4) 0.051(4) -0.009(3) 0.019(3) -0.005(3) 
C39 0.045(5) 0.035(4) 0.078(6) -0.020(4) 0.029(4) -0.008(4) 
C40 0.068(6) 0.043(5) 0.083(7) -0.033(5) 0.053(5) -0.015(5) 
C41 0.069(6) 0.052(5) 0.047(5) -0.024(4) 0.038(4) -0.021(5) 
C42 0.049(4) 0.043(4) 0.031(4) -0.012(3) 0.021(3) -0.017(3) 
C43 0.029(3) 0.029(3) 0.018(3) -0.005(2) 0.005(3) -0.005(3) 
C44 0.033(4) 0.046(4) 0.025(3) -0.004(3) 0.011(3) -0.012(3) 
C45 0.046(4) 0.042(4) 0.028(4) -0.007(3) 0.014(3) -0.020(4) 
C46 0.068(5) 0.032(4) 0.022(3) -0.001(3) 0.009(3) -0.013(4) 
C47 0.047(4) 0.035(4) 0.032(4) -0.001(3) 0.009(3) 0.003(3) 
C48 0.036(4) 0.037(4) 0.022(3) -0.003(3) 0.010(3) -0.002(3) 
C49 0.027(3) 0.021(3) 0.027(3) -0.002(2) 0.014(3) 0.001(3) 
C50 0.036(4) 0.038(4) 0.026(3) 0.007(3) 0.016(3) 0.007(3) 
C51 0.033(4) 0.031(4) 0.043(4) 0.007(3) 0.022(3) 0.007(3) 
C52 0.042(4) 0.031(4) 0.038(4) -0.004(3) 0.025(3) 0.003(3) 
C53 0.044(4) 0.039(4) 0.024(3) 0.001(3) 0.017(3) 0.009(3) 
C54 0.038(4) 0.029(3) 0.027(3) 0.001(3) 0.016(3) 0.010(3) 
C55 0.036(4) 0.037(4) 0.022(3) 0.004(3) 0.016(3) 0.015(3) 
C56 0.072(6) 0.034(4) 0.027(4) 0.003(3) 0.015(4) 0.018(4) 
C57 0.092(7) 0.046(5) 0.034(4) 0.008(4) 0.020(5) 0.029(5) 
C58 0.064(6) 0.081(7) 0.032(4) 0.022(4) 0.025(4) 0.046(5) 
C59 0.030(4) 0.085(7) 0.030(4) 0.007(4) 0.014(3) 0.010(4) 
C60 0.034(4) 0.056(5) 0.029(4) 0.009(3) 0.018(3) 0.008(3) 
C61 0.023(3) 0.025(3) 0.025(3) -0.001(2) 0.010(3) 0.003(3) 
C62 0.025(3) 0.041(4) 0.041(4) -0.014(3) 0.012(3) -0.001(3) 
C63 0.027(4) 0.054(5) 0.042(4) -0.008(4) 0.016(3) 0.006(3) 
C64 0.040(4) 0.043(4) 0.038(4) -0.001(3) 0.022(3) 0.011(3) 
C65 0.041(4) 0.040(4) 0.039(4) -0.018(3) 0.020(3) -0.002(3) 
C66 0.032(4) 0.034(4) 0.038(4) -0.006(3) 0.019(3) -0.004(3) 
C67 0.021(3) 0.028(3) 0.029(3) -0.006(3) 0.012(3) 0.000(3) 
C68 0.028(3) 0.029(4) 0.040(4) -0.002(3) 0.008(3) 0.002(3) 
C69 0.030(4) 0.032(4) 0.051(4) -0.013(3) 0.009(3) -0.003(3) 
C70 0.021(3) 0.050(4) 0.036(4) -0.017(3) 0.010(3) -0.002(3) 
C71 0.024(3) 0.051(4) 0.028(3) -0.002(3) 0.013(3) 0.004(3) 
C72 0.027(3) 0.037(4) 0.029(3) -0.004(3) 0.015(3) -0.001(3) 
C73 0.030(3) 0.023(3) 0.029(3) 0.004(3) 0.019(3) 0.006(3) 
C74 0.031(4) 0.031(4) 0.039(4) 0.009(3) 0.018(3) 0.004(3) 
C75 0.037(4) 0.036(4) 0.061(5) 0.020(4) 0.030(4) 0.015(3) 
C76 0.063(5) 0.030(4) 0.063(5) 0.016(4) 0.046(5) 0.019(4) 
C77 0.069(6) 0.030(4) 0.041(4) 0.003(3) 0.030(4) 0.006(4) 
C78 0.040(4) 0.029(4) 0.030(3) 0.006(3) 0.016(3) 0.009(3) 
C79 0.021(3) 0.025(3) 0.027(3) 0.004(3) 0.008(2) 0.004(2) 
C80 0.032(4) 0.042(4) 0.033(4) -0.005(3) 0.014(3) -0.007(3) 
C81 0.044(4) 0.047(5) 0.040(4) -0.009(3) 0.013(3) -0.013(4) 
C82 0.031(4) 0.044(4) 0.046(4) 0.004(4) 0.003(3) -0.011(3) 
C83 0.026(4) 0.040(4) 0.054(5) 0.008(3) 0.018(3) 0.000(3) 
C84 0.032(4) 0.031(4) 0.038(4) 0.004(3) 0.017(3) 0.003(3) 
C85 0.028(3) 0.021(3) 0.023(3) -0.003(2) 0.011(3) 0.001(2) 
C86 0.033(4) 0.027(3) 0.049(4) 0.000(3) 0.025(3) 0.001(3) 
C87 0.049(5) 0.025(4) 0.069(5) -0.004(3) 0.034(4) -0.003(3) 
C88 0.039(4) 0.030(4) 0.049(4) -0.008(3) 0.021(3) 0.007(3) 
C89 0.026(3) 0.036(4) 0.042(4) 0.000(3) 0.019(3) 0.002(3) 
C90 0.026(3) 0.028(3) 0.038(4) 0.003(3) 0.014(3) 0.002(3) 
C91 0.024(3) 0.018(3) 0.037(3) 0.004(3) 0.016(3) 0.003(2) 
C92 0.036(4) 0.029(3) 0.038(4) -0.006(3) 0.022(3) -0.005(3) 
C93 0.054(5) 0.037(4) 0.051(4) -0.008(3) 0.039(4) -0.006(4) 
C94 0.036(4) 0.030(4) 0.061(5) 0.001(3) 0.029(4) -0.006(3) 
C95 0.029(4) 0.029(4) 0.043(4) 0.002(3) 0.010(3) -0.003(3) 
C96 0.028(3) 0.030(3) 0.033(3) 0.006(3) 0.011(3) -0.001(3) 
C97 0.041(4) 0.021(3) 0.035(4) -0.002(3) 0.013(3) 0.007(3) 
C98 0.031(4) 0.043(4) 0.039(4) -0.009(3) 0.010(3) 0.001(3) 
C99 0.050(5) 0.055(5) 0.050(5) -0.018(4) 0.021(4) 0.009(4) 
C100 0.095(7) 0.042(5) 0.062(6) -0.021(4) 0.033(5) 0.016(5) 
C101 0.104(8) 0.024(4) 0.075(6) -0.015(4) 0.036(6) -0.007(5) 
C102 0.084(7) 0.029(4) 0.061(5) -0.006(4) 0.040(5) -0.006(4) 
C103 0.036(4) 0.021(3) 0.032(3) -0.007(3) 0.014(3) -0.008(3) 
C104 0.035(4) 0.033(4) 0.039(4) 0.002(3) 0.008(3) -0.009(3) 
C105 0.053(5) 0.036(4) 0.038(4) 0.006(3) 0.008(4) -0.014(4) 
C106 0.075(6) 0.030(4) 0.038(4) 0.001(3) 0.027(4) -0.012(4) 
C107 0.058(5) 0.026(4) 0.062(5) -0.002(3) 0.038(4) -0.002(3) 
C108 0.043(4) 0.025(3) 0.042(4) -0.001(3) 0.022(3) 0.000(3) 
C1S 0.068(7) 0.063(6) 0.055(6) -0.009(5) 0.003(5) 0.016(5) 
C2S 0.040(5) 0.051(6) 0.135(11) -0.031(6) 0.034(6) -0.005(4) 
C3S 0.083(7) 0.036(4) 0.066(6) 0.001(4) 0.051(5) -0.006(4) 
C4S 0.060(5) 0.041(5) 0.051(5) -0.004(4) 0.014(4) 0.004(4) 
C5S 0.054(5) 0.040(5) 0.074(6) -0.003(4) 0.033(5) -0.008(4) 
C6S 0.090(8) 0.044(5) 0.056(6) 0.011(4) 0.040(5) 0.008(5) 
C25S 0.093(10) 0.053(8) 0.037(6) 0.000 0.021(7) 0.000 
C26S 0.070(6) 0.081(7) 0.042(5) -0.011(4) 0.036(4) -0.024(5) 
C27S 0.053(5) 0.080(7) 0.041(5) -0.007(4) 0.018(4) 0.015(5) 
C28S 0.067(8) 0.055(7) 0.043(6) 0.000 0.017(6) 0.000 
  
_geom_special_details 
; 
 All esds (except the esd in the dihedral angle between two l.s. planes) 
 are estimated using the full covariance matrix.  The cell esds are taken 
 into account individually in the estimation of esds in distances, angles 
 and torsion angles; correlations between esds in cell parameters are only 
 used when they are defined by crystal symmetry.  An approximate (isotropic) 
 treatment of cell esds is used for estimating esds involving l.s. planes. 
; 
  
loop_ 
 _geom_bond_atom_site_label_1 
 _geom_bond_atom_site_label_2 
 _geom_bond_distance 
 _geom_bond_site_symmetry_2 
 _geom_bond_publ_flag 
Au1 P1 2.323(10) . ? 
Au1 P5 2.337(11) . ? 
Au1 P3 2.359(10) . ? 
Au1 Tl1 2.813(8) . ? 
Au2 P6 2.306(5) . ? 
Au2 P2 2.350(6) . ? 
Au2 P4 2.377(6) . ? 
Au2 Tl1 2.861(5) . ? 
Pd1 P4 2.298(15) . ? 
Pd1 P2 2.336(17) . ? 
Pd1 P6 2.410(15) . ? 
Pd1 Tl1 2.793(14) . ? 
Pd2 P3 2.321(15) . ? 
Pd2 P5 2.363(16) . ? 
Pd2 P1 2.355(14) . ? 
Pd2 Tl1 2.748(13) . ? 
P1 C43 1.822(6) . ? 
P1 C37 1.838(6) . ? 
P1 C1 1.841(6) . ? 
P2 C55 1.824(7) . ? 
P2 C10 1.829(7) . ? 
P2 C49 1.838(6) . ? 
P3 C13 1.830(6) . ? 
P3 C61 1.837(6) . ? 
P3 C67 1.837(6) . ? 
P4 C79 1.823(6) . ? 
P4 C73 1.834(6) . ? 
P4 C22 1.844(6) . ? 
P5 C91 1.831(6) . ? 
P5 C85 1.833(6) . ? 
P5 C25 1.836(6) . ? 
P6 C103 1.818(7) . ? 
P6 C97 1.828(7) . ? 
P6 C34 1.844(7) . ? 
P7 F5 1.489(10) . ? 
P7 F6 1.499(9) . ? 
P7 F2 1.510(8) . ? 
P7 F4 1.516(7) . ? 
P7 F3 1.552(7) . ? 
P7 F1 1.580(6) . ? 
P8 F10 1.515(8) . ? 
P8 F7 1.528(11) . ? 
P8 F8 1.539(8) . ? 
P8 F11 1.539(9) . ? 
P8 F12 1.554(7) . ? 
P8 F9 1.653(10) . ? 
N1 C1 1.328(8) . ? 
N1 C5 1.358(8) . ? 
N2 C10 1.338(8) . ? 
N2 C6 1.351(8) . ? 
N3 C13 1.333(8) . ? 
N3 C17 1.351(8) . ? 
N4 C22 1.330(8) . ? 
N4 C18 1.353(7) . ? 
N5 C25 1.331(8) . ? 
N5 C29 1.350(8) . ? 
N6 C34 1.333(8) . ? 
N6 C30 1.358(8) . ? 
C1 C2 1.413(9) . ? 
C2 C3 1.362(9) . ? 
C3 C4 1.399(9) . ? 
C4 C5 1.415(9) . ? 
C4 C11 1.442(9) . ? 
C5 C6 1.458(9) . ? 
C6 C7 1.425(9) . ? 
C7 C8 1.398(9) . ? 
C7 C12 1.434(9) . ? 
C8 C9 1.360(10) . ? 
C9 C10 1.407(9) . ? 
C11 C12 1.332(10) . ? 
C13 C14 1.417(8) . ? 
C14 C15 1.363(9) . ? 
C15 C16 1.400(9) . ? 
C16 C17 1.412(8) . ? 
C16 C23 1.440(9) . ? 
C17 C18 1.456(8) . ? 
C18 C19 1.418(9) . ? 
C19 C20 1.389(9) . ? 
C19 C24 1.444(9) . ? 
C20 C21 1.372(9) . ? 
C21 C22 1.398(8) . ? 
C23 C24 1.335(9) . ? 
C25 C26 1.404(9) . ? 
C26 C27 1.360(9) . ? 
C27 C28 1.405(9) . ? 
C28 C29 1.407(8) . ? 
C28 C35 1.421(9) . ? 
C29 C30 1.447(9) . ? 
C30 C31 1.420(9) . ? 
C31 C32 1.390(10) . ? 
C31 C36 1.429(9) . ? 
C32 C33 1.370(10) . ? 
C33 C34 1.412(9) . ? 
C35 C36 1.352(10) . ? 
C37 C38 1.383(10) . ? 
C37 C42 1.394(9) . ? 
C38 C39 1.378(10) . ? 
C39 C40 1.371(13) . ? 
C40 C41 1.384(13) . ? 
C41 C42 1.390(11) . ? 
C43 C48 1.386(9) . ? 
C43 C44 1.405(9) . ? 
C44 C45 1.382(10) . ? 
C45 C46 1.358(11) . ? 
C46 C47 1.390(11) . ? 
C47 C48 1.398(10) . ? 
C49 C54 1.387(8) . ? 
C49 C50 1.404(9) . ? 
C50 C51 1.374(9) . ? 
C51 C52 1.408(10) . ? 
C52 C53 1.363(10) . ? 
C53 C54 1.387(9) . ? 
C55 C56 1.384(10) . ? 
C55 C60 1.394(10) . ? 
C56 C57 1.382(11) . ? 
C57 C58 1.371(14) . ? 
C58 C59 1.384(13) . ? 
C59 C60 1.383(10) . ? 
C61 C66 1.381(9) . ? 
C61 C62 1.382(9) . ? 
C62 C63 1.404(9) . ? 
C63 C64 1.360(10) . ? 
C64 C65 1.380(10) . ? 
C65 C66 1.379(9) . ? 
C67 C68 1.386(9) . ? 
C67 C72 1.392(9) . ? 
C68 C69 1.386(10) . ? 
C69 C70 1.377(11) . ? 
C70 C71 1.379(10) . ? 
C71 C72 1.388(9) . ? 
C73 C78 1.388(9) . ? 
C73 C74 1.387(9) . ? 
C74 C75 1.400(10) . ? 
C75 C76 1.381(12) . ? 
C76 C77 1.377(12) . ? 
C77 C78 1.385(10) . ? 
C79 C80 1.378(9) . ? 
C79 C84 1.390(9) . ? 
C80 C81 1.396(10) . ? 
C81 C82 1.386(11) . ? 
C82 C83 1.382(11) . ? 
C83 C84 1.384(10) . ? 
C85 C86 1.381(9) . ? 
C85 C90 1.392(9) . ? 
C86 C87 1.387(10) . ? 
C87 C88 1.385(10) . ? 
C88 C89 1.375(10) . ? 
C89 C90 1.380(9) . ? 
C91 C96 1.378(9) . ? 
C91 C92 1.385(9) . ? 
C92 C93 1.391(9) . ? 
C93 C94 1.374(11) . ? 
C94 C95 1.380(10) . ? 
C95 C96 1.400(9) . ? 
C97 C98 1.394(10) . ? 
C97 C102 1.408(11) . ? 
C98 C99 1.387(10) . ? 
C99 C100 1.388(13) . ? 
C100 C101 1.392(14) . ? 
C101 C102 1.391(11) . ? 
C103 C108 1.391(9) . ? 
C103 C104 1.394(10) . ? 
C104 C105 1.383(10) . ? 
C105 C106 1.394(12) . ? 
C106 C107 1.387(12) . ? 
C107 C108 1.400(10) . ? 
C1S C6S 1.323(14) . ? 
C1S C2S 1.382(15) . ? 
C2S C3S 1.398(15) . ? 
C3S C4S 1.357(13) . ? 
C4S C5S 1.393(12) . ? 
C5S C6S 1.361(13) . ? 
C7S C8S 1.40(2) . ? 
C7S C12S 1.74(2) . ? 
C8S C9S 1.547(18) . ? 
C9S C10S 0.682(13) . ? 
C10S C11S 1.89(2) . ? 
C11S C12S 1.55(2) . ? 
C13S C18S 1.334(19) . ? 
C13S C14S 1.28(2) . ? 
C14S C15S 1.27(2) . ? 
C15S C16S 1.28(3) . ? 
C16S C17S 1.59(3) . ? 
C17S C18S 1.073(19) . ? 
C19S C24S 1.24(2) . ? 
C19S C20S 1.25(3) . ? 
C20S C21S 1.16(3) . ? 
C21S C22S 1.25(2) . ? 
C22S C23S 1.35(2) . ? 
C23S C24S 1.73(2) . ? 
C25S C26S 1.398(12) . ? 
C25S C26S 1.398(12) 2_556 ? 
C26S C27S 1.363(14) . ? 
C27S C28S 1.365(12) . ? 
C28S C27S 1.364(12) 2_556 ? 
  
loop_ 
 _geom_angle_atom_site_label_1 
 _geom_angle_atom_site_label_2 
 _geom_angle_atom_site_label_3 
 _geom_angle 
 _geom_angle_site_symmetry_1 
 _geom_angle_site_symmetry_3 
 _geom_angle_publ_flag 
P1 Au1 P5 116.4(4) . . ? 
P1 Au1 P3 118.0(4) . . ? 
P5 Au1 P3 123.6(4) . . ? 
P1 Au1 Tl1 98.1(3) . . ? 
P5 Au1 Tl1 94.0(3) . . ? 
P3 Au1 Tl1 92.0(3) . . ? 
P6 Au2 P2 124.3(2) . . ? 
P6 Au2 P4 120.4(3) . . ? 
P2 Au2 P4 113.3(2) . . ? 
P6 Au2 Tl1 97.7(2) . . ? 
P2 Au2 Tl1 91.80(18) . . ? 
P4 Au2 Tl1 94.33(16) . . ? 
P4 Pd1 P2 116.9(6) . . ? 
P4 Pd1 P6 119.3(7) . . ? 
P2 Pd1 P6 120.3(6) . . ? 
P4 Pd1 Tl1 97.9(5) . . ? 
P2 Pd1 Tl1 93.8(5) . . ? 
P6 Pd1 Tl1 97.1(5) . . ? 
P3 Pd2 P5 124.1(6) . . ? 
P3 Pd2 P1 118.3(7) . . ? 
P5 Pd2 P1 114.1(6) . . ? 
P3 Pd2 Tl1 94.5(5) . . ? 
P5 Pd2 Tl1 95.1(5) . . ? 
P1 Pd2 Tl1 99.1(5) . . ? 
Pd2 Tl1 Pd1 176.5(4) . . ? 
Pd2 Tl1 Au1 0.9(5) . . ? 
Pd1 Tl1 Au1 176.8(4) . . ? 
Pd2 Tl1 Au2 174.5(3) . . ? 
Pd1 Tl1 Au2 2.1(4) . . ? 
Au1 Tl1 Au2 175.0(2) . . ? 
C43 P1 C37 102.5(3) . . ? 
C43 P1 C1 104.3(3) . . ? 
C37 P1 C1 105.2(3) . . ? 
C43 P1 Au1 119.8(3) . . ? 
C37 P1 Au1 113.0(3) . . ? 
C1 P1 Au1 110.7(3) . . ? 
C43 P1 Pd2 118.4(4) . . ? 
C37 P1 Pd2 114.5(4) . . ? 
C1 P1 Pd2 110.6(4) . . ? 
Au1 P1 Pd2 1.7(6) . . ? 
C55 P2 C10 102.7(3) . . ? 
C55 P2 C49 101.9(3) . . ? 
C10 P2 C49 105.4(3) . . ? 
C55 P2 Pd1 125.8(4) . . ? 
C10 P2 Pd1 111.2(4) . . ? 
C49 P2 Pd1 107.9(4) . . ? 
C55 P2 Au2 124.1(3) . . ? 
C10 P2 Au2 114.3(2) . . ? 
C49 P2 Au2 106.4(2) . . ? 
Pd1 P2 Au2 3.0(4) . . ? 
C13 P3 C61 104.4(3) . . ? 
C13 P3 C67 102.5(3) . . ? 
C61 P3 C67 101.2(3) . . ? 
C13 P3 Pd2 110.9(4) . . ? 
C61 P3 Pd2 110.3(4) . . ? 
C67 P3 Pd2 125.3(4) . . ? 
C13 P3 Au1 111.6(3) . . ? 
C61 P3 Au1 108.7(3) . . ? 
C67 P3 Au1 126.1(3) . . ? 
Pd2 P3 Au1 1.6(5) . . ? 
C79 P4 C73 103.3(3) . . ? 
C79 P4 C22 103.8(3) . . ? 
C73 P4 C22 104.6(3) . . ? 
C79 P4 Pd1 118.0(4) . . ? 
C73 P4 Pd1 113.8(4) . . ? 
C22 P4 Pd1 111.9(5) . . ? 
C79 P4 Au2 120.2(2) . . ? 
C73 P4 Au2 111.7(2) . . ? 
C22 P4 Au2 111.7(2) . . ? 
Pd1 P4 Au2 2.4(5) . . ? 
C91 P5 C85 103.6(3) . . ? 
C91 P5 C25 104.2(3) . . ? 
C85 P5 C25 103.2(3) . . ? 
C91 P5 Au1 126.2(3) . . ? 
C85 P5 Au1 103.9(3) . . ? 
C25 P5 Au1 113.1(3) . . ? 
C91 P5 Pd2 126.5(4) . . ? 
C85 P5 Pd2 105.3(4) . . ? 
C25 P5 Pd2 111.5(4) . . ? 
Au1 P5 Pd2 1.8(5) . . ? 
C103 P6 C97 103.5(3) . . ? 
C103 P6 C34 105.1(3) . . ? 
C97 P6 C34 103.6(3) . . ? 
C103 P6 Au2 120.3(3) . . ? 
C97 P6 Au2 110.5(3) . . ? 
C34 P6 Au2 112.2(3) . . ? 
C103 P6 Pd1 118.9(4) . . ? 
C97 P6 Pd1 112.0(4) . . ? 
C34 P6 Pd1 112.3(4) . . ? 
Au2 P6 Pd1 1.7(5) . . ? 
F5 P7 F6 176.3(9) . . ? 
F5 P7 F2 85.7(10) . . ? 
F6 P7 F2 91.3(9) . . ? 
F5 P7 F4 92.5(10) . . ? 
F6 P7 F4 90.3(8) . . ? 
F2 P7 F4 177.1(7) . . ? 
F5 P7 F3 92.7(7) . . ? 
F6 P7 F3 89.7(7) . . ? 
F2 P7 F3 93.6(6) . . ? 
F4 P7 F3 88.8(5) . . ? 
F5 P7 F1 87.3(6) . . ? 
F6 P7 F1 90.4(5) . . ? 
F2 P7 F1 88.1(5) . . ? 
F4 P7 F1 89.5(4) . . ? 
F3 P7 F1 178.3(5) . . ? 
F10 P8 F7 102.1(8) . . ? 
F10 P8 F8 171.5(8) . . ? 
F7 P8 F8 86.2(6) . . ? 
F10 P8 F11 89.8(7) . . ? 
F7 P8 F11 89.8(7) . . ? 
F8 P8 F11 88.5(6) . . ? 
F10 P8 F12 91.1(6) . . ? 
F7 P8 F12 92.2(5) . . ? 
F8 P8 F12 90.3(5) . . ? 
F11 P8 F12 177.6(8) . . ? 
F10 P8 F9 85.2(7) . . ? 
F7 P8 F9 172.3(6) . . ? 
F8 P8 F9 86.5(5) . . ? 
F11 P8 F9 92.6(7) . . ? 
F12 P8 F9 85.3(5) . . ? 
C1 N1 C5 117.5(5) . . ? 
C10 N2 C6 118.4(5) . . ? 
C13 N3 C17 118.6(5) . . ? 
C22 N4 C18 117.7(5) . . ? 
C25 N5 C29 117.9(5) . . ? 
C34 N6 C30 118.1(5) . . ? 
N1 C1 C2 123.9(6) . . ? 
N1 C1 P1 114.6(4) . . ? 
C2 C1 P1 121.3(5) . . ? 
C3 C2 C1 118.3(6) . . ? 
C2 C3 C4 119.7(6) . . ? 
C3 C4 C5 118.2(6) . . ? 
C3 C4 C11 121.4(6) . . ? 
C5 C4 C11 120.4(6) . . ? 
N1 C5 C4 122.3(6) . . ? 
N1 C5 C6 118.9(5) . . ? 
C4 C5 C6 118.8(5) . . ? 
N2 C6 C7 122.0(6) . . ? 
N2 C6 C5 120.0(5) . . ? 
C7 C6 C5 118.1(6) . . ? 
C8 C7 C6 118.0(6) . . ? 
C8 C7 C12 121.2(6) . . ? 
C6 C7 C12 120.8(6) . . ? 
C9 C8 C7 119.5(6) . . ? 
C8 C9 C10 119.6(6) . . ? 
N2 C10 C9 122.5(6) . . ? 
N2 C10 P2 116.0(4) . . ? 
C9 C10 P2 121.5(5) . . ? 
C12 C11 C4 121.0(6) . . ? 
C11 C12 C7 120.9(6) . . ? 
N3 C13 C14 122.4(6) . . ? 
N3 C13 P3 115.3(4) . . ? 
C14 C13 P3 122.3(5) . . ? 
C15 C14 C13 118.9(6) . . ? 
C14 C15 C16 120.0(6) . . ? 
C15 C16 C17 117.7(6) . . ? 
C15 C16 C23 121.6(5) . . ? 
C17 C16 C23 120.6(6) . . ? 
N3 C17 C16 122.4(5) . . ? 
N3 C17 C18 119.1(5) . . ? 
C16 C17 C18 118.5(5) . . ? 
N4 C18 C19 121.8(5) . . ? 
N4 C18 C17 119.4(5) . . ? 
C19 C18 C17 118.8(5) . . ? 
C20 C19 C18 118.4(6) . . ? 
C20 C19 C24 121.3(6) . . ? 
C18 C19 C24 120.3(6) . . ? 
C21 C20 C19 119.9(6) . . ? 
C20 C21 C22 117.8(6) . . ? 
N4 C22 C21 124.3(5) . . ? 
N4 C22 P4 114.7(4) . . ? 
C21 C22 P4 120.8(5) . . ? 
C24 C23 C16 121.0(6) . . ? 
C23 C24 C19 120.7(6) . . ? 
N5 C25 C26 123.3(6) . . ? 
N5 C25 P5 114.6(4) . . ? 
C26 C25 P5 121.9(5) . . ? 
C27 C26 C25 118.5(6) . . ? 
C26 C27 C28 119.8(6) . . ? 
C27 C28 C29 117.6(6) . . ? 
C27 C28 C35 121.6(6) . . ? 
C29 C28 C35 120.8(6) . . ? 
N5 C29 C28 122.4(6) . . ? 
N5 C29 C30 119.0(5) . . ? 
C28 C29 C30 118.5(6) . . ? 
N6 C30 C31 121.6(6) . . ? 
N6 C30 C29 119.3(5) . . ? 
C31 C30 C29 119.0(6) . . ? 
C32 C31 C30 118.6(6) . . ? 
C32 C31 C36 121.5(6) . . ? 
C30 C31 C36 119.9(6) . . ? 
C33 C32 C31 119.7(6) . . ? 
C32 C33 C34 118.4(6) . . ? 
N6 C34 C33 123.3(6) . . ? 
N6 C34 P6 114.4(4) . . ? 
C33 C34 P6 122.0(5) . . ? 
C36 C35 C28 120.9(6) . . ? 
C35 C36 C31 120.6(6) . . ? 
C38 C37 C42 118.6(6) . . ? 
C38 C37 P1 119.0(5) . . ? 
C42 C37 P1 122.3(6) . . ? 
C39 C38 C37 120.9(7) . . ? 
C40 C39 C38 120.6(8) . . ? 
C39 C40 C41 119.6(7) . . ? 
C40 C41 C42 120.1(8) . . ? 
C41 C42 C37 120.2(8) . . ? 
C48 C43 C44 119.0(6) . . ? 
C48 C43 P1 123.1(5) . . ? 
C44 C43 P1 117.8(5) . . ? 
C45 C44 C43 120.1(7) . . ? 
C46 C45 C44 120.5(7) . . ? 
C45 C46 C47 120.7(7) . . ? 
C46 C47 C48 119.4(7) . . ? 
C43 C48 C47 120.2(6) . . ? 
C54 C49 C50 118.8(6) . . ? 
C54 C49 P2 123.0(5) . . ? 
C50 C49 P2 117.9(4) . . ? 
C51 C50 C49 120.8(6) . . ? 
C50 C51 C52 119.6(6) . . ? 
C53 C52 C51 119.4(6) . . ? 
C52 C53 C54 121.3(6) . . ? 
C49 C54 C53 120.0(6) . . ? 
C56 C55 C60 119.1(7) . . ? 
C56 C55 P2 123.3(6) . . ? 
C60 C55 P2 117.6(5) . . ? 
C55 C56 C57 121.1(8) . . ? 
C58 C57 C56 119.6(8) . . ? 
C57 C58 C59 120.1(7) . . ? 
C58 C59 C60 120.6(8) . . ? 
C59 C60 C55 119.5(8) . . ? 
C66 C61 C62 118.6(6) . . ? 
C66 C61 P3 118.2(5) . . ? 
C62 C61 P3 123.1(5) . . ? 
C61 C62 C63 120.0(6) . . ? 
C64 C63 C62 120.3(7) . . ? 
C63 C64 C65 120.2(6) . . ? 
C64 C65 C66 119.6(7) . . ? 
C61 C66 C65 121.4(6) . . ? 
C68 C67 C72 118.5(6) . . ? 
C68 C67 P3 122.6(5) . . ? 
C72 C67 P3 118.8(5) . . ? 
C67 C68 C69 120.9(7) . . ? 
C70 C69 C68 120.4(7) . . ? 
C71 C70 C69 119.1(6) . . ? 
C70 C71 C72 121.0(7) . . ? 
C71 C72 C67 120.1(6) . . ? 
C78 C73 C74 119.5(6) . . ? 
C78 C73 P4 118.1(5) . . ? 
C74 C73 P4 122.4(5) . . ? 
C73 C74 C75 119.7(7) . . ? 
C76 C75 C74 120.4(7) . . ? 
C77 C76 C75 119.5(7) . . ? 
C76 C77 C78 120.6(8) . . ? 
C77 C78 C73 120.2(7) . . ? 
C80 C79 C84 118.9(6) . . ? 
C80 C79 P4 120.7(5) . . ? 
C84 C79 P4 120.2(5) . . ? 
C79 C80 C81 120.5(7) . . ? 
C82 C81 C80 120.0(7) . . ? 
C81 C82 C83 119.5(7) . . ? 
C82 C83 C84 120.1(7) . . ? 
C83 C84 C79 120.8(7) . . ? 
C86 C85 C90 118.3(6) . . ? 
C86 C85 P5 124.2(5) . . ? 
C90 C85 P5 117.2(5) . . ? 
C85 C86 C87 120.3(6) . . ? 
C86 C87 C88 120.7(7) . . ? 
C89 C88 C87 119.4(6) . . ? 
C88 C89 C90 119.9(6) . . ? 
C89 C90 C85 121.5(6) . . ? 
C96 C91 C92 119.4(6) . . ? 
C96 C91 P5 118.7(5) . . ? 
C92 C91 P5 121.9(5) . . ? 
C91 C92 C93 120.4(6) . . ? 
C94 C93 C92 120.2(6) . . ? 
C93 C94 C95 119.7(6) . . ? 
C94 C95 C96 120.2(7) . . ? 
C91 C96 C95 120.0(6) . . ? 
C98 C97 C102 119.2(7) . . ? 
C98 C97 P6 118.1(5) . . ? 
C102 C97 P6 122.6(6) . . ? 
C97 C98 C99 120.8(7) . . ? 
C100 C99 C98 119.8(8) . . ? 
C101 C100 C99 120.1(7) . . ? 
C100 C101 C102 120.4(9) . . ? 
C101 C102 C97 119.6(8) . . ? 
C108 C103 C104 118.5(6) . . ? 
C108 C103 P6 122.6(5) . . ? 
C104 C103 P6 118.9(5) . . ? 
C105 C104 C103 121.2(7) . . ? 
C104 C105 C106 120.4(7) . . ? 
C107 C106 C105 118.9(7) . . ? 
C106 C107 C108 120.7(7) . . ? 
C103 C108 C107 120.4(7) . . ? 
C6S C1S C2S 120.5(9) . . ? 
C1S C2S C3S 119.7(9) . . ? 
C4S C3S C2S 118.7(8) . . ? 
C3S C4S C5S 120.3(9) . . ? 
C6S C5S C4S 119.6(9) . . ? 
C1S C6S C5S 121.2(9) . . ? 
C8S C7S C12S 129.7(14) . . ? 
C7S C8S C9S 116.1(13) . . ? 
C10S C9S C8S 131.1(17) . . ? 
C9S C10S C11S 124.6(17) . . ? 
C12S C11S C10S 122.2(11) . . ? 
C11S C12S C7S 94.1(10) . . ? 
C18S C13S C14S 107.5(14) . . ? 
C13S C14S C15S 124.9(17) . . ? 
C16S C15S C14S 123.9(18) . . ? 
C15S C16S C17S 111.4(17) . . ? 
C18S C17S C16S 109.5(16) . . ? 
C17S C18S C13S 136.9(16) . . ? 
C24S C19S C20S 129(2) . . ? 
C19S C20S C21S 122(2) . . ? 
C22S C21S C20S 129(2) . . ? 
C21S C22S C23S 120.4(15) . . ? 
C24S C23S C22S 110.4(14) . . ? 
C19S C24S C23S 109.2(14) . . ? 
C26S C25S C26S 119.8(13) . 2_556 ? 
C27S C26S C25S 119.1(9) . . ? 
C28S C27S C26S 120.7(9) . . ? 
C27S C28S C27S 120.6(13) 2_556 . ? 
  
_diffrn_measured_fraction_theta_max    0.999 
_diffrn_reflns_theta_full              25.00 
_diffrn_measured_fraction_theta_full   0.999 
_refine_diff_density_max    3.348 
_refine_diff_density_min   -1.670 
_refine_diff_density_rms    0.175 

#===END
 
data_unr05s 
 
_audit_creation_method            SHELXL-97 
_chemical_name_systematic 
; 
 ? 
; 
_chemical_name_common             1�(PF6)2�2CHCl3�2CH2Cl2 
_chemical_melting_point           ? 
_chemical_formula_moiety          ? 
_chemical_formula_sum 
 'C112 H84 Au Cl10 F12 N6 P8 Pd Tl' 
_chemical_formula_weight          2851.85 
 
loop_ 
 _atom_type_symbol 
 _atom_type_description 
 _atom_type_scat_dispersion_real 
 _atom_type_scat_dispersion_imag 
 _atom_type_scat_source 
 'C'  'C'   0.0033   0.0016 
 'International Tables Vol C Tables 4.2.6.8 and 6.1.1.4' 
 'H'  'H'   0.0000   0.0000 
 'International Tables Vol C Tables 4.2.6.8 and 6.1.1.4' 
 'N'  'N'   0.0061   0.0033 
 'International Tables Vol C Tables 4.2.6.8 and 6.1.1.4' 
 'F'  'F'   0.0171   0.0103 
 'International Tables Vol C Tables 4.2.6.8 and 6.1.1.4' 
 'P'  'P'   0.1023   0.0942 
 'International Tables Vol C Tables 4.2.6.8 and 6.1.1.4' 
 'Cl'  'Cl'   0.1484   0.1585 
 'International Tables Vol C Tables 4.2.6.8 and 6.1.1.4' 
 'Tl'  'Tl'  -2.8358   9.6688 
 'International Tables Vol C Tables 4.2.6.8 and 6.1.1.4' 
 'Pd'  'Pd'  -0.9988   1.0072 
 'International Tables Vol C Tables 4.2.6.8 and 6.1.1.4' 
 'Au'  'Au'  -2.0133   8.8022 
 'International Tables Vol C Tables 4.2.6.8 and 6.1.1.4' 
 
_symmetry_cell_setting            ? 
_symmetry_space_group_name_H-M    ? 
 
loop_ 
 _symmetry_equiv_pos_as_xyz 
 'x, y, z' 
 '-x+1/2, y+1/2, -z+1/2' 
 '-x, -y, -z' 
 'x-1/2, -y-1/2, z-1/2' 
 
_cell_length_a                    17.1939(5) 
_cell_length_b                    30.6021(8) 
_cell_length_c                    20.6077(6) 
_cell_angle_alpha                 90.00 
_cell_angle_beta                  90.0200(10) 
_cell_angle_gamma                 90.00 
_cell_volume                      10843.1(5) 
_cell_formula_units_Z             4 
_cell_measurement_temperature     100(2) 
_cell_measurement_reflns_used     ? 
_cell_measurement_theta_min       ? 
_cell_measurement_theta_max       ? 
 
_exptl_crystal_description        block	
_exptl_crystal_colour             red 
_exptl_crystal_size_max           .367 
_exptl_crystal_size_mid           .558
_exptl_crystal_size_min           .63 
_exptl_crystal_density_meas       ? 
_exptl_crystal_density_diffrn     1.747 
_exptl_crystal_density_method     'not measured' 
_exptl_crystal_F_000              5608 
_exptl_absorpt_coefficient_mu     3.434 
_exptl_absorpt_correction_type    SADABS 
_exptl_absorpt_correction_T_min   ? 
_exptl_absorpt_correction_T_max   ? 
_exptl_absorpt_process_details    ? 
 
_exptl_special_details 
; 
 ? 
; 
 
_diffrn_ambient_temperature       100(2) 
_diffrn_radiation_wavelength      0.71073 
_diffrn_radiation_type            MoK\a 
_diffrn_radiation_source          'fine-focus sealed tube' 
_diffrn_radiation_monochromator   graphite 
_diffrn_measurement_device_type   'CCD area detector'
_diffrn_measurement_method        'phi and omega scans' 
_diffrn_detector_area_resol_mean  ? 
_diffrn_standards_number          ? 
_diffrn_standards_interval_count  ? 
_diffrn_standards_interval_time   ? 
_diffrn_standards_decay_%         ? 
_diffrn_reflns_number             114960 
_diffrn_reflns_av_R_equivalents   0.0377 
_diffrn_reflns_av_sigmaI/netI     0.0338 
_diffrn_reflns_limit_h_min        -22 
_diffrn_reflns_limit_h_max        22 
_diffrn_reflns_limit_k_min        -39 
_diffrn_reflns_limit_k_max        39 
_diffrn_reflns_limit_l_min        -26 
_diffrn_reflns_limit_l_max        26 
_diffrn_reflns_theta_min          1.78 
_diffrn_reflns_theta_max          27.50 
_reflns_number_total              24901 
_reflns_number_gt                 23600 
_reflns_threshold_expression      >2sigma(I) 
 
_computing_data_collection        'Bruker SMART' 
_computing_cell_refinement        'Bruker SMART' 
_computing_data_reduction         'Bruker SAINT' 
_computing_structure_solution     'SHELXS-97 (Sheldrick, 1990)' 
_computing_structure_refinement   'SHELXL-97 (Sheldrick, 1997)' 
_computing_molecular_graphics     'Bruker SHELXTL' 
_computing_publication_material   'Bruker SHELXTL' 
 
_refine_special_details 
; 
 Refinement of F^2^ against ALL reflections.  The weighted R-factor wR and 
 goodness of fit S are based on F^2^, conventional R-factors R are based 
 on F, with F set to zero for negative F^2^. The threshold expression of 
 F^2^ > 2sigma(F^2^) is used only for calculating R-factors(gt) etc. and is 
 not relevant to the choice of reflections for refinement.  R-factors based 
 on F^2^ are statistically about twice as large as those based on F, and R- 
 factors based on ALL data will be even larger. 
; 
 
_refine_ls_structure_factor_coef  Fsqd  
_refine_ls_matrix_type            full 
_refine_ls_weighting_scheme       calc  
_refine_ls_weighting_details 
 'calc w=1/[\s^2^(Fo^2^)+(0.0289P)^2^+20.5655P] where P=(Fo^2^+2Fc^2^)/3' 
_atom_sites_solution_primary      direct 
_atom_sites_solution_secondary    difmap 
_atom_sites_solution_hydrogens    geom 
_refine_ls_hydrogen_treatment     mixed 
_refine_ls_extinction_method      none 
_refine_ls_extinction_coef        ? 
_refine_ls_number_reflns          24901 
_refine_ls_number_parameters      1367 
_refine_ls_number_restraints      2 
_refine_ls_R_factor_all           0.1605 
_refine_ls_R_factor_gt            0.1572 
_refine_ls_wR_factor_ref          0.3930 
_refine_ls_wR_factor_gt           0.3925 
_refine_ls_goodness_of_fit_ref    5.671 
_refine_ls_restrained_S_all       5.672 
_refine_ls_shift/su_max           13.397 
_refine_ls_shift/su_mean          0.459 
 
loop_ 
 _atom_site_label 
 _atom_site_type_symbol 
 _atom_site_fract_x 
 _atom_site_fract_y 
 _atom_site_fract_z 
 _atom_site_U_iso_or_equiv 
 _atom_site_adp_type 
 _atom_site_occupancy 
 _atom_site_symmetry_multiplicity 
 _atom_site_calc_flag 
 _atom_site_refinement_flags 
 _atom_site_disorder_assembly 
 _atom_site_disorder_group 
Au1 Au 0.5250(2) 0.17391(13) 0.4251(2) 0.0082(6) Uani 0.481(6) 1 d PD . . 
Au2 Au 0.5220(4) 0.33055(10) 0.5751(3) 0.0107(5) Uani 0.519(6) 1 d PD . . 
Pd1 Pd 0.5119(5) 0.1790(3) 0.4307(5) 0.0082(6) Uani 0.519(6) 1 d PD . . 
Pd2 Pd 0.5205(9) 0.3217(3) 0.5755(7) 0.0107(5) Uani 0.481(6) 1 d PD . . 
Tl1 Tl 0.53184(5) 0.25069(3) 0.50266(5) 0.0370(2) Uani 1 1 d D . . 
P1 P 0.3874(2) 0.16301(14) 0.4430(2) 0.0168(8) Uani 1 1 d . . . 
P2 P 0.5787(2) 0.30020(14) 0.6699(2) 0.0163(8) Uani 1 1 d . . . 
P3 P 0.6071(2) 0.13552(14) 0.4949(2) 0.0184(8) Uani 1 1 d . . . 
P4 P 0.6086(2) 0.36744(14) 0.5093(2) 0.0184(8) Uani 1 1 d . . . 
P5 P 0.5788(2) 0.20219(14) 0.3321(2) 0.0160(8) Uani 1 1 d . . . 
P6 P 0.3884(2) 0.33692(12) 0.5627(2) 0.0137(8) Uani 1 1 d . . . 
P7 P 0.5641(3) 0.38487(16) 0.0573(2) 0.0233(9) Uani 1 1 d . . . 
P8 P 0.5634(3) 0.11668(16) 0.9406(2) 0.0238(10) Uani 1 1 d . . . 
N1 N 0.4101(8) 0.1731(5) 0.5699(7) 0.022(3) Uani 1 1 d . . . 
N2 N 0.4954(8) 0.2267(4) 0.6567(6) 0.013(3) Uani 1 1 d . . . 
N3 N 0.7009(8) 0.2064(5) 0.5015(8) 0.022(3) Uani 1 1 d . . . 
N4 N 0.7015(8) 0.2971(5) 0.5076(8) 0.023(3) Uani 1 1 d . . . 
N5 N 0.4952(8) 0.2767(5) 0.3471(7) 0.021(3) Uani 1 1 d . . . 
N6 N 0.4109(8) 0.3232(4) 0.4359(7) 0.015(3) Uani 1 1 d . . . 
F1 F 0.4879(8) 0.3690(5) 0.0931(7) 0.058(4) Uani 1 1 d . . . 
F2 F 0.5231(11) 0.4300(6) 0.0377(10) 0.096(6) Uani 1 1 d . . . 
F3 F 0.5294(11) 0.3654(7) -0.0096(7) 0.091(6) Uani 1 1 d . . . 
F4 F 0.6385(8) 0.4020(6) 0.0193(9) 0.074(5) Uani 1 1 d . . . 
F5 F 0.6041(11) 0.3396(6) 0.0733(12) 0.104(7) Uani 1 1 d . . . 
F6 F 0.5994(13) 0.4047(7) 0.1196(9) 0.093(6) Uani 1 1 d . . . 
F7 F 0.4888(9) 0.1439(7) 0.9164(8) 0.075(5) Uani 1 1 d . . . 
F8 F 0.5120(9) 0.0902(6) 0.9864(8) 0.069(4) Uani 1 1 d . . . 
F9 F 0.5395(12) 0.0846(6) 0.8798(9) 0.081(5) Uani 1 1 d . . . 
F10 F 0.6371(8) 0.0892(5) 0.9615(9) 0.071(5) Uani 1 1 d . . . 
F11 F 0.6154(10) 0.1441(5) 0.8906(10) 0.077(5) Uani 1 1 d . . . 
F12 F 0.5830(16) 0.1509(6) 0.9935(10) 0.107(8) Uani 1 1 d . . . 
C1 C 0.3658(9) 0.1544(5) 0.5274(9) 0.019(3) Uani 1 1 d . . . 
C2 C 0.3102(10) 0.1223(6) 0.5482(10) 0.023(4) Uani 1 1 d . . . 
H2 H 0.2798 0.1067 0.5174 0.028 Uiso 1 1 calc R . . 
C3 C 0.3015(10) 0.1145(5) 0.6128(10) 0.022(4) Uani 1 1 d . . . 
H3 H 0.2633 0.0944 0.6276 0.027 Uiso 1 1 calc R . . 
C4 C 0.3511(9) 0.1371(6) 0.6592(9) 0.022(4) Uani 1 1 d . . . 
C5 C 0.4034(9) 0.1681(5) 0.6329(8) 0.017(3) Uani 1 1 d . . . 
C6 C 0.4522(9) 0.1904(5) 0.6785(9) 0.018(3) Uani 1 1 d . . . 
C7 C 0.4499(10) 0.1800(6) 0.7455(10) 0.026(4) Uani 1 1 d . . . 
C8 C 0.4973(11) 0.2023(6) 0.7892(9) 0.025(4) Uani 1 1 d . . . 
H8 H 0.5007 0.1936 0.8334 0.030 Uiso 1 1 calc R . . 
C9 C 0.5397(11) 0.2380(6) 0.7659(8) 0.025(4) Uani 1 1 d . . . 
H9 H 0.5715 0.2544 0.7947 0.030 Uiso 1 1 calc R . . 
C10 C 0.5353(9) 0.2497(6) 0.7006(8) 0.017(3) Uani 1 1 d . . . 
C11 C 0.3484(11) 0.1252(6) 0.7263(10) 0.028(4) Uani 1 1 d . . . 
H11 H 0.3135 0.1035 0.7418 0.033 Uiso 1 1 calc R . . 
C12 C 0.3980(10) 0.1463(6) 0.7669(10) 0.029(4) Uani 1 1 d . . . 
H12 H 0.3983 0.1384 0.8115 0.035 Uiso 1 1 calc R . . 
C13 C 0.7014(10) 0.1626(6) 0.4987(10) 0.024(4) Uani 1 1 d . . . 
C14 C 0.7716(11) 0.1377(6) 0.5010(11) 0.033(4) Uani 1 1 d . . . 
H14 H 0.7703 0.1067 0.4989 0.039 Uiso 1 1 calc R . . 
C15 C 0.8405(11) 0.1593(6) 0.5064(13) 0.042(6) Uani 1 1 d . . . 
H15 H 0.8877 0.1433 0.5093 0.050 Uiso 1 1 calc R . . 
C16 C 0.8418(12) 0.2057(7) 0.5076(14) 0.049(6) Uani 1 1 d . . . 
C17 C 0.7699(10) 0.2277(6) 0.5081(10) 0.029(4) Uani 1 1 d . . . 
C18 C 0.7703(11) 0.2746(6) 0.5100(9) 0.025(4) Uani 1 1 d . . . 
C19 C 0.8427(12) 0.2984(7) 0.5108(12) 0.040(5) Uani 1 1 d . . . 
C20 C 0.8429(12) 0.3424(7) 0.5126(11) 0.035(4) Uani 1 1 d . . . 
H20 H 0.8905 0.3580 0.5158 0.042 Uiso 1 1 calc R . . 
C21 C 0.7748(11) 0.3639(6) 0.5100(10) 0.031(4) Uani 1 1 d . . . 
H21 H 0.7742 0.3949 0.5089 0.037 Uiso 1 1 calc R . . 
C22 C 0.7060(10) 0.3409(5) 0.5088(9) 0.023(4) Uani 1 1 d . . . 
C23 C 0.9125(13) 0.2301(8) 0.5131(14) 0.050(6) Uani 1 1 d . . . 
H23 H 0.9603 0.2146 0.5151 0.060 Uiso 1 1 calc R . . 
C24 C 0.9146(13) 0.2731(7) 0.5155(14) 0.049(6) Uani 1 1 d . . . 
H24 H 0.9630 0.2877 0.5203 0.059 Uiso 1 1 calc R . . 
C25 C 0.5355(10) 0.2552(5) 0.3042(10) 0.024(4) Uani 1 1 d . . . 
C26 C 0.5419(11) 0.2666(6) 0.2367(10) 0.028(4) Uani 1 1 d . . . 
H26 H 0.5748 0.2507 0.2082 0.034 Uiso 1 1 calc R . . 
C27 C 0.4996(11) 0.3006(6) 0.2155(9) 0.026(4) Uani 1 1 d . . . 
H27 H 0.5031 0.3095 0.1715 0.031 Uiso 1 1 calc R . . 
C28 C 0.4508(11) 0.3226(6) 0.2581(9) 0.023(4) Uani 1 1 d . . . 
C29 C 0.4526(10) 0.3107(5) 0.3254(9) 0.021(4) Uani 1 1 d . . . 
C30 C 0.4040(9) 0.3344(5) 0.3705(8) 0.015(3) Uani 1 1 d . . . 
C31 C 0.3499(10) 0.3656(6) 0.3477(8) 0.021(3) Uani 1 1 d . . . 
C32 C 0.2984(10) 0.3837(6) 0.3919(9) 0.024(4) Uani 1 1 d . . . 
H32 H 0.2578 0.4023 0.3773 0.029 Uiso 1 1 calc R . . 
C33 C 0.3059(10) 0.3750(6) 0.4556(10) 0.026(4) Uani 1 1 d . . . 
H33 H 0.2715 0.3878 0.4862 0.032 Uiso 1 1 calc R . . 
C34 C 0.3642(9) 0.3473(5) 0.4756(8) 0.017(3) Uani 1 1 d . . . 
C35 C 0.3989(11) 0.3561(6) 0.2364(9) 0.026(4) Uani 1 1 d . . . 
H35 H 0.3989 0.3652 0.1923 0.032 Uiso 1 1 calc R . . 
C36 C 0.3504(10) 0.3744(5) 0.2791(9) 0.020(3) Uani 1 1 d . . . 
H36 H 0.3134 0.3948 0.2630 0.024 Uiso 1 1 calc R . . 
C37 C 0.3638(10) 0.1110(5) 0.4048(8) 0.020(3) Uani 1 1 d . . . 
C38 C 0.4113(13) 0.0747(6) 0.4189(11) 0.033(5) Uani 1 1 d . . . 
H38 H 0.4515 0.0773 0.4503 0.039 Uiso 1 1 calc R . . 
C39 C 0.4000(15) 0.0354(7) 0.3874(12) 0.043(6) Uani 1 1 d . . . 
H39 H 0.4296 0.0105 0.3995 0.051 Uiso 1 1 calc R . . 
C40 C 0.349(2) 0.0327(8) 0.3414(12) 0.069(9) Uani 1 1 d . . . 
H40 H 0.3458 0.0063 0.3173 0.083 Uiso 1 1 calc R . . 
C41 C 0.3017(19) 0.0650(8) 0.3264(14) 0.057(7) Uani 1 1 d . . . 
H41 H 0.2629 0.0600 0.2945 0.068 Uiso 1 1 calc R . . 
C42 C 0.3061(14) 0.1066(7) 0.3557(11) 0.033(5) Uani 1 1 d . . . 
H42 H 0.2728 0.1301 0.3436 0.040 Uiso 1 1 calc R . . 
C43 C 0.3102(11) 0.1989(6) 0.4177(10) 0.030(4) Uani 1 1 d . . . 
C44 C 0.2333(15) 0.1945(11) 0.4451(12) 0.065(8) Uani 1 1 d . . . 
H44 H 0.2247 0.1730 0.4776 0.079 Uiso 1 1 calc R . . 
C45 C 0.173(2) 0.2202(11) 0.4257(13) 0.076(9) Uani 1 1 d . . . 
H45 H 0.1202 0.2149 0.4381 0.091 Uiso 1 1 calc R . . 
C46 C 0.196(2) 0.2569(8) 0.3836(18) 0.082(11) Uani 1 1 d . . . 
H46 H 0.1616 0.2809 0.3798 0.099 Uiso 1 1 calc R . . 
C47 C 0.268(2) 0.2588(9) 0.348(2) 0.102(15) Uani 1 1 d . . . 
H47 H 0.2760 0.2778 0.3126 0.122 Uiso 1 1 calc R . . 
C48 C 0.3245(16) 0.2295(8) 0.3724(19) 0.093(12) Uani 1 1 d . . . 
H48 H 0.3758 0.2316 0.3556 0.111 Uiso 1 1 calc R . . 
C49 C 0.5610(11) 0.3373(6) 0.7383(9) 0.025(4) Uani 1 1 d . . . 
C50 C 0.4981(10) 0.3651(5) 0.7347(8) 0.017(3) Uani 1 1 d . . . 
H50 H 0.4669 0.3651 0.6966 0.020 Uiso 1 1 calc R . . 
C51 C 0.4792(10) 0.3931(6) 0.7852(8) 0.021(3) Uani 1 1 d . . . 
H51 H 0.4338 0.4107 0.7830 0.025 Uiso 1 1 calc R . . 
C52 C 0.5284(11) 0.3950(7) 0.8400(9) 0.029(4) Uani 1 1 d . . . 
H52 H 0.5168 0.4143 0.8747 0.035 Uiso 1 1 calc R . . 
C53 C 0.5917(12) 0.3693(8) 0.8427(10) 0.039(5) Uani 1 1 d . . . 
H53 H 0.6252 0.3711 0.8793 0.047 Uiso 1 1 calc R . . 
C54 C 0.6096(10) 0.3395(6) 0.7916(9) 0.024(4) Uani 1 1 d . . . 
H54 H 0.6544 0.3214 0.7941 0.029 Uiso 1 1 calc R . . 
C55 C 0.6824(10) 0.2904(6) 0.6742(9) 0.023(4) Uani 1 1 d . . . 
C56 C 0.7340(11) 0.3245(7) 0.6746(9) 0.028(4) Uani 1 1 d . . . 
H56 H 0.7135 0.3533 0.6741 0.034 Uiso 1 1 calc R . . 
C57 C 0.8144(12) 0.3196(8) 0.6755(12) 0.039(5) Uani 1 1 d . . . 
H57 H 0.8486 0.3439 0.6732 0.047 Uiso 1 1 calc R . . 
C58 C 0.8424(15) 0.2761(11) 0.6799(16) 0.073(8) Uani 1 1 d . . . 
H58 H 0.8963 0.2709 0.6866 0.088 Uiso 1 1 calc R . . 
C59 C 0.7912(16) 0.2407(9) 0.6746(19) 0.074(9) Uani 1 1 d . . . 
H59 H 0.8107 0.2118 0.6707 0.089 Uiso 1 1 calc R . . 
C60 C 0.7125(13) 0.2482(7) 0.6752(14) 0.046(6) Uani 1 1 d . . . 
H60 H 0.6778 0.2240 0.6762 0.055 Uiso 1 1 calc R . . 
C61 C 0.6265(9) 0.0823(5) 0.4570(9) 0.020(3) Uani 1 1 d . . . 
C62 C 0.6505(11) 0.0447(6) 0.4921(10) 0.024(4) Uani 1 1 d . . . 
H62 H 0.6590 0.0462 0.5376 0.029 Uiso 1 1 calc R . . 
C63 C 0.6612(11) 0.0066(6) 0.4593(10) 0.028(4) Uani 1 1 d . . . 
H63 H 0.6797 -0.0182 0.4823 0.033 Uiso 1 1 calc R . . 
C64 C 0.6460(14) 0.0027(8) 0.3941(11) 0.045(6) Uani 1 1 d . . . 
H64 H 0.6507 -0.0249 0.3732 0.054 Uiso 1 1 calc R . . 
C65 C 0.6235(17) 0.0398(8) 0.3586(13) 0.059(7) Uani 1 1 d . . . 
H65 H 0.6151 0.0384 0.3130 0.071 Uiso 1 1 calc R . . 
C66 C 0.6136(12) 0.0796(7) 0.3936(11) 0.035(5) Uani 1 1 d . . . 
H66 H 0.5972 0.1050 0.3709 0.042 Uiso 1 1 calc R . . 
C67 C 0.5931(10) 0.1222(5) 0.5791(9) 0.021(3) Uani 1 1 d . . . 
C68 C 0.6393(13) 0.1368(6) 0.6291(10) 0.032(4) Uani 1 1 d . . . 
H68 H 0.6808 0.1562 0.6197 0.038 Uiso 1 1 calc R . . 
C69 C 0.6272(14) 0.1240(7) 0.6930(11) 0.038(5) Uani 1 1 d . . . 
H69 H 0.6599 0.1352 0.7263 0.045 Uiso 1 1 calc R . . 
C70 C 0.5681(11) 0.0952(6) 0.7086(9) 0.028(4) Uani 1 1 d . . . 
H70 H 0.5596 0.0873 0.7525 0.033 Uiso 1 1 calc R . . 
C71 C 0.5199(12) 0.0776(5) 0.6590(10) 0.027(4) Uani 1 1 d . . . 
H71 H 0.4804 0.0569 0.6689 0.032 Uiso 1 1 calc R . . 
C72 C 0.5325(10) 0.0915(6) 0.5952(9) 0.020(3) Uani 1 1 d . . . 
H72 H 0.5003 0.0805 0.5616 0.024 Uiso 1 1 calc R . . 
C73 C 0.6253(10) 0.4218(5) 0.5460(8) 0.017(3) Uani 1 1 d . . . 
C74 C 0.6098(11) 0.4258(6) 0.6120(8) 0.026(4) Uani 1 1 d . . . 
H74 H 0.5923 0.4012 0.6360 0.031 Uiso 1 1 calc R . . 
C75 C 0.6198(14) 0.4658(7) 0.6428(10) 0.038(5) Uani 1 1 d . . . 
H75 H 0.6096 0.4682 0.6879 0.045 Uiso 1 1 calc R . . 
C76 C 0.6443(12) 0.5022(7) 0.6089(12) 0.036(5) Uani 1 1 d . . . 
H76 H 0.6505 0.5294 0.6304 0.043 Uiso 1 1 calc R . . 
C77 C 0.6600(11) 0.4983(6) 0.5420(11) 0.027(4) Uani 1 1 d . . . 
H77 H 0.6760 0.5233 0.5180 0.033 Uiso 1 1 calc R . . 
C78 C 0.6521(10) 0.4579(5) 0.5105(9) 0.021(3) Uani 1 1 d . . . 
H78 H 0.6647 0.4550 0.4658 0.025 Uiso 1 1 calc R . . 
C79 C 0.5954(10) 0.3818(5) 0.4223(8) 0.016(3) Uani 1 1 d . . . 
C80 C 0.5354(10) 0.4093(6) 0.4050(9) 0.023(4) Uani 1 1 d . . . 
H80 H 0.5013 0.4206 0.4372 0.027 Uiso 1 1 calc R . . 
C81 C 0.5251(11) 0.4204(6) 0.3402(9) 0.030(4) Uani 1 1 d . . . 
H81 H 0.4825 0.4385 0.3282 0.036 Uiso 1 1 calc R . . 
C82 C 0.5755(12) 0.4058(6) 0.2929(9) 0.027(4) Uani 1 1 d . . . 
H82 H 0.5704 0.4153 0.2492 0.032 Uiso 1 1 calc R . . 
C83 C 0.6339(14) 0.3769(7) 0.3107(10) 0.036(5) Uani 1 1 d . . . 
H83 H 0.6662 0.3642 0.2784 0.044 Uiso 1 1 calc R . . 
C84 C 0.6453(11) 0.3666(6) 0.3751(10) 0.027(4) Uani 1 1 d . . . 
H84 H 0.6881 0.3487 0.3872 0.033 Uiso 1 1 calc R . . 
C85 C 0.5637(9) 0.1645(6) 0.2646(9) 0.022(4) Uani 1 1 d . . . 
C86 C 0.6114(12) 0.1649(8) 0.2082(10) 0.037(5) Uani 1 1 d . . . 
H86 H 0.6564 0.1828 0.2067 0.044 Uiso 1 1 calc R . . 
C87 C 0.5925(13) 0.1396(8) 0.1567(11) 0.038(5) Uani 1 1 d . . . 
H87 H 0.6229 0.1412 0.1183 0.045 Uiso 1 1 calc R . . 
C88 C 0.5288(13) 0.1111(7) 0.1589(11) 0.036(5) Uani 1 1 d . . . 
H88 H 0.5154 0.0941 0.1220 0.043 Uiso 1 1 calc R . . 
C89 C 0.4852(12) 0.1080(7) 0.2158(10) 0.034(4) Uani 1 1 d . . . 
H89 H 0.4461 0.0862 0.2201 0.041 Uiso 1 1 calc R . . 
C90 C 0.4999(11) 0.1371(7) 0.2661(10) 0.030(4) Uani 1 1 d . . . 
H90 H 0.4655 0.1382 0.3020 0.037 Uiso 1 1 calc R . . 
C91 C 0.6835(10) 0.2124(6) 0.3320(9) 0.023(4) Uani 1 1 d . . . 
C92 C 0.7122(14) 0.2537(7) 0.3428(13) 0.046(6) Uani 1 1 d . . . 
H92 H 0.6778 0.2780 0.3431 0.056 Uiso 1 1 calc R . . 
C93 C 0.7918(14) 0.2602(8) 0.3534(14) 0.049(6) Uani 1 1 d . . . 
H93 H 0.8112 0.2879 0.3667 0.059 Uiso 1 1 calc R . . 
C94 C 0.8416(15) 0.2248(10) 0.3438(15) 0.059(7) Uani 1 1 d . . . 
H94 H 0.8963 0.2295 0.3450 0.071 Uiso 1 1 calc R . . 
C95 C 0.8143(12) 0.1843(8) 0.3330(13) 0.044(6) Uani 1 1 d . . . 
H95 H 0.8491 0.1604 0.3279 0.053 Uiso 1 1 calc R . . 
C96 C 0.7363(11) 0.1779(7) 0.3296(11) 0.033(5) Uani 1 1 d . . . 
H96 H 0.7170 0.1490 0.3256 0.039 Uiso 1 1 calc R . . 
C97 C 0.3591(10) 0.3888(6) 0.6004(8) 0.023(4) Uani 1 1 d . . . 
C98 C 0.4053(13) 0.4245(6) 0.5886(12) 0.038(5) Uani 1 1 d . . . 
H98 H 0.4479 0.4221 0.5594 0.046 Uiso 1 1 calc R . . 
C99 C 0.390(2) 0.4636(7) 0.6188(14) 0.068(9) Uani 1 1 d . . . 
H99 H 0.4222 0.4882 0.6103 0.081 Uiso 1 1 calc R . . 
C100 C 0.329(2) 0.4676(7) 0.6608(13) 0.071(10) Uani 1 1 d . . . 
H100 H 0.3192 0.4948 0.6816 0.085 Uiso 1 1 calc R . . 
C101 C 0.282(2) 0.4316(9) 0.6730(14) 0.068(9) Uani 1 1 d . . . 
H101 H 0.2394 0.4341 0.7017 0.081 Uiso 1 1 calc R . . 
C102 C 0.2987(15) 0.3917(7) 0.6429(10) 0.038(5) Uani 1 1 d . . . 
H102 H 0.2678 0.3667 0.6521 0.046 Uiso 1 1 calc R . . 
C103 C 0.3178(10) 0.2973(6) 0.5905(9) 0.024(4) Uani 1 1 d . . . 
C104 C 0.2544(14) 0.2837(8) 0.5571(12) 0.049(6) Uani 1 1 d . . . 
H104 H 0.2431 0.2959 0.5158 0.059 Uiso 1 1 calc R . . 
C105 C 0.2045(19) 0.2510(9) 0.5836(14) 0.067(8) Uani 1 1 d . . . 
H105 H 0.1593 0.2422 0.5605 0.081 Uiso 1 1 calc R . . 
C106 C 0.2216(17) 0.2320(7) 0.6424(12) 0.056(7) Uani 1 1 d . . . 
H106 H 0.1902 0.2089 0.6585 0.068 Uiso 1 1 calc R . . 
C107 C 0.2830(14) 0.2463(7) 0.6771(12) 0.045(5) Uani 1 1 d . . . 
H107 H 0.2933 0.2343 0.7188 0.054 Uiso 1 1 calc R . . 
C108 C 0.3302(12) 0.2780(8) 0.6523(12) 0.047(5) Uani 1 1 d . . . 
H108 H 0.3733 0.2876 0.6775 0.056 Uiso 1 1 calc R . . 
C1S C 0.3802(13) 0.4684(6) 0.1169(10) 0.032(4) Uani 1 1 d . . . 
H1S H 0.4146 0.4482 0.0917 0.039 Uiso 1 1 calc R . . 
C2S C 0.3866(13) 0.0303(8) 0.8848(10) 0.037(5) Uani 1 1 d . . . 
H2S H 0.4268 0.0495 0.9053 0.045 Uiso 1 1 calc R . . 
C3S C 0.8621(18) 0.0033(9) 0.3903(17) 0.068(8) Uani 1 1 d . . . 
H3S1 H 0.9174 -0.0049 0.3954 0.082 Uiso 1 1 calc R . . 
H3S2 H 0.8312 -0.0151 0.4203 0.082 Uiso 1 1 calc R . . 
C4S C 0.8567(19) 0.4985(9) 0.6199(19) 0.075(10) Uani 1 1 d . . . 
H4S1 H 0.8360 0.5124 0.5802 0.089 Uiso 1 1 calc R . . 
H4S2 H 0.9139 0.5023 0.6206 0.089 Uiso 1 1 calc R . . 
Cl1 Cl 0.2945(3) 0.43937(18) 0.1344(3) 0.0453(13) Uani 1 1 d . . . 
Cl2 Cl 0.3644(5) 0.5137(2) 0.0687(3) 0.0554(17) Uani 1 1 d . . . 
Cl3 Cl 0.4299(4) 0.4815(3) 0.1874(3) 0.0638(19) Uani 1 1 d . . . 
Cl4 Cl 0.3010(4) 0.06173(18) 0.8742(3) 0.0484(15) Uani 1 1 d . . . 
Cl5 Cl 0.3702(5) -0.0137(2) 0.9366(3) 0.0583(17) Uani 1 1 d . . . 
Cl6 Cl 0.4234(5) 0.0121(2) 0.8099(3) 0.0633(19) Uani 1 1 d . . . 
Cl7 Cl 0.8342(7) -0.0068(4) 0.3141(4) 0.114(4) Uani 1 1 d . . . 
Cl8 Cl 0.8506(6) 0.0582(2) 0.4121(6) 0.119(4) Uani 1 1 d . . . 
Cl9 Cl 0.8335(6) 0.4434(2) 0.6207(5) 0.096(3) Uani 1 1 d . . . 
Cl10 Cl 0.8125(6) 0.5241(2) 0.6933(4) 0.078(2) Uani 1 1 d . . . 
 
loop_ 
 _atom_site_aniso_label 
 _atom_site_aniso_U_11 
 _atom_site_aniso_U_22 
 _atom_site_aniso_U_33 
 _atom_site_aniso_U_23 
 _atom_site_aniso_U_13 
 _atom_site_aniso_U_12 
Au1 0.0010(14) 0.0089(11) 0.0146(10) -0.0003(7) 0.0066(9) 0.0078(8) 
Au2 0.0154(6) 0.0000(15) 0.0168(5) 0.0042(11) 0.0009(4) 0.0013(12) 
Pd1 0.0010(14) 0.0089(11) 0.0146(10) -0.0003(7) 0.0066(9) 0.0078(8) 
Pd2 0.0154(6) 0.0000(15) 0.0168(5) 0.0042(11) 0.0009(4) 0.0013(12) 
Tl1 0.0264(4) 0.0370(5) 0.0475(5) 0.0113(4) -0.0004(3) 0.0004(3) 
P1 0.0156(19) 0.018(2) 0.017(2) -0.0030(16) 0.0030(16) 0.0001(15) 
P2 0.0143(19) 0.0151(19) 0.019(2) 0.0050(16) -0.0014(15) -0.0018(15) 
P3 0.0165(19) 0.0133(19) 0.025(2) 0.0053(17) 0.0010(16) -0.0006(15) 
P4 0.0166(19) 0.020(2) 0.019(2) 0.0076(16) 0.0052(16) 0.0034(16) 
P5 0.0149(19) 0.0149(19) 0.018(2) 0.0028(16) 0.0047(15) 0.0008(15) 
P6 0.0131(18) 0.0040(17) 0.024(2) -0.0011(15) 0.0079(15) 0.0009(14) 
P7 0.018(2) 0.027(2) 0.024(2) 0.0024(19) 0.0007(17) 0.0014(18) 
P8 0.021(2) 0.023(2) 0.027(2) -0.0028(19) 0.0001(18) 0.0000(18) 
N1 0.017(6) 0.026(8) 0.022(7) -0.011(6) -0.003(5) 0.001(6) 
N2 0.019(6) 0.013(6) 0.009(6) 0.001(5) -0.005(5) -0.001(5) 
N3 0.009(6) 0.018(7) 0.039(9) 0.007(6) 0.005(6) -0.002(5) 
N4 0.019(7) 0.013(7) 0.036(9) 0.010(6) 0.004(6) -0.003(5) 
N5 0.010(6) 0.033(8) 0.020(7) -0.006(6) 0.001(5) -0.002(5) 
N6 0.018(6) 0.007(6) 0.019(7) 0.015(5) -0.009(5) 0.005(5) 
F1 0.039(7) 0.088(10) 0.047(7) 0.053(7) 0.012(6) 0.000(7) 
F2 0.082(11) 0.071(10) 0.135(15) 0.075(10) 0.052(11) 0.048(9) 
F3 0.121(13) 0.129(15) 0.022(7) 0.000(8) 0.001(8) -0.075(12) 
F4 0.028(7) 0.074(10) 0.121(13) 0.045(10) -0.005(7) -0.005(7) 
F5 0.076(12) 0.054(10) 0.182(18) 0.060(11) 0.040(12) 0.043(9) 
F6 0.127(15) 0.094(14) 0.058(11) -0.010(10) -0.023(10) -0.029(12) 
F7 0.046(9) 0.120(14) 0.059(9) 0.054(9) 0.005(7) 0.009(9) 
F8 0.061(9) 0.089(12) 0.056(9) 0.047(8) -0.006(7) -0.009(8) 
F9 0.111(13) 0.057(10) 0.075(11) -0.020(9) 0.003(10) -0.022(10) 
F10 0.025(7) 0.069(9) 0.117(13) 0.063(9) 0.004(7) 0.008(6) 
F11 0.063(10) 0.053(9) 0.116(14) 0.042(9) -0.010(9) -0.009(8) 
F12 0.20(2) 0.043(10) 0.084(13) -0.025(9) -0.028(14) 0.011(12) 
C1 0.014(7) 0.001(6) 0.043(10) -0.004(6) 0.001(7) 0.005(6) 
C2 0.015(8) 0.022(8) 0.033(10) -0.008(7) 0.002(7) -0.011(7) 
C3 0.016(8) 0.000(6) 0.051(12) -0.004(7) 0.008(7) 0.000(6) 
C4 0.010(7) 0.020(8) 0.038(10) 0.000(7) 0.013(7) 0.002(6) 
C5 0.017(7) 0.012(7) 0.022(8) 0.006(6) -0.004(6) 0.002(6) 
C6 0.007(7) 0.014(8) 0.032(10) 0.003(7) 0.001(6) 0.004(6) 
C7 0.016(8) 0.029(9) 0.034(10) 0.015(8) -0.009(7) 0.002(7) 
C8 0.034(9) 0.023(9) 0.018(8) 0.006(7) -0.010(7) -0.006(7) 
C9 0.027(9) 0.035(9) 0.014(8) 0.010(7) -0.006(7) -0.011(7) 
C10 0.016(7) 0.027(9) 0.010(7) -0.002(6) -0.002(6) -0.014(6) 
C11 0.023(9) 0.016(8) 0.044(12) 0.003(8) 0.010(8) -0.002(7) 
C12 0.021(8) 0.032(10) 0.034(10) 0.021(8) 0.006(7) 0.001(7) 
C13 0.015(8) 0.015(8) 0.041(10) 0.002(7) -0.010(7) 0.001(6) 
C14 0.024(9) 0.011(8) 0.064(13) 0.024(8) 0.002(8) -0.002(7) 
C15 0.017(9) 0.011(9) 0.097(18) 0.014(10) -0.009(10) 0.009(7) 
C16 0.028(10) 0.016(9) 0.104(18) 0.010(10) -0.024(11) 0.004(8) 
C17 0.014(8) 0.022(9) 0.050(11) 0.017(8) 0.001(7) -0.008(7) 
C18 0.028(9) 0.011(8) 0.038(10) 0.007(7) 0.008(7) -0.009(7) 
C19 0.024(10) 0.030(11) 0.068(15) 0.000(10) -0.008(9) -0.003(8) 
C20 0.027(10) 0.029(10) 0.050(12) 0.007(9) 0.004(8) -0.002(8) 
C21 0.029(10) 0.022(9) 0.041(11) 0.000(8) 0.009(8) -0.003(8) 
C22 0.018(8) 0.013(7) 0.038(10) 0.018(7) 0.001(7) 0.004(6) 
C23 0.024(10) 0.040(12) 0.085(19) 0.013(12) -0.008(11) 0.000(9) 
C24 0.031(11) 0.023(10) 0.093(19) 0.004(11) -0.005(11) 0.004(8) 
C25 0.016(8) 0.008(7) 0.050(11) 0.004(7) 0.010(7) 0.001(6) 
C26 0.021(9) 0.013(8) 0.050(11) -0.006(7) 0.011(8) -0.002(7) 
C27 0.030(10) 0.030(10) 0.017(8) 0.005(7) 0.003(7) 0.004(8) 
C28 0.032(9) 0.021(9) 0.017(9) -0.005(7) 0.011(7) 0.000(7) 
C29 0.017(8) 0.018(8) 0.027(9) 0.017(7) 0.007(7) -0.004(6) 
C30 0.008(7) 0.010(7) 0.029(8) 0.000(6) -0.001(6) -0.004(5) 
C31 0.023(8) 0.017(8) 0.023(8) 0.001(6) 0.003(6) -0.002(6) 
C32 0.022(8) 0.026(9) 0.025(10) -0.004(7) -0.021(7) 0.003(7) 
C33 0.023(9) 0.018(8) 0.038(10) -0.007(7) -0.015(7) 0.006(7) 
C34 0.016(7) 0.022(8) 0.013(7) -0.005(6) -0.005(6) 0.009(6) 
C35 0.031(9) 0.021(9) 0.027(10) 0.011(7) 0.006(7) -0.004(7) 
C36 0.021(8) 0.013(8) 0.025(9) 0.008(7) -0.005(7) -0.002(6) 
C37 0.029(8) 0.007(7) 0.025(9) 0.006(6) 0.009(7) -0.006(6) 
C38 0.048(12) 0.012(8) 0.038(11) 0.004(8) 0.029(9) 0.008(8) 
C39 0.060(14) 0.027(11) 0.042(13) 0.003(10) 0.025(11) -0.008(10) 
C40 0.16(3) 0.032(12) 0.019(12) -0.013(10) 0.016(15) -0.030(15) 
C41 0.09(2) 0.027(13) 0.051(16) -0.016(11) -0.009(14) -0.014(13) 
C42 0.054(13) 0.014(9) 0.032(11) -0.007(8) 0.004(9) -0.008(9) 
C43 0.021(9) 0.015(8) 0.053(12) -0.020(8) -0.021(8) 0.007(7) 
C44 0.056(14) 0.11(2) 0.029(12) 0.012(13) -0.017(10) 0.050(14) 
C45 0.10(2) 0.09(2) 0.032(13) -0.013(14) -0.025(13) 0.061(18) 
C46 0.09(2) 0.025(12) 0.13(3) -0.048(15) -0.07(2) 0.035(14) 
C47 0.11(3) 0.031(14) 0.16(3) 0.046(17) -0.10(3) -0.031(16) 
C48 0.049(14) 0.036(13) 0.19(3) 0.078(17) -0.074(18) -0.037(11) 
C49 0.034(9) 0.023(9) 0.018(8) -0.006(7) -0.003(7) 0.006(7) 
C50 0.030(9) 0.007(7) 0.014(8) 0.007(6) -0.005(6) -0.010(6) 
C51 0.021(8) 0.022(9) 0.020(8) 0.005(7) 0.001(7) -0.001(7) 
C52 0.028(9) 0.046(12) 0.014(9) -0.002(8) 0.003(7) -0.011(8) 
C53 0.037(11) 0.064(15) 0.017(9) -0.022(10) -0.012(8) 0.007(10) 
C54 0.016(8) 0.035(10) 0.021(9) -0.002(7) 0.003(7) 0.002(7) 
C55 0.018(8) 0.030(9) 0.020(9) 0.017(7) -0.003(7) 0.005(7) 
C56 0.022(9) 0.040(11) 0.023(9) 0.008(8) 0.001(7) 0.007(8) 
C57 0.024(10) 0.044(13) 0.050(14) 0.016(11) -0.003(9) -0.008(9) 
C58 0.025(12) 0.09(2) 0.11(2) 0.022(18) -0.017(13) -0.014(13) 
C59 0.047(15) 0.030(13) 0.15(3) 0.025(15) 0.004(16) 0.013(11) 
C60 0.030(11) 0.020(10) 0.086(18) 0.016(10) -0.009(11) 0.002(8) 
C61 0.012(7) 0.012(7) 0.036(10) 0.009(7) 0.005(7) 0.004(6) 
C62 0.031(9) 0.014(8) 0.027(9) 0.002(7) -0.002(7) -0.006(7) 
C63 0.032(10) 0.018(9) 0.032(11) 0.007(8) -0.002(8) 0.003(7) 
C64 0.049(13) 0.051(13) 0.034(12) -0.008(10) -0.008(10) 0.028(11) 
C65 0.080(18) 0.054(14) 0.043(14) -0.030(12) 0.002(12) 0.047(13) 
C66 0.039(11) 0.026(10) 0.041(11) 0.007(8) 0.004(9) 0.020(8) 
C67 0.026(8) 0.011(7) 0.025(9) 0.007(6) 0.002(7) -0.009(6) 
C68 0.047(12) 0.017(9) 0.031(11) 0.006(8) -0.002(9) -0.006(8) 
C69 0.051(13) 0.032(11) 0.031(11) 0.003(9) -0.020(10) 0.000(10) 
C70 0.038(10) 0.027(9) 0.019(9) 0.013(7) -0.001(7) 0.018(8) 
C71 0.048(11) 0.000(7) 0.033(10) -0.007(7) -0.014(8) 0.005(7) 
C72 0.025(8) 0.013(8) 0.021(9) 0.004(7) -0.003(7) 0.004(7) 
C73 0.026(8) 0.011(7) 0.015(8) -0.005(6) -0.003(6) 0.001(6) 
C74 0.035(10) 0.030(9) 0.012(8) 0.004(7) 0.007(7) -0.020(8) 
C75 0.058(13) 0.027(10) 0.028(10) 0.000(8) 0.014(9) -0.017(10) 
C76 0.032(11) 0.022(9) 0.054(14) 0.003(9) -0.015(10) -0.005(8) 
C77 0.022(9) 0.016(8) 0.044(12) -0.006(8) -0.007(8) -0.005(7) 
C78 0.029(9) 0.014(8) 0.020(8) -0.008(6) 0.009(7) 0.001(7) 
C79 0.030(8) 0.002(6) 0.018(8) -0.001(6) 0.005(6) -0.015(6) 
C80 0.024(9) 0.019(8) 0.025(9) 0.001(7) 0.007(7) -0.002(7) 
C81 0.032(9) 0.033(10) 0.025(10) 0.013(8) -0.005(7) -0.001(8) 
C82 0.045(11) 0.012(8) 0.024(9) 0.005(7) 0.008(8) -0.004(8) 
C83 0.050(13) 0.037(11) 0.022(10) 0.001(8) 0.014(9) 0.003(10) 
C84 0.032(10) 0.012(8) 0.039(10) -0.001(7) 0.015(8) 0.000(7) 
C85 0.015(7) 0.017(8) 0.033(10) 0.009(7) -0.001(7) 0.012(6) 
C86 0.024(10) 0.068(14) 0.018(10) 0.000(9) 0.004(8) 0.007(9) 
C87 0.039(11) 0.044(12) 0.030(11) 0.006(9) 0.000(9) 0.003(10) 
C88 0.040(11) 0.036(11) 0.033(11) -0.012(9) -0.006(9) 0.008(9) 
C89 0.036(10) 0.039(11) 0.028(11) 0.000(9) -0.006(8) 0.011(9) 
C90 0.017(9) 0.046(11) 0.028(10) -0.013(8) 0.005(7) -0.003(8) 
C91 0.022(8) 0.016(8) 0.033(10) -0.002(7) -0.004(7) 0.002(7) 
C92 0.044(12) 0.027(11) 0.068(16) 0.016(10) -0.010(11) -0.011(9) 
C93 0.034(12) 0.042(12) 0.072(17) 0.000(11) -0.002(11) -0.017(10) 
C94 0.035(12) 0.062(18) 0.081(19) 0.029(15) 0.000(12) -0.003(12) 
C95 0.019(9) 0.043(14) 0.071(17) 0.030(12) 0.018(10) 0.006(9) 
C96 0.024(9) 0.025(10) 0.049(12) 0.013(9) 0.008(8) 0.015(8) 
C97 0.027(9) 0.024(8) 0.019(8) -0.007(7) -0.016(7) -0.007(7) 
C98 0.036(11) 0.016(9) 0.063(14) 0.020(9) -0.011(10) 0.001(8) 
C99 0.15(3) 0.005(9) 0.051(16) -0.009(9) -0.048(17) 0.004(12) 
C100 0.17(3) 0.012(11) 0.035(14) -0.027(10) -0.006(17) 0.029(14) 
C101 0.11(2) 0.046(15) 0.045(16) -0.019(13) 0.022(16) 0.010(16) 
C102 0.068(15) 0.024(10) 0.023(10) -0.010(8) 0.009(10) -0.008(10) 
C103 0.026(8) 0.024(8) 0.024(9) -0.009(7) 0.018(7) -0.005(7) 
C104 0.051(13) 0.059(14) 0.037(12) -0.010(10) -0.002(10) -0.036(11) 
C105 0.095(19) 0.056(16) 0.052(15) -0.023(12) -0.005(14) -0.043(14) 
C106 0.094(18) 0.023(11) 0.053(14) -0.002(10) 0.020(13) -0.029(11) 
C107 0.055(13) 0.040(12) 0.041(13) 0.011(10) 0.014(11) 0.003(10) 
C108 0.025(10) 0.057(13) 0.057(13) 0.015(11) 0.016(9) 0.001(9) 
C1S 0.048(11) 0.018(9) 0.031(10) -0.005(8) -0.003(9) 0.002(8) 
C2S 0.043(12) 0.050(13) 0.018(9) 0.001(9) 0.004(8) -0.009(10) 
C3S 0.060(18) 0.039(14) 0.11(2) -0.006(14) 0.012(16) 0.029(13) 
C4S 0.07(2) 0.034(14) 0.12(3) -0.009(16) -0.034(19) 0.002(13) 
Cl1 0.047(3) 0.033(3) 0.055(3) 0.011(2) -0.022(3) -0.002(2) 
Cl2 0.086(5) 0.036(3) 0.044(3) 0.018(3) -0.016(3) -0.010(3) 
Cl3 0.072(4) 0.076(4) 0.043(4) 0.014(3) -0.021(3) -0.034(4) 
Cl4 0.054(3) 0.030(3) 0.061(4) 0.007(2) 0.030(3) 0.004(2) 
Cl5 0.082(5) 0.045(3) 0.048(4) 0.012(3) 0.015(3) 0.009(3) 
Cl6 0.078(5) 0.064(4) 0.048(4) 0.005(3) 0.029(3) 0.017(4) 
Cl7 0.149(8) 0.149(8) 0.043(4) 0.013(5) 0.022(5) 0.090(7) 
Cl8 0.113(7) 0.030(3) 0.214(10) -0.001(5) 0.108(7) -0.002(4) 
Cl9 0.108(6) 0.032(3) 0.148(8) -0.003(4) -0.083(6) 0.006(4) 
Cl10 0.132(7) 0.054(4) 0.047(4) 0.009(3) -0.039(4) -0.024(4) 
 
_geom_special_details 
; 
 All esds (except the esd in the dihedral angle between two l.s. planes) 
 are estimated using the full covariance matrix.  The cell esds are taken 
 into account individually in the estimation of esds in distances, angles 
 and torsion angles; correlations between esds in cell parameters are only 
 used when they are defined by crystal symmetry.  An approximate (isotropic) 
 treatment of cell esds is used for estimating esds involving l.s. planes. 
; 
 
loop_ 
 _geom_bond_atom_site_label_1 
 _geom_bond_atom_site_label_2 
 _geom_bond_distance 
 _geom_bond_site_symmetry_2 
 _geom_bond_publ_flag 
Au1 P5 2.298(6) . ? 
Au1 P3 2.332(6) . ? 
Au1 P1 2.418(5) . ? 
Au1 Tl1 2.844(4) . ? 
Au2 P2 2.372(7) . ? 
Au2 P6 2.319(7) . ? 
Au2 P4 2.310(7) . ? 
Au2 Tl1 2.869(4) . ? 
Pd1 P1 2.210(9) . ? 
Pd1 P5 2.442(10) . ? 
Pd1 P3 2.489(10) . ? 
Pd1 Tl1 2.671(8) . ? 
Pd2 P6 2.333(15) . ? 
Pd2 P2 2.285(15) . ? 
Pd2 P4 2.473(14) . ? 
Pd2 Tl1 2.648(9) . ? 
P1 C43 1.801(18) . ? 
P1 C37 1.820(17) . ? 
P1 C1 1.80(2) . ? 
P2 C55 1.811(18) . ? 
P2 C49 1.836(18) . ? 
P2 C10 1.829(17) . ? 
P3 C67 1.799(18) . ? 
P3 C61 1.838(18) . ? 
P3 C13 1.822(17) . ? 
P4 C79 1.859(17) . ? 
P4 C22 1.862(17) . ? 
P4 C73 1.850(17) . ? 
P5 C91 1.827(18) . ? 
P5 C85 1.825(19) . ? 
P5 C25 1.875(17) . ? 
P6 C103 1.809(18) . ? 
P6 C34 1.869(17) . ? 
P6 C97 1.838(18) . ? 
P7 F6 1.544(18) . ? 
P7 F5 1.581(15) . ? 
P7 F2 1.601(15) . ? 
P7 F3 1.616(16) . ? 
P7 F1 1.580(13) . ? 
P7 F4 1.588(15) . ? 
P8 F12 1.549(18) . ? 
P8 F10 1.581(14) . ? 
P8 F8 1.526(15) . ? 
P8 F9 1.643(17) . ? 
P8 F7 1.607(16) . ? 
P8 F11 1.601(17) . ? 
N1 C1 1.29(2) . ? 
N1 C5 1.31(2) . ? 
N2 C10 1.34(2) . ? 
N2 C6 1.41(2) . ? 
N3 C13 1.34(2) . ? 
N3 C17 1.36(2) . ? 
N4 C22 1.34(2) . ? 
N4 C18 1.37(2) . ? 
N5 C25 1.30(2) . ? 
N5 C29 1.35(2) . ? 
N6 C34 1.36(2) . ? 
N6 C30 1.40(2) . ? 
C1 C2 1.44(2) . ? 
C2 C3 1.36(3) . ? 
C3 C4 1.45(3) . ? 
C4 C11 1.43(3) . ? 
C4 C5 1.42(2) . ? 
C5 C6 1.43(2) . ? 
C6 C7 1.42(3) . ? 
C7 C8 1.39(3) . ? 
C7 C12 1.43(2) . ? 
C8 C9 1.40(2) . ? 
C9 C10 1.40(2) . ? 
C11 C12 1.36(3) . ? 
C13 C14 1.43(2) . ? 
C14 C15 1.36(3) . ? 
C15 C16 1.42(3) . ? 
C16 C17 1.41(3) . ? 
C16 C23 1.43(3) . ? 
C17 C18 1.44(2) . ? 
C18 C19 1.44(3) . ? 
C19 C20 1.35(3) . ? 
C19 C24 1.46(3) . ? 
C20 C21 1.34(3) . ? 
C21 C22 1.38(3) . ? 
C23 C24 1.32(3) . ? 
C25 C26 1.44(3) . ? 
C26 C27 1.34(3) . ? 
C27 C28 1.39(2) . ? 
C28 C29 1.43(2) . ? 
C28 C35 1.43(3) . ? 
C29 C30 1.45(2) . ? 
C30 C31 1.41(2) . ? 
C31 C32 1.39(3) . ? 
C31 C36 1.44(2) . ? 
C32 C33 1.34(3) . ? 
C33 C34 1.37(2) . ? 
C35 C36 1.34(3) . ? 
C37 C42 1.42(3) . ? 
C37 C38 1.41(3) . ? 
C38 C39 1.38(3) . ? 
C39 C40 1.29(4) . ? 
C40 C41 1.32(4) . ? 
C41 C42 1.41(3) . ? 
C43 C48 1.35(3) . ? 
C43 C44 1.44(3) . ? 
C44 C45 1.37(3) . ? 
C45 C46 1.48(5) . ? 
C46 C47 1.43(6) . ? 
C47 C48 1.42(4) . ? 
C49 C50 1.38(3) . ? 
C49 C54 1.38(3) . ? 
C50 C51 1.39(2) . ? 
C51 C52 1.41(3) . ? 
C52 C53 1.34(3) . ? 
C53 C54 1.43(3) . ? 
C55 C56 1.37(3) . ? 
C55 C60 1.39(3) . ? 
C56 C57 1.39(3) . ? 
C57 C58 1.42(4) . ? 
C58 C59 1.40(4) . ? 
C59 C60 1.37(3) . ? 
C61 C66 1.33(3) . ? 
C61 C62 1.42(2) . ? 
C62 C63 1.36(3) . ? 
C63 C64 1.37(3) . ? 
C64 C65 1.41(4) . ? 
C65 C66 1.43(3) . ? 
C67 C68 1.38(3) . ? 
C67 C72 1.44(2) . ? 
C68 C69 1.39(3) . ? 
C69 C70 1.38(3) . ? 
C70 C71 1.42(3) . ? 
C71 C72 1.40(3) . ? 
C73 C74 1.39(2) . ? 
C73 C78 1.40(2) . ? 
C74 C75 1.39(3) . ? 
C75 C76 1.38(3) . ? 
C76 C77 1.41(3) . ? 
C77 C78 1.40(2) . ? 
C79 C84 1.38(2) . ? 
C79 C80 1.38(3) . ? 
C80 C81 1.39(3) . ? 
C81 C82 1.38(3) . ? 
C82 C83 1.39(3) . ? 
C83 C84 1.38(3) . ? 
C85 C86 1.42(3) . ? 
C85 C90 1.38(3) . ? 
C86 C87 1.35(3) . ? 
C87 C88 1.40(3) . ? 
C88 C89 1.39(3) . ? 
C89 C90 1.39(3) . ? 
C91 C92 1.38(3) . ? 
C91 C96 1.39(2) . ? 
C92 C93 1.40(3) . ? 
C93 C94 1.40(4) . ? 
C94 C95 1.35(4) . ? 
C95 C96 1.36(3) . ? 
C97 C102 1.36(3) . ? 
C97 C98 1.37(3) . ? 
C98 C99 1.38(3) . ? 
C99 C100 1.36(5) . ? 
C100 C101 1.39(5) . ? 
C101 C102 1.40(3) . ? 
C103 C104 1.35(3) . ? 
C103 C108 1.42(3) . ? 
C104 C105 1.43(3) . ? 
C105 C106 1.37(4) . ? 
C106 C107 1.35(4) . ? 
C107 C108 1.37(3) . ? 
C1S Cl2 1.73(2) . ? 
C1S Cl3 1.73(2) . ? 
C1S Cl1 1.76(2) . ? 
C2S Cl5 1.74(2) . ? 
C2S Cl6 1.76(2) . ? 
C2S Cl4 1.77(2) . ? 
C3S Cl7 1.67(3) . ? 
C3S Cl8 1.75(3) . ? 
C4S Cl9 1.73(3) . ? 
C4S Cl10 1.87(4) . ? 
 
loop_ 
 _geom_angle_atom_site_label_1 
 _geom_angle_atom_site_label_2 
 _geom_angle_atom_site_label_3 
 _geom_angle 
 _geom_angle_site_symmetry_1 
 _geom_angle_site_symmetry_3 
 _geom_angle_publ_flag 
P5 Au1 P3 117.4(2) . . ? 
P5 Au1 P1 125.0(3) . . ? 
P3 Au1 P1 115.4(2) . . ? 
P5 Au1 Tl1 98.11(19) . . ? 
P3 Au1 Tl1 92.57(18) . . ? 
P1 Au1 Tl1 93.91(14) . . ? 
P2 Au2 P6 122.1(3) . . ? 
P2 Au2 P4 114.2(3) . . ? 
P6 Au2 P4 122.2(3) . . ? 
P2 Au2 Tl1 94.06(17) . . ? 
P6 Au2 Tl1 94.16(19) . . ? 
P4 Au2 Tl1 94.2(2) . . ? 
P1 Pd1 P5 128.1(5) . . ? 
P1 Pd1 P3 117.3(5) . . ? 
P5 Pd1 P3 106.7(3) . . ? 
P1 Pd1 Tl1 104.0(3) . . ? 
P5 Pd1 Tl1 99.3(3) . . ? 
P3 Pd1 Tl1 93.4(3) . . ? 
P6 Pd2 P2 125.4(6) . . ? 
P6 Pd2 P4 114.9(5) . . ? 
P2 Pd2 P4 111.4(6) . . ? 
P6 Pd2 Tl1 99.9(5) . . ? 
P2 Pd2 Tl1 102.4(4) . . ? 
P4 Pd2 Tl1 96.1(4) . . ? 
Pd2 Tl1 Pd1 168.4(4) . . ? 
Pd2 Tl1 Au1 173.4(3) . . ? 
Pd1 Tl1 Au1 5.0(2) . . ? 
Pd2 Tl1 Au2 3.3(4) . . ? 
Pd1 Tl1 Au2 168.9(2) . . ? 
Au1 Tl1 Au2 173.62(15) . . ? 
C43 P1 C37 104.1(8) . . ? 
C43 P1 C1 102.6(9) . . ? 
C37 P1 C1 104.1(7) . . ? 
C43 P1 Pd1 123.1(7) . . ? 
C37 P1 Pd1 111.0(6) . . ? 
C1 P1 Pd1 110.1(6) . . ? 
C43 P1 Au1 126.4(7) . . ? 
C37 P1 Au1 105.8(6) . . ? 
C1 P1 Au1 111.8(6) . . ? 
Pd1 P1 Au1 5.3(3) . . ? 
C55 P2 C49 103.2(9) . . ? 
C55 P2 C10 104.2(8) . . ? 
C49 P2 C10 101.0(8) . . ? 
C55 P2 Au2 120.6(6) . . ? 
C49 P2 Au2 108.8(6) . . ? 
C10 P2 Au2 116.6(6) . . ? 
C55 P2 Pd2 121.3(7) . . ? 
C49 P2 Pd2 113.8(6) . . ? 
C10 P2 Pd2 111.0(6) . . ? 
Au2 P2 Pd2 6.3(3) . . ? 
C67 P3 C61 103.4(8) . . ? 
C67 P3 C13 100.4(8) . . ? 
C61 P3 C13 105.0(8) . . ? 
C67 P3 Au1 128.9(6) . . ? 
C61 P3 Au1 107.2(6) . . ? 
C13 P3 Au1 109.6(6) . . ? 
C67 P3 Pd1 123.1(6) . . ? 
C61 P3 Pd1 111.6(6) . . ? 
C13 P3 Pd1 111.4(6) . . ? 
Au1 P3 Pd1 6.0(2) . . ? 
C79 P4 C22 102.0(8) . . ? 
C79 P4 C73 101.6(7) . . ? 
C22 P4 C73 104.8(8) . . ? 
C79 P4 Au2 127.1(5) . . ? 
C22 P4 Au2 111.7(6) . . ? 
C73 P4 Au2 107.4(6) . . ? 
C79 P4 Pd2 126.2(6) . . ? 
C22 P4 Pd2 107.9(6) . . ? 
C73 P4 Pd2 112.2(6) . . ? 
Au2 P4 Pd2 5.2(3) . . ? 
C91 P5 C85 104.3(8) . . ? 
C91 P5 C25 104.0(8) . . ? 
C85 P5 C25 104.9(8) . . ? 
C91 P5 Au1 117.5(6) . . ? 
C85 P5 Au1 109.9(6) . . ? 
C25 P5 Au1 115.0(6) . . ? 
C91 P5 Pd1 121.0(7) . . ? 
C85 P5 Pd1 112.5(6) . . ? 
C25 P5 Pd1 108.7(6) . . ? 
Au1 P5 Pd1 6.3(2) . . ? 
C103 P6 C34 105.6(8) . . ? 
C103 P6 C97 105.1(8) . . ? 
C34 P6 C97 101.4(8) . . ? 
C103 P6 Au2 125.0(7) . . ? 
C34 P6 Au2 110.0(5) . . ? 
C97 P6 Au2 107.3(6) . . ? 
C103 P6 Pd2 119.0(7) . . ? 
C34 P6 Pd2 111.1(6) . . ? 
C97 P6 Pd2 113.0(6) . . ? 
Au2 P6 Pd2 6.7(3) . . ? 
F6 P7 F5 89.9(13) . . ? 
F6 P7 F2 92.5(12) . . ? 
F5 P7 F2 177.4(13) . . ? 
F6 P7 F3 177.7(11) . . ? 
F5 P7 F3 90.9(13) . . ? 
F2 P7 F3 86.6(12) . . ? 
F6 P7 F1 93.3(10) . . ? 
F5 P7 F1 89.7(9) . . ? 
F2 P7 F1 91.0(8) . . ? 
F3 P7 F1 88.8(9) . . ? 
F6 P7 F4 87.9(11) . . ? 
F5 P7 F4 92.4(9) . . ? 
F2 P7 F4 86.9(9) . . ? 
F3 P7 F4 90.0(9) . . ? 
F1 P7 F4 177.6(8) . . ? 
F12 P8 F10 89.7(12) . . ? 
F12 P8 F8 92.8(12) . . ? 
F10 P8 F8 90.7(8) . . ? 
F12 P8 F9 174.0(11) . . ? 
F10 P8 F9 95.2(11) . . ? 
F8 P8 F9 90.6(10) . . ? 
F12 P8 F7 92.3(12) . . ? 
F10 P8 F7 177.7(11) . . ? 
F8 P8 F7 90.3(8) . . ? 
F9 P8 F7 82.7(11) . . ? 
F12 P8 F11 88.7(12) . . ? 
F10 P8 F11 90.4(8) . . ? 
F8 P8 F11 178.2(10) . . ? 
F9 P8 F11 87.8(10) . . ? 
F7 P8 F11 88.6(8) . . ? 
C1 N1 C5 124.5(16) . . ? 
C10 N2 C6 118.0(14) . . ? 
C13 N3 C17 118.6(15) . . ? 
C22 N4 C18 116.7(14) . . ? 
C25 N5 C29 116.9(16) . . ? 
C34 N6 C30 113.4(13) . . ? 
N1 C1 C2 119.4(18) . . ? 
N1 C1 P1 117.9(13) . . ? 
C2 C1 P1 121.9(13) . . ? 
C3 C2 C1 119.0(16) . . ? 
C2 C3 C4 119.7(15) . . ? 
C3 C4 C11 119.7(16) . . ? 
C3 C4 C5 116.0(16) . . ? 
C11 C4 C5 124.2(17) . . ? 
N1 C5 C4 120.9(16) . . ? 
N1 C5 C6 122.7(15) . . ? 
C4 C5 C6 116.2(16) . . ? 
N2 C6 C7 120.2(16) . . ? 
N2 C6 C5 118.4(15) . . ? 
C7 C6 C5 120.9(15) . . ? 
C8 C7 C6 120.1(16) . . ? 
C8 C7 C12 121.3(18) . . ? 
C6 C7 C12 118.6(17) . . ? 
C9 C8 C7 117.8(16) . . ? 
C8 C9 C10 120.2(16) . . ? 
N2 C10 C9 123.2(15) . . ? 
N2 C10 P2 114.9(12) . . ? 
C9 C10 P2 121.8(13) . . ? 
C12 C11 C4 116.9(16) . . ? 
C11 C12 C7 123.0(18) . . ? 
N3 C13 C14 122.4(15) . . ? 
N3 C13 P3 116.8(12) . . ? 
C14 C13 P3 120.8(13) . . ? 
C15 C14 C13 118.7(16) . . ? 
C14 C15 C16 120.0(17) . . ? 
C15 C16 C17 117.6(18) . . ? 
C15 C16 C23 122.5(19) . . ? 
C17 C16 C23 119.7(19) . . ? 
N3 C17 C16 122.4(17) . . ? 
N3 C17 C18 119.1(16) . . ? 
C16 C17 C18 118.3(16) . . ? 
N4 C18 C19 119.6(16) . . ? 
N4 C18 C17 119.8(15) . . ? 
C19 C18 C17 120.6(17) . . ? 
C20 C19 C18 120.4(19) . . ? 
C20 C19 C24 121.8(19) . . ? 
C18 C19 C24 117.5(19) . . ? 
C21 C20 C19 119.2(19) . . ? 
C20 C21 C22 119.8(18) . . ? 
N4 C22 C21 124.1(16) . . ? 
N4 C22 P4 112.6(12) . . ? 
C21 C22 P4 123.3(14) . . ? 
C24 C23 C16 123(2) . . ? 
C23 C24 C19 120(2) . . ? 
N5 C25 C26 125.1(16) . . ? 
N5 C25 P5 116.1(15) . . ? 
C26 C25 P5 118.5(13) . . ? 
C27 C26 C25 117.5(16) . . ? 
C26 C27 C28 119.9(18) . . ? 
C27 C28 C29 118.4(17) . . ? 
C27 C28 C35 121.8(17) . . ? 
C29 C28 C35 119.8(16) . . ? 
N5 C29 C28 121.9(17) . . ? 
N5 C29 C30 119.1(15) . . ? 
C28 C29 C30 118.9(15) . . ? 
N6 C30 C31 122.8(15) . . ? 
N6 C30 C29 116.7(14) . . ? 
C31 C30 C29 120.4(15) . . ? 
C30 C31 C32 118.1(16) . . ? 
C30 C31 C36 116.7(15) . . ? 
C32 C31 C36 125.1(16) . . ? 
C33 C32 C31 120.1(16) . . ? 
C32 C33 C34 119.1(18) . . ? 
N6 C34 C33 125.5(16) . . ? 
N6 C34 P6 110.7(11) . . ? 
C33 C34 P6 123.8(13) . . ? 
C36 C35 C28 118.9(17) . . ? 
C35 C36 C31 124.9(16) . . ? 
C42 C37 C38 118.4(18) . . ? 
C42 C37 P1 123.0(13) . . ? 
C38 C37 P1 118.2(15) . . ? 
C37 C38 C39 121(2) . . ? 
C40 C39 C38 120(2) . . ? 
C39 C40 C41 123(2) . . ? 
C40 C41 C42 123(3) . . ? 
C37 C42 C41 115(2) . . ? 
C48 C43 C44 120(2) . . ? 
C48 C43 P1 119.4(18) . . ? 
C44 C43 P1 120.3(17) . . ? 
C45 C44 C43 122(3) . . ? 
C46 C45 C44 113(3) . . ? 
C47 C46 C45 125(2) . . ? 
C46 C47 C48 113(3) . . ? 
C43 C48 C47 124(3) . . ? 
C50 C49 C54 119.2(16) . . ? 
C50 C49 P2 118.1(13) . . ? 
C54 C49 P2 122.7(14) . . ? 
C49 C50 C51 121.6(16) . . ? 
C52 C51 C50 119.1(17) . . ? 
C53 C52 C51 119.6(18) . . ? 
C52 C53 C54 121.2(18) . . ? 
C49 C54 C53 119.2(17) . . ? 
C56 C55 C60 117.8(17) . . ? 
C56 C55 P2 120.8(14) . . ? 
C60 C55 P2 121.3(15) . . ? 
C55 C56 C57 124(2) . . ? 
C58 C57 C56 116(2) . . ? 
C57 C58 C59 120(2) . . ? 
C58 C59 C60 119(2) . . ? 
C59 C60 C55 121(2) . . ? 
C66 C61 C62 120.0(17) . . ? 
C66 C61 P3 116.2(13) . . ? 
C62 C61 P3 123.7(15) . . ? 
C63 C62 C61 118.8(18) . . ? 
C62 C63 C64 122.3(19) . . ? 
C65 C64 C63 119(2) . . ? 
C64 C65 C66 117(2) . . ? 
C65 C66 C61 122(2) . . ? 
C68 C67 C72 117.2(16) . . ? 
C68 C67 P3 124.9(13) . . ? 
C72 C67 P3 117.8(13) . . ? 
C69 C68 C67 122.1(19) . . ? 
C68 C69 C70 121(2) . . ? 
C71 C70 C69 120.3(18) . . ? 
C70 C71 C72 117.9(18) . . ? 
C71 C72 C67 121.8(17) . . ? 
C74 C73 C78 120.2(15) . . ? 
C74 C73 P4 116.7(13) . . ? 
C78 C73 P4 123.1(13) . . ? 
C73 C74 C75 120.0(16) . . ? 
C74 C75 C76 121(2) . . ? 
C77 C76 C75 119.0(19) . . ? 
C76 C77 C78 120.5(18) . . ? 
C77 C78 C73 119.0(16) . . ? 
C84 C79 C80 119.3(16) . . ? 
C84 C79 P4 121.7(14) . . ? 
C80 C79 P4 119.0(13) . . ? 
C81 C80 C79 119.5(17) . . ? 
C80 C81 C82 121.4(18) . . ? 
C83 C82 C81 118.4(18) . . ? 
C82 C83 C84 120.2(18) . . ? 
C83 C84 C79 120.9(18) . . ? 
C86 C85 C90 118.7(18) . . ? 
C86 C85 P5 122.4(15) . . ? 
C90 C85 P5 118.7(14) . . ? 
C87 C86 C85 120(2) . . ? 
C88 C87 C86 121(2) . . ? 
C87 C88 C89 119(2) . . ? 
C90 C89 C88 119(2) . . ? 
C89 C90 C85 121.1(18) . . ? 
C92 C91 C96 117.9(19) . . ? 
C92 C91 P5 120.7(15) . . ? 
C96 C91 P5 120.8(15) . . ? 
C91 C92 C93 120(2) . . ? 
C94 C93 C92 118(2) . . ? 
C93 C94 C95 122(2) . . ? 
C96 C95 C94 119(2) . . ? 
C95 C96 C91 122(2) . . ? 
C102 C97 C98 120.3(19) . . ? 
C102 C97 P6 122.5(15) . . ? 
C98 C97 P6 117.0(16) . . ? 
C99 C98 C97 120(2) . . ? 
C98 C99 C100 121(3) . . ? 
C101 C100 C99 119(2) . . ? 
C100 C101 C102 120(3) . . ? 
C97 C102 C101 120(2) . . ? 
C104 C103 C108 116.6(19) . . ? 
C104 C103 P6 125.9(16) . . ? 
C108 C103 P6 117.5(15) . . ? 
C103 C104 C105 120(2) . . ? 
C106 C105 C104 120(2) . . ? 
C107 C106 C105 120(2) . . ? 
C106 C107 C108 120(2) . . ? 
C107 C108 C103 123(2) . . ? 
Cl2 C1S Cl3 112.1(11) . . ? 
Cl2 C1S Cl1 113.0(12) . . ? 
Cl3 C1S Cl1 111.0(12) . . ? 
Cl5 C2S Cl6 110.5(13) . . ? 
Cl5 C2S Cl4 111.1(12) . . ? 
Cl6 C2S Cl4 111.2(12) . . ? 
Cl7 C3S Cl8 112.8(18) . . ? 
Cl9 C4S Cl10 108(2) . . ? 
 
_diffrn_measured_fraction_theta_max    0.999 
_diffrn_reflns_theta_full              27.50 
_diffrn_measured_fraction_theta_full   0.999 
_refine_diff_density_max    6.068 
_refine_diff_density_min   -8.220 
_refine_diff_density_rms    0.411 

#===END
  
data_371abs 
  
_audit_creation_method            SHELXL-97 
_chemical_name_systematic 
; 
 ? 
; 
_chemical_name_common             1�(BF4)2�2.5CH2Cl2 
_chemical_melting_point           ? 
_chemical_formula_moiety          ? 
_chemical_formula_sum 
 'C110.50 H84 Au B2 Cl5 F8 N6 P6 Pd Tl' 
_chemical_formula_weight          2540.26 
  
loop_ 
 _atom_type_symbol 
 _atom_type_description 
 _atom_type_scat_dispersion_real 
 _atom_type_scat_dispersion_imag 
 _atom_type_scat_source 
 'C'  'C'   0.0033   0.0016 
 'International Tables Vol C Tables 4.2.6.8 and 6.1.1.4' 
 'H'  'H'   0.0000   0.0000 
 'International Tables Vol C Tables 4.2.6.8 and 6.1.1.4' 
 'B'  'B'   0.0013   0.0007 
 'International Tables Vol C Tables 4.2.6.8 and 6.1.1.4' 
 'N'  'N'   0.0061   0.0033 
 'International Tables Vol C Tables 4.2.6.8 and 6.1.1.4' 
 'F'  'F'   0.0171   0.0103 
 'International Tables Vol C Tables 4.2.6.8 and 6.1.1.4' 
 'P'  'P'   0.1023   0.0942 
 'International Tables Vol C Tables 4.2.6.8 and 6.1.1.4' 
 'Cl'  'Cl'   0.1484   0.1585 
 'International Tables Vol C Tables 4.2.6.8 and 6.1.1.4' 
 'Pd'  'Pd'  -0.9988   1.0072 
 'International Tables Vol C Tables 4.2.6.8 and 6.1.1.4' 
 'Au'  'Au'  -2.0133   8.8022 
 'International Tables Vol C Tables 4.2.6.8 and 6.1.1.4' 
 'Tl'  'Tl'  -2.8358   9.6688 
 'International Tables Vol C Tables 4.2.6.8 and 6.1.1.4' 
  
_symmetry_cell_setting            Monoclinic 
_symmetry_space_group_name_H-M    P2(1)/n 
  
loop_ 
 _symmetry_equiv_pos_as_xyz 
 'x, y, z' 
 '-x+1/2, y+1/2, -z+1/2' 
 '-x, -y, -z' 
 'x-1/2, -y-1/2, z-1/2' 
  
_cell_length_a                    17.5229(13) 
_cell_length_b                    29.432(2) 
_cell_length_c                    19.2201(14) 
_cell_angle_alpha                 90.00 
_cell_angle_beta                  92.4790(10) 
_cell_angle_gamma                 90.00 
_cell_volume                      9903.2(13) 
_cell_formula_units_Z             4 
_cell_measurement_temperature     123(2) 
_cell_measurement_reflns_used     ? 
_cell_measurement_theta_min       ? 
_cell_measurement_theta_max       ? 
  
_exptl_crystal_description        plate 
_exptl_crystal_colour             red 
_exptl_crystal_size_max           0.25 
_exptl_crystal_size_mid           0.24 
_exptl_crystal_size_min           0.05 
_exptl_crystal_density_meas       0 
_exptl_crystal_density_diffrn     1.704 
_exptl_crystal_density_method     'not measured' 
_exptl_crystal_F_000              5008 
_exptl_absorpt_coefficient_mu     3.582 
_exptl_absorpt_correction_type    none 
_exptl_absorpt_correction_T_min   0.4679 
_exptl_absorpt_correction_T_max   0.8554 
_exptl_absorpt_process_details    ? 
  
_exptl_special_details 
; 
 ? 
; 
  
_diffrn_ambient_temperature       123(2) 
_diffrn_radiation_wavelength      0.71073 
_diffrn_radiation_type            MoK\a 
_diffrn_radiation_source          'fine-focus sealed tube' 
_diffrn_radiation_monochromator   graphite 
_diffrn_measurement_device_type   'CCD area detector' 
_diffrn_measurement_method        'phi and omega scans' 
_diffrn_detector_area_resol_mean  ? 
_diffrn_standards_number          ? 
_diffrn_standards_interval_count  ? 
_diffrn_standards_interval_time   ? 
_diffrn_standards_decay_%         ? 
_diffrn_reflns_number             109176 
_diffrn_reflns_av_R_equivalents   0.0772 
_diffrn_reflns_av_sigmaI/netI     0.0673 
_diffrn_reflns_limit_h_min        -22 
_diffrn_reflns_limit_h_max        22 
_diffrn_reflns_limit_k_min        -38 
_diffrn_reflns_limit_k_max        38 
_diffrn_reflns_limit_l_min        -24 
_diffrn_reflns_limit_l_max        24 
_diffrn_reflns_theta_min          1.27 
_diffrn_reflns_theta_max          27.48 
_reflns_number_total              22688 
_reflns_number_gt                 16212 
_reflns_threshold_expression      >2sigma(I) 
  
_computing_data_collection        'Bruker SMART' 
_computing_cell_refinement        'Bruker SMART' 
_computing_data_reduction         'Bruker SAINT' 
_computing_structure_solution     'SHELXS-97 (Sheldrick, 1990)' 
_computing_structure_refinement   'SHELXL-97 (Sheldrick, 1997)' 
_computing_molecular_graphics     'Bruker SHELXTL' 
_computing_publication_material   'Bruker SHELXTL' 
  
_refine_special_details 
; 
 Refinement of F^2^ against ALL reflections.  The weighted R-factor wR and 
 goodness of fit S are based on F^2^, conventional R-factors R are based 
 on F, with F set to zero for negative F^2^. The threshold expression of 
 F^2^ > 2sigma(F^2^) is used only for calculating R-factors(gt) etc. and is 
 not relevant to the choice of reflections for refinement.  R-factors based 
 on F^2^ are statistically about twice as large as those based on F, and R- 
 factors based on ALL data will be even larger. 
; 
  
_refine_ls_structure_factor_coef  Fsqd 
_refine_ls_matrix_type            full 
_refine_ls_weighting_scheme       calc 
_refine_ls_weighting_details 
 'calc w=1/[\s^2^(Fo^2^)+(0.0784P)^2^+0.0000P] where P=(Fo^2^+2Fc^2^)/3' 
_atom_sites_solution_primary      direct 
_atom_sites_solution_secondary    difmap 
_atom_sites_solution_hydrogens    geom 
_refine_ls_hydrogen_treatment     mixed 
_refine_ls_extinction_method      none 
_refine_ls_extinction_coef        ? 
_refine_ls_number_reflns          22688 
_refine_ls_number_parameters      1298 
_refine_ls_number_restraints      12 
_refine_ls_R_factor_all           0.0887 
_refine_ls_R_factor_gt            0.0555 
_refine_ls_wR_factor_ref          0.1583 
_refine_ls_wR_factor_gt           0.1421 
_refine_ls_goodness_of_fit_ref    1.179 
_refine_ls_restrained_S_all       1.179 
_refine_ls_shift/su_max           0.001 
_refine_ls_shift/su_mean          0.000 
  
loop_ 
 _atom_site_label 
 _atom_site_type_symbol 
 _atom_site_fract_x 
 _atom_site_fract_y 
 _atom_site_fract_z 
 _atom_site_U_iso_or_equiv 
 _atom_site_adp_type 
 _atom_site_occupancy 
 _atom_site_symmetry_multiplicity 
 _atom_site_calc_flag 
 _atom_site_refinement_flags 
 _atom_site_disorder_assembly 
 _atom_site_disorder_group 
Au1 Au 0.9159(5) 0.1665(2) 0.6462(3) 0.0204(3) Uani 0.4937(15) 1 d PD . . 
Pd1 Pd 0.9243(8) 0.3210(5) 0.4812(7) 0.0197(4) Uani 0.4937(15) 1 d PD . . 
Pd2 Pd 0.9155(10) 0.1653(4) 0.6418(7) 0.0204(3) Uani 0.5063(15) 1 d PD . . 
Au2 Au 0.9310(4) 0.3211(2) 0.4809(4) 0.0197(4) Uani 0.5063(15) 1 d PD . . 
Tl1 Tl 0.90570(2) 0.243734(13) 0.561861(17) 0.05496(11) Uani 1 1 d D . . 
P1 P 0.86975(9) 0.20073(5) 0.74364(7) 0.0197(3) Uani 1 1 d . . . 
P2 P 1.05851(9) 0.33479(5) 0.50563(7) 0.0204(3) Uani 1 1 d . . . 
P3 P 0.82200(9) 0.12392(5) 0.57914(8) 0.0234(3) Uani 1 1 d . . . 
P4 P 0.83901(9) 0.36447(5) 0.54215(8) 0.0219(3) Uani 1 1 d . . . 
P5 P 1.04260(9) 0.14702(5) 0.62561(8) 0.0219(3) Uani 1 1 d . . . 
P6 P 0.87681(9) 0.29206(5) 0.37596(8) 0.0235(3) Uani 1 1 d . . . 
N1 N 0.9539(3) 0.27634(15) 0.7326(2) 0.0183(10) Uani 1 1 d . . . 
N2 N 1.0335(3) 0.32782(16) 0.6398(2) 0.0208(10) Uani 1 1 d . . . 
N3 N 0.7352(3) 0.19875(17) 0.5639(2) 0.0231(11) Uani 1 1 d . . . 
N4 N 0.7420(3) 0.29312(16) 0.5512(2) 0.0226(11) Uani 1 1 d . . . 
N5 N 1.0171(3) 0.15448(18) 0.4894(2) 0.0247(11) Uani 1 1 d . . . 
N6 N 0.9474(3) 0.21155(17) 0.3921(2) 0.0241(11) Uani 1 1 d . . . 
C1 C 0.9161(3) 0.2532(2) 0.7783(3) 0.0225(12) Uani 1 1 d . . . 
C2 C 0.9111(3) 0.26525(19) 0.8481(3) 0.0221(12) Uani 1 1 d . . . 
H2A H 0.8818 0.2473 0.8782 0.027 Uiso 1 1 calc R . . 
C3 C 0.9486(4) 0.3028(2) 0.8729(3) 0.0249(13) Uani 1 1 d . . . 
H3A H 0.9443 0.3122 0.9198 0.030 Uiso 1 1 calc R . . 
C4 C 0.9939(4) 0.32727(19) 0.8268(3) 0.0242(13) Uani 1 1 d . . . 
C5 C 0.9941(3) 0.31363(19) 0.7569(3) 0.0204(12) Uani 1 1 d . . . 
C6 C 1.0402(3) 0.33786(19) 0.7087(3) 0.0202(12) Uani 1 1 d . . . 
C7 C 1.0897(4) 0.3723(2) 0.7353(3) 0.0238(13) Uani 1 1 d . . . 
C8 C 1.1375(4) 0.3938(2) 0.6895(3) 0.0298(14) Uani 1 1 d . . . 
H8A H 1.1738 0.4155 0.7065 0.036 Uiso 1 1 calc R . . 
C9 C 1.1318(4) 0.3833(2) 0.6188(3) 0.0275(14) Uani 1 1 d . . . 
H9A H 1.1631 0.3979 0.5864 0.033 Uiso 1 1 calc R . . 
C10 C 1.0776(3) 0.3501(2) 0.5969(3) 0.0226(12) Uani 1 1 d . . . 
C11 C 1.0411(4) 0.3645(2) 0.8504(3) 0.0270(14) Uani 1 1 d . . . 
H11A H 1.0389 0.3748 0.8971 0.032 Uiso 1 1 calc R . . 
C12 C 1.0884(4) 0.3846(2) 0.8068(3) 0.0297(14) Uani 1 1 d . . . 
H12A H 1.1218 0.4078 0.8241 0.036 Uiso 1 1 calc R . . 
C13 C 0.7301(4) 0.1535(2) 0.5694(3) 0.0251(13) Uani 1 1 d . . . 
C14 C 0.6598(4) 0.1303(2) 0.5665(3) 0.0293(14) Uani 1 1 d . . . 
H14A H 0.6585 0.0981 0.5684 0.035 Uiso 1 1 calc R . . 
C15 C 0.5945(4) 0.1542(2) 0.5612(3) 0.0291(14) Uani 1 1 d . . . 
H15A H 0.5467 0.1389 0.5593 0.035 Uiso 1 1 calc R . . 
C16 C 0.5970(4) 0.2021(2) 0.5585(3) 0.0244(13) Uani 1 1 d . . . 
C17 C 0.6698(4) 0.2232(2) 0.5587(3) 0.0252(13) Uani 1 1 d . . . 
C18 C 0.6727(4) 0.2722(2) 0.5534(3) 0.0225(12) Uani 1 1 d . . . 
C19 C 0.6042(4) 0.2971(2) 0.5524(3) 0.0268(13) Uani 1 1 d . . . 
C20 C 0.6074(4) 0.3445(2) 0.5467(3) 0.0339(15) Uani 1 1 d . . . 
H20A H 0.5620 0.3621 0.5460 0.041 Uiso 1 1 calc R . . 
C21 C 0.6776(4) 0.3650(2) 0.5423(3) 0.0317(15) Uani 1 1 d . . . 
H21A H 0.6812 0.3970 0.5378 0.038 Uiso 1 1 calc R . . 
C22 C 0.7430(4) 0.3384(2) 0.5444(3) 0.0242(13) Uani 1 1 d . . . 
C23 C 0.5284(4) 0.2288(2) 0.5560(3) 0.0301(14) Uani 1 1 d . . . 
H23A H 0.4803 0.2140 0.5557 0.036 Uiso 1 1 calc R . . 
C24 C 0.5312(4) 0.2745(2) 0.5540(3) 0.0303(14) Uani 1 1 d . . . 
H24A H 0.4853 0.2918 0.5536 0.036 Uiso 1 1 calc R . . 
C25 C 1.0537(3) 0.1273(2) 0.5362(3) 0.0255(13) Uani 1 1 d . . . 
C26 C 1.0975(4) 0.0901(2) 0.5177(3) 0.0328(15) Uani 1 1 d . . . 
H26A H 1.1239 0.0725 0.5526 0.039 Uiso 1 1 calc R . . 
C27 C 1.1022(4) 0.0792(2) 0.4490(3) 0.0356(16) Uani 1 1 d . . . 
H27A H 1.1317 0.0539 0.4356 0.043 Uiso 1 1 calc R . . 
C28 C 1.0629(4) 0.1059(2) 0.3980(3) 0.0315(15) Uani 1 1 d . . . 
C29 C 1.0221(3) 0.1440(2) 0.4213(3) 0.0239(13) Uani 1 1 d . . . 
C30 C 0.9825(4) 0.1724(2) 0.3707(3) 0.0241(13) Uani 1 1 d . . . 
C31 C 0.9845(4) 0.1612(2) 0.2979(3) 0.0275(14) Uani 1 1 d . . . 
C32 C 0.9459(4) 0.1890(2) 0.2504(3) 0.0299(14) Uani 1 1 d . . . 
H32A H 0.9434 0.1813 0.2023 0.036 Uiso 1 1 calc R . . 
C33 C 0.9116(4) 0.2274(2) 0.2727(3) 0.0309(15) Uani 1 1 d . . . 
H33A H 0.8852 0.2468 0.2404 0.037 Uiso 1 1 calc R . . 
C34 C 0.9154(4) 0.2382(2) 0.3430(3) 0.0250(13) Uani 1 1 d . . . 
C35 C 1.0652(4) 0.0961(2) 0.3254(3) 0.0337(16) Uani 1 1 d . . . 
H35A H 1.0945 0.0710 0.3103 0.040 Uiso 1 1 calc R . . 
C36 C 1.0261(4) 0.1220(2) 0.2779(3) 0.0325(15) Uani 1 1 d . . . 
H36A H 1.0264 0.1139 0.2301 0.039 Uiso 1 1 calc R . . 
C37 C 0.8853(3) 0.16142(18) 0.8163(3) 0.0204(12) Uani 1 1 d . . . 
C38 C 0.9550(4) 0.1386(2) 0.8215(3) 0.0269(13) Uani 1 1 d . . . 
H38A H 0.9918 0.1437 0.7874 0.032 Uiso 1 1 calc R . . 
C39 C 0.9715(4) 0.1084(2) 0.8760(3) 0.0299(14) Uani 1 1 d . . . 
H39A H 1.0191 0.0929 0.8789 0.036 Uiso 1 1 calc R . . 
C40 C 0.9180(4) 0.1012(2) 0.9258(3) 0.0323(15) Uani 1 1 d . . . 
H40A H 0.9290 0.0809 0.9634 0.039 Uiso 1 1 calc R . . 
C41 C 0.8487(4) 0.1234(2) 0.9207(3) 0.0358(16) Uani 1 1 d . . . 
H41A H 0.8116 0.1180 0.9543 0.043 Uiso 1 1 calc R . . 
C42 C 0.8328(4) 0.1538(2) 0.8666(3) 0.0282(14) Uani 1 1 d . . . 
H42A H 0.7854 0.1695 0.8643 0.034 Uiso 1 1 calc R . . 
C43 C 0.7681(4) 0.2144(2) 0.7447(3) 0.0257(13) Uani 1 1 d . . . 
C44 C 0.7147(4) 0.1803(2) 0.7361(3) 0.0305(14) Uani 1 1 d . . . 
H44A H 0.7312 0.1497 0.7323 0.037 Uiso 1 1 calc R . . 
C45 C 0.6374(4) 0.1901(3) 0.7329(4) 0.0407(18) Uani 1 1 d . . . 
H45A H 0.6011 0.1663 0.7264 0.049 Uiso 1 1 calc R . . 
C46 C 0.6130(4) 0.2345(3) 0.7391(4) 0.0416(18) Uani 1 1 d . . . 
H46A H 0.5599 0.2412 0.7374 0.050 Uiso 1 1 calc R . . 
C47 C 0.6651(4) 0.2688(3) 0.7479(4) 0.0451(19) Uani 1 1 d . . . 
H47A H 0.6480 0.2992 0.7521 0.054 Uiso 1 1 calc R . . 
C48 C 0.7429(4) 0.2595(2) 0.7507(3) 0.0325(15) Uani 1 1 d . . . 
H48A H 0.7788 0.2834 0.7567 0.039 Uiso 1 1 calc R . . 
C49 C 1.0865(4) 0.3852(2) 0.4565(3) 0.0234(13) Uani 1 1 d . . . 
C50 C 1.0470(4) 0.4259(2) 0.4671(3) 0.0294(14) Uani 1 1 d . . . 
H50A H 1.0115 0.4277 0.5030 0.035 Uiso 1 1 calc R . . 
C51 C 1.0594(4) 0.4636(2) 0.4255(4) 0.0375(16) Uani 1 1 d . . . 
H51A H 1.0327 0.4911 0.4332 0.045 Uiso 1 1 calc R . . 
C52 C 1.1118(4) 0.4610(2) 0.3720(3) 0.0348(16) Uani 1 1 d . . . 
H52A H 1.1206 0.4866 0.3433 0.042 Uiso 1 1 calc R . . 
C53 C 1.1498(4) 0.4208(2) 0.3618(3) 0.0320(15) Uani 1 1 d . . . 
H53A H 1.1854 0.4188 0.3260 0.038 Uiso 1 1 calc R . . 
C54 C 1.1370(4) 0.3829(2) 0.4032(3) 0.0298(14) Uani 1 1 d . . . 
H54A H 1.1631 0.3552 0.3948 0.036 Uiso 1 1 calc R . . 
C55 C 1.1328(3) 0.29417(19) 0.4871(3) 0.0212(12) Uani 1 1 d . . . 
C56 C 1.2102(4) 0.3031(2) 0.5036(3) 0.0289(14) Uani 1 1 d . . . 
H56A H 1.2247 0.3298 0.5285 0.035 Uiso 1 1 calc R . . 
C57 C 1.2649(4) 0.2728(2) 0.4832(3) 0.0320(15) Uani 1 1 d . . . 
H57A H 1.3173 0.2791 0.4934 0.038 Uiso 1 1 calc R . . 
C58 C 1.2447(4) 0.2334(2) 0.4481(3) 0.0326(15) Uani 1 1 d . . . 
H58A H 1.2829 0.2126 0.4347 0.039 Uiso 1 1 calc R . . 
C59 C 1.1690(4) 0.2243(2) 0.4328(3) 0.0329(15) Uani 1 1 d . . . 
H59A H 1.1548 0.1972 0.4086 0.039 Uiso 1 1 calc R . . 
C60 C 1.1136(4) 0.2543(2) 0.4525(3) 0.0269(13) Uani 1 1 d . . . 
H60A H 1.0613 0.2475 0.4422 0.032 Uiso 1 1 calc R . . 
C61 C 0.7996(4) 0.0717(2) 0.6257(3) 0.0282(14) Uani 1 1 d . . . 
C62 C 0.7644(4) 0.0338(2) 0.5947(4) 0.0394(17) Uani 1 1 d . . . 
H62A H 0.7512 0.0342 0.5462 0.047 Uiso 1 1 calc R . . 
C63 C 0.7483(4) -0.0044(2) 0.6337(5) 0.049(2) Uani 1 1 d . . . 
H63A H 0.7249 -0.0302 0.6119 0.058 Uiso 1 1 calc R . . 
C64 C 0.7663(5) -0.0049(3) 0.7040(5) 0.051(2) Uani 1 1 d . . . 
H64A H 0.7543 -0.0309 0.7307 0.061 Uiso 1 1 calc R . . 
C65 C 0.8016(4) 0.0317(2) 0.7365(4) 0.0430(18) Uani 1 1 d . . . 
H65A H 0.8144 0.0309 0.7850 0.052 Uiso 1 1 calc R . . 
C66 C 0.8184(4) 0.0702(2) 0.6969(3) 0.0315(15) Uani 1 1 d . . . 
H66A H 0.8428 0.0956 0.7189 0.038 Uiso 1 1 calc R . . 
C67 C 0.8361(4) 0.1033(2) 0.4910(3) 0.0280(14) Uani 1 1 d . . . 
C68 C 0.7988(4) 0.1243(2) 0.4336(3) 0.0329(15) Uani 1 1 d . . . 
H68A H 0.7640 0.1486 0.4401 0.039 Uiso 1 1 calc R . . 
C69 C 0.8135(4) 0.1092(3) 0.3665(4) 0.0393(17) Uani 1 1 d . . . 
H69A H 0.7894 0.1239 0.3273 0.047 Uiso 1 1 calc R . . 
C70 C 0.8615(5) 0.0740(3) 0.3562(4) 0.047(2) Uani 1 1 d . . . 
H70A H 0.8696 0.0637 0.3103 0.057 Uiso 1 1 calc R . . 
C71 C 0.8991(4) 0.0528(3) 0.4126(4) 0.0450(19) Uani 1 1 d . . . 
H71A H 0.9329 0.0282 0.4054 0.054 Uiso 1 1 calc R . . 
C72 C 0.8865(4) 0.0681(2) 0.4798(4) 0.0374(16) Uani 1 1 d . . . 
H72A H 0.9129 0.0542 0.5184 0.045 Uiso 1 1 calc R . . 
C73 C 0.8232(4) 0.4182(2) 0.4966(3) 0.0254(13) Uani 1 1 d . . . 
C74 C 0.7880(4) 0.4563(2) 0.5265(3) 0.0297(14) Uani 1 1 d . . . 
H74A H 0.7748 0.4556 0.5739 0.036 Uiso 1 1 calc R . . 
C75 C 0.7728(4) 0.4949(2) 0.4864(4) 0.0373(17) Uani 1 1 d . . . 
H75A H 0.7478 0.5201 0.5062 0.045 Uiso 1 1 calc R . . 
C76 C 0.7935(4) 0.4968(2) 0.4192(4) 0.0389(18) Uani 1 1 d . . . 
H76A H 0.7819 0.5231 0.3922 0.047 Uiso 1 1 calc R . . 
C77 C 0.8313(4) 0.4608(2) 0.3895(3) 0.0370(17) Uani 1 1 d . . . 
H77A H 0.8466 0.4629 0.3428 0.044 Uiso 1 1 calc R . . 
C78 C 0.8468(4) 0.4217(2) 0.4284(3) 0.0291(14) Uani 1 1 d . . . 
H78A H 0.8736 0.3972 0.4083 0.035 Uiso 1 1 calc R . . 
C79 C 0.8538(4) 0.3832(2) 0.6330(3) 0.0267(14) Uani 1 1 d . . . 
C80 C 0.8079(4) 0.3671(2) 0.6858(3) 0.0319(15) Uani 1 1 d . . . 
H80A H 0.7676 0.3463 0.6751 0.038 Uiso 1 1 calc R . . 
C81 C 0.8219(4) 0.3818(2) 0.7534(3) 0.0360(17) Uani 1 1 d . . . 
H81A H 0.7907 0.3710 0.7891 0.043 Uiso 1 1 calc R . . 
C82 C 0.8804(4) 0.4120(2) 0.7703(3) 0.0353(16) Uani 1 1 d . . . 
H82A H 0.8896 0.4217 0.8170 0.042 Uiso 1 1 calc R . . 
C83 C 0.9256(4) 0.4280(2) 0.7175(3) 0.0316(15) Uani 1 1 d . . . 
H83A H 0.9655 0.4491 0.7280 0.038 Uiso 1 1 calc R . . 
C84 C 0.9119(4) 0.4131(2) 0.6490(3) 0.0295(14) Uani 1 1 d . . . 
H84A H 0.9432 0.4238 0.6133 0.035 Uiso 1 1 calc R . . 
C85 C 1.0719(4) 0.0986(2) 0.6805(3) 0.0263(13) Uani 1 1 d . . . 
C86 C 1.1357(4) 0.0997(2) 0.7249(3) 0.0318(15) Uani 1 1 d . . . 
H86A H 1.1683 0.1255 0.7249 0.038 Uiso 1 1 calc R . . 
C87 C 1.1531(5) 0.0640(2) 0.7695(4) 0.0427(18) Uani 1 1 d . . . 
H87A H 1.1974 0.0651 0.7998 0.051 Uiso 1 1 calc R . . 
C88 C 1.1054(5) 0.0268(3) 0.7696(4) 0.049(2) Uani 1 1 d . . . 
H88A H 1.1168 0.0022 0.8002 0.058 Uiso 1 1 calc R . . 
C89 C 1.0417(4) 0.0252(2) 0.7259(4) 0.0384(17) Uani 1 1 d . . . 
H89A H 1.0096 -0.0009 0.7257 0.046 Uiso 1 1 calc R . . 
C90 C 1.0238(4) 0.0611(2) 0.6821(3) 0.0323(15) Uani 1 1 d . . . 
H90A H 0.9786 0.0603 0.6530 0.039 Uiso 1 1 calc R . . 
C91 C 1.1201(3) 0.18731(19) 0.6373(3) 0.0215(12) Uani 1 1 d . . . 
C92 C 1.1108(4) 0.2248(2) 0.6801(3) 0.0278(14) Uani 1 1 d . . . 
H92A H 1.0640 0.2293 0.7023 0.033 Uiso 1 1 calc R . . 
C93 C 1.1700(4) 0.2556(2) 0.6906(4) 0.0323(15) Uani 1 1 d . . . 
H93A H 1.1639 0.2808 0.7207 0.039 Uiso 1 1 calc R . . 
C94 C 1.2375(4) 0.2501(2) 0.6576(3) 0.0332(16) Uani 1 1 d . . . 
H94A H 1.2768 0.2722 0.6633 0.040 Uiso 1 1 calc R . . 
C95 C 1.2480(4) 0.2128(2) 0.6168(3) 0.0343(16) Uani 1 1 d . . . 
H95A H 1.2956 0.2082 0.5962 0.041 Uiso 1 1 calc R . . 
C96 C 1.1896(4) 0.1816(2) 0.6053(3) 0.0284(14) Uani 1 1 d . . . 
H96A H 1.1969 0.1562 0.5757 0.034 Uiso 1 1 calc R . . 
C97 C 0.8921(4) 0.3318(2) 0.3046(3) 0.0261(13) Uani 1 1 d . . . 
C98 C 0.8404(4) 0.3387(2) 0.2494(3) 0.0360(16) Uani 1 1 d . . . 
H98A H 0.7934 0.3226 0.2472 0.043 Uiso 1 1 calc R . . 
C99 C 0.8570(5) 0.3689(3) 0.1974(4) 0.047(2) Uani 1 1 d . . . 
H99A H 0.8213 0.3732 0.1594 0.057 Uiso 1 1 calc R . . 
C100 C 0.9245(5) 0.3929(3) 0.1997(4) 0.049(2) Uani 1 1 d . . . 
H10A H 0.9350 0.4135 0.1633 0.059 Uiso 1 1 calc R . . 
C101 C 0.9764(4) 0.3871(3) 0.2543(3) 0.0378(16) Uani 1 1 d . . . 
H10B H 1.0227 0.4040 0.2563 0.045 Uiso 1 1 calc R . . 
C102 C 0.9606(4) 0.3561(2) 0.3070(3) 0.0327(15) Uani 1 1 d . . . 
H10C H 0.9967 0.3516 0.3446 0.039 Uiso 1 1 calc R . . 
C103 C 0.7742(3) 0.2827(2) 0.3709(3) 0.0244(13) Uani 1 1 d . . . 
C104 C 0.7436(4) 0.2394(2) 0.3721(3) 0.0316(15) Uani 1 1 d . . . 
H10D H 0.7762 0.2137 0.3709 0.038 Uiso 1 1 calc R . . 
C105 C 0.6653(4) 0.2336(3) 0.3749(4) 0.0409(17) Uani 1 1 d . . . 
H10E H 0.6446 0.2038 0.3759 0.049 Uiso 1 1 calc R . . 
C106 C 0.6181(4) 0.2701(3) 0.3761(4) 0.0412(18) Uani 1 1 d . . . 
H10F H 0.5646 0.2656 0.3784 0.049 Uiso 1 1 calc R . . 
C107 C 0.6472(4) 0.3135(2) 0.3738(3) 0.0341(15) Uani 1 1 d . . . 
H10G H 0.6139 0.3390 0.3731 0.041 Uiso 1 1 calc R . . 
C108 C 0.7247(4) 0.3194(2) 0.3728(3) 0.0304(14) Uani 1 1 d . . . 
H10H H 0.7449 0.3494 0.3733 0.036 Uiso 1 1 calc R . . 
B1 B 0.3519(7) 0.1142(3) 0.4867(5) 0.065(3) Uani 1 1 d D . . 
F1 F 0.4070(8) 0.0869(4) 0.4739(8) 0.276(9) Uani 1 1 d D . . 
F2 F 0.3148(6) 0.1226(3) 0.4254(3) 0.170(5) Uani 1 1 d D . . 
F3 F 0.3000(3) 0.09528(18) 0.5305(2) 0.0716(16) Uani 1 1 d D . . 
F4 F 0.3776(3) 0.15412(17) 0.5137(2) 0.0609(13) Uani 1 1 d D . . 
B2 B 0.8578(5) 0.1095(3) 0.1228(4) 0.0373(19) Uani 1 1 d D . . 
F5 F 0.8501(11) 0.1537(4) 0.1088(7) 0.074(5) Uani 0.50 1 d PD A . 
F6 F 0.8350(9) 0.1019(8) 0.1862(5) 0.087(7) Uani 0.50 1 d PD A . 
F7 F 0.9333(8) 0.1024(8) 0.1184(11) 0.107(10) Uani 0.50 1 d PD A . 
F8 F 0.8123(3) 0.08788(17) 0.0740(2) 0.0637(14) Uani 1 1 d D A . 
C1S C 0.5402(5) 0.0148(3) 0.6105(4) 0.0038(17) Uiso 0.50 1 d P . . 
H1SA H 0.5002 -0.0068 0.6241 0.005 Uiso 1 1 calc R . . 
H1SB H 0.5785 -0.0035 0.5865 0.005 Uiso 1 1 calc R . . 
C2S C 0.2830(9) 1.0057(6) 0.6136(8) 0.134(6) Uiso 1 1 d . . . 
H2SA H 0.2803 1.0377 0.5978 0.161 Uiso 1 1 calc R . . 
H2SB H 0.2319 0.9915 0.6082 0.161 Uiso 1 1 calc R . . 
C3S C 0.5446(6) 0.4717(4) 0.5904(5) 0.081(3) Uiso 1 1 d . . . 
H3SA H 0.4990 0.4518 0.5900 0.098 Uiso 1 1 calc R . . 
H3SB H 0.5284 0.5029 0.6023 0.098 Uiso 1 1 calc R . . 
Cl1 Cl 0.4992(4) 0.0470(2) 0.5497(3) 0.0990(19) Uani 0.50 1 d P . . 
Cl2 Cl 0.5811(4) 0.0304(2) 0.6803(3) 0.104(2) Uani 0.50 1 d P . . 
Cl3 Cl 0.3233(3) 1.00071(11) 0.70305(19) 0.155(2) Uani 1 1 d . . . 
Cl4 Cl 0.3649(3) 0.96924(12) 0.56337(17) 0.1467(19) Uani 1 1 d . . . 
Cl5 Cl 0.58308(15) 0.47150(9) 0.50903(13) 0.0718(7) Uani 1 1 d . . . 
Cl6 Cl 0.61454(17) 0.45162(9) 0.65517(12) 0.0750(7) Uani 1 1 d . . . 
F5A F 0.9224(9) 0.1268(8) 0.1020(10) 0.098(8) Uani 0.50 1 d P A 2 
F6A F 0.8193(10) 0.1421(9) 0.1559(17) 0.158(11) Uani 0.50 1 d P A 2 
F7A F 0.8767(16) 0.0818(8) 0.1758(13) 0.157(11) Uani 0.50 1 d P A 2 
  
loop_ 
 _atom_site_aniso_label 
 _atom_site_aniso_U_11 
 _atom_site_aniso_U_22 
 _atom_site_aniso_U_33 
 _atom_site_aniso_U_23 
 _atom_site_aniso_U_13 
 _atom_site_aniso_U_12 
Au1 0.0227(2) 0.0180(4) 0.0206(8) -0.0021(5) 0.0035(5) 0.0023(2) 
Pd1 0.0186(10) 0.02068(17) 0.01976(17) -0.00050(11) 0.0003(6) -0.0025(5) 
Pd2 0.0227(2) 0.0180(4) 0.0206(8) -0.0021(5) 0.0035(5) 0.0023(2) 
Au2 0.0186(10) 0.02068(17) 0.01976(17) -0.00050(11) 0.0003(6) -0.0025(5) 
Tl1 0.0513(2) 0.0615(2) 0.0526(2) 0.00097(16) 0.00832(15) 0.00783(17) 
P1 0.0206(8) 0.0163(7) 0.0226(7) 0.0006(6) 0.0052(6) 0.0010(6) 
P2 0.0220(8) 0.0199(8) 0.0193(7) 0.0005(5) 0.0019(6) -0.0035(6) 
P3 0.0249(8) 0.0175(8) 0.0282(8) -0.0032(6) 0.0033(6) -0.0014(6) 
P4 0.0253(8) 0.0163(7) 0.0242(7) 0.0006(6) 0.0024(6) 0.0007(6) 
P5 0.0237(8) 0.0200(8) 0.0222(7) -0.0027(6) 0.0023(6) 0.0041(6) 
P6 0.0239(8) 0.0237(8) 0.0225(7) -0.0017(6) -0.0029(6) 0.0009(7) 
N1 0.017(2) 0.016(2) 0.022(2) 0.0006(18) -0.0006(19) 0.0024(19) 
N2 0.025(3) 0.017(3) 0.020(2) -0.0009(18) -0.0041(19) -0.001(2) 
N3 0.026(3) 0.018(3) 0.026(3) -0.0007(19) 0.002(2) -0.003(2) 
N4 0.025(3) 0.017(3) 0.025(3) 0.0007(19) 0.002(2) 0.003(2) 
N5 0.021(3) 0.028(3) 0.025(3) -0.008(2) -0.001(2) 0.000(2) 
N6 0.021(3) 0.028(3) 0.024(3) -0.005(2) 0.002(2) -0.002(2) 
C1 0.021(3) 0.021(3) 0.026(3) 0.000(2) 0.005(2) 0.003(2) 
C2 0.023(3) 0.019(3) 0.025(3) 0.003(2) 0.008(2) 0.001(2) 
C3 0.032(4) 0.021(3) 0.023(3) -0.002(2) 0.005(2) 0.006(3) 
C4 0.031(4) 0.015(3) 0.026(3) 0.000(2) 0.001(3) -0.001(2) 
C5 0.019(3) 0.020(3) 0.021(3) 0.001(2) -0.001(2) 0.006(2) 
C6 0.026(3) 0.014(3) 0.021(3) -0.002(2) 0.004(2) 0.003(2) 
C7 0.030(3) 0.016(3) 0.025(3) 0.000(2) -0.004(2) -0.004(3) 
C8 0.030(4) 0.024(3) 0.035(3) 0.001(3) -0.004(3) -0.008(3) 
C9 0.032(4) 0.023(3) 0.028(3) 0.001(2) 0.002(3) -0.011(3) 
C10 0.025(3) 0.017(3) 0.026(3) 0.000(2) 0.000(2) -0.005(2) 
C11 0.038(4) 0.019(3) 0.024(3) -0.009(2) -0.001(3) 0.004(3) 
C12 0.040(4) 0.019(3) 0.029(3) -0.005(2) -0.006(3) -0.005(3) 
C13 0.026(3) 0.023(3) 0.027(3) -0.001(2) 0.005(2) -0.003(3) 
C14 0.030(4) 0.019(3) 0.039(4) -0.004(3) 0.006(3) -0.003(3) 
C15 0.026(3) 0.025(3) 0.037(3) -0.005(3) 0.000(3) -0.007(3) 
C16 0.030(3) 0.024(3) 0.020(3) -0.001(2) 0.002(2) -0.002(3) 
C17 0.025(3) 0.029(3) 0.022(3) -0.004(2) 0.004(2) 0.000(3) 
C18 0.028(3) 0.022(3) 0.018(3) 0.002(2) 0.002(2) 0.001(3) 
C19 0.025(3) 0.025(3) 0.030(3) 0.001(3) -0.002(3) 0.003(3) 
C20 0.031(4) 0.029(4) 0.042(4) -0.003(3) 0.002(3) 0.011(3) 
C21 0.030(4) 0.013(3) 0.052(4) 0.002(3) -0.001(3) 0.000(3) 
C22 0.026(3) 0.025(3) 0.022(3) 0.000(2) 0.004(2) 0.001(3) 
C23 0.023(3) 0.035(4) 0.032(3) -0.002(3) 0.001(3) -0.008(3) 
C24 0.025(3) 0.028(4) 0.038(4) 0.001(3) -0.001(3) 0.005(3) 
C25 0.019(3) 0.026(3) 0.031(3) -0.005(3) 0.001(2) 0.002(3) 
C26 0.037(4) 0.035(4) 0.027(3) -0.005(3) -0.001(3) 0.017(3) 
C27 0.045(4) 0.030(4) 0.032(3) -0.009(3) 0.006(3) 0.018(3) 
C28 0.038(4) 0.025(3) 0.032(3) -0.008(3) 0.007(3) 0.003(3) 
C29 0.024(3) 0.024(3) 0.024(3) -0.002(2) 0.002(2) 0.002(3) 
C30 0.028(3) 0.025(3) 0.020(3) -0.007(2) 0.003(2) -0.002(3) 
C31 0.028(3) 0.035(4) 0.019(3) -0.003(2) -0.003(2) -0.003(3) 
C32 0.033(4) 0.033(4) 0.023(3) -0.009(3) -0.001(3) -0.004(3) 
C33 0.035(4) 0.032(4) 0.025(3) -0.002(3) -0.008(3) -0.003(3) 
C34 0.022(3) 0.026(3) 0.027(3) -0.007(2) -0.002(2) -0.005(3) 
C35 0.039(4) 0.033(4) 0.030(3) -0.013(3) 0.004(3) 0.010(3) 
C36 0.037(4) 0.032(4) 0.029(3) -0.013(3) 0.009(3) -0.003(3) 
C37 0.024(3) 0.011(3) 0.026(3) -0.002(2) 0.003(2) 0.002(2) 
C38 0.025(3) 0.027(3) 0.029(3) 0.000(3) 0.007(3) 0.004(3) 
C39 0.028(4) 0.026(3) 0.036(3) 0.005(3) 0.006(3) 0.004(3) 
C40 0.038(4) 0.030(4) 0.029(3) 0.006(3) 0.002(3) 0.001(3) 
C41 0.038(4) 0.036(4) 0.035(4) 0.013(3) 0.012(3) 0.007(3) 
C42 0.031(4) 0.026(3) 0.028(3) 0.007(2) 0.004(3) 0.012(3) 
C43 0.025(3) 0.033(4) 0.020(3) 0.003(2) 0.006(2) 0.011(3) 
C44 0.026(3) 0.034(4) 0.032(3) -0.002(3) 0.008(3) 0.001(3) 
C45 0.028(4) 0.057(5) 0.038(4) 0.005(3) 0.009(3) 0.000(4) 
C46 0.020(4) 0.064(5) 0.040(4) 0.003(4) 0.001(3) 0.009(4) 
C47 0.040(5) 0.045(5) 0.049(4) 0.003(4) -0.003(3) 0.021(4) 
C48 0.034(4) 0.031(4) 0.033(3) 0.001(3) 0.004(3) 0.006(3) 
C49 0.027(3) 0.018(3) 0.025(3) 0.003(2) -0.004(2) -0.005(3) 
C50 0.039(4) 0.023(3) 0.027(3) -0.001(2) 0.011(3) -0.001(3) 
C51 0.044(4) 0.021(3) 0.047(4) 0.003(3) 0.004(3) -0.002(3) 
C52 0.052(5) 0.017(3) 0.036(4) 0.007(3) -0.001(3) -0.012(3) 
C53 0.041(4) 0.030(4) 0.026(3) 0.008(3) 0.008(3) -0.006(3) 
C54 0.034(4) 0.025(3) 0.031(3) 0.005(3) 0.004(3) -0.002(3) 
C55 0.028(3) 0.020(3) 0.017(3) 0.004(2) 0.005(2) 0.002(2) 
C56 0.026(3) 0.039(4) 0.022(3) 0.006(3) -0.001(2) -0.003(3) 
C57 0.025(3) 0.036(4) 0.035(3) 0.014(3) 0.005(3) 0.001(3) 
C58 0.034(4) 0.030(4) 0.035(4) 0.011(3) 0.016(3) 0.009(3) 
C59 0.038(4) 0.027(4) 0.034(3) -0.001(3) 0.009(3) -0.001(3) 
C60 0.026(3) 0.024(3) 0.031(3) -0.002(2) 0.004(3) 0.001(3) 
C61 0.027(3) 0.019(3) 0.040(4) -0.001(3) 0.011(3) 0.004(3) 
C62 0.039(4) 0.024(4) 0.054(4) -0.006(3) -0.004(3) -0.004(3) 
C63 0.044(5) 0.018(4) 0.084(6) -0.007(4) 0.005(4) -0.006(3) 
C64 0.049(5) 0.024(4) 0.079(6) 0.017(4) 0.014(4) -0.002(4) 
C65 0.049(5) 0.032(4) 0.049(4) 0.010(3) 0.010(4) 0.001(4) 
C66 0.035(4) 0.018(3) 0.042(4) 0.001(3) 0.006(3) -0.001(3) 
C67 0.027(3) 0.025(3) 0.032(3) -0.011(3) 0.004(3) -0.007(3) 
C68 0.033(4) 0.026(3) 0.040(4) -0.005(3) 0.006(3) -0.003(3) 
C69 0.042(4) 0.043(4) 0.033(4) -0.005(3) 0.004(3) -0.008(4) 
C70 0.053(5) 0.048(5) 0.040(4) -0.021(4) 0.004(4) -0.007(4) 
C71 0.045(5) 0.042(4) 0.049(4) -0.018(4) 0.004(4) 0.011(4) 
C72 0.040(4) 0.034(4) 0.038(4) -0.015(3) -0.001(3) 0.001(3) 
C73 0.024(3) 0.017(3) 0.035(3) 0.005(2) -0.007(3) -0.005(2) 
C74 0.033(4) 0.020(3) 0.035(3) 0.001(3) 0.002(3) 0.002(3) 
C75 0.039(4) 0.013(3) 0.059(5) 0.000(3) -0.007(3) 0.000(3) 
C76 0.051(5) 0.023(4) 0.040(4) 0.012(3) -0.017(3) -0.006(3) 
C77 0.049(5) 0.034(4) 0.027(3) 0.011(3) -0.007(3) -0.009(3) 
C78 0.033(4) 0.020(3) 0.034(3) 0.003(3) 0.000(3) -0.002(3) 
C79 0.038(4) 0.017(3) 0.025(3) -0.001(2) 0.005(3) 0.011(3) 
C80 0.039(4) 0.023(3) 0.034(3) 0.002(3) 0.004(3) 0.007(3) 
C81 0.054(5) 0.030(4) 0.025(3) 0.003(3) 0.012(3) 0.019(3) 
C82 0.053(5) 0.027(4) 0.026(3) -0.008(3) -0.004(3) 0.018(3) 
C83 0.040(4) 0.022(3) 0.032(3) -0.003(3) -0.003(3) 0.011(3) 
C84 0.034(4) 0.025(3) 0.030(3) -0.001(3) 0.001(3) 0.003(3) 
C85 0.030(4) 0.022(3) 0.027(3) -0.006(2) 0.003(3) 0.004(3) 
C86 0.036(4) 0.027(4) 0.032(3) 0.000(3) 0.000(3) 0.001(3) 
C87 0.054(5) 0.028(4) 0.046(4) 0.001(3) -0.005(4) 0.006(4) 
C88 0.074(6) 0.029(4) 0.044(4) 0.005(3) 0.012(4) 0.019(4) 
C89 0.052(5) 0.019(3) 0.044(4) -0.001(3) 0.005(3) 0.004(3) 
C90 0.033(4) 0.027(4) 0.038(4) -0.005(3) 0.005(3) 0.000(3) 
C91 0.021(3) 0.018(3) 0.026(3) 0.002(2) 0.002(2) 0.004(2) 
C92 0.029(4) 0.026(3) 0.028(3) -0.006(3) -0.001(3) 0.005(3) 
C93 0.030(4) 0.026(3) 0.041(4) -0.002(3) -0.004(3) 0.006(3) 
C94 0.027(4) 0.033(4) 0.038(4) 0.016(3) -0.013(3) -0.001(3) 
C95 0.033(4) 0.042(4) 0.029(3) 0.007(3) 0.002(3) 0.002(3) 
C96 0.027(3) 0.031(4) 0.028(3) 0.003(3) 0.004(3) -0.002(3) 
C97 0.032(4) 0.026(3) 0.020(3) -0.002(2) 0.001(2) -0.003(3) 
C98 0.038(4) 0.035(4) 0.033(4) 0.003(3) -0.009(3) -0.011(3) 
C99 0.059(5) 0.050(5) 0.032(4) 0.012(3) -0.013(3) -0.018(4) 
C100 0.053(5) 0.056(5) 0.038(4) 0.015(4) -0.002(4) -0.016(4) 
C101 0.035(4) 0.044(4) 0.034(4) 0.001(3) 0.003(3) -0.009(3) 
C102 0.024(3) 0.047(4) 0.027(3) -0.002(3) 0.003(3) -0.003(3) 
C103 0.020(3) 0.029(3) 0.025(3) -0.001(2) 0.001(2) -0.004(3) 
C104 0.028(4) 0.029(4) 0.037(4) 0.004(3) -0.002(3) -0.005(3) 
C105 0.035(4) 0.038(4) 0.049(4) -0.001(3) -0.001(3) -0.011(3) 
C106 0.023(4) 0.058(5) 0.042(4) 0.005(4) -0.006(3) -0.002(4) 
C107 0.029(4) 0.040(4) 0.034(4) -0.001(3) -0.002(3) 0.005(3) 
C108 0.028(4) 0.027(3) 0.036(3) -0.003(3) -0.004(3) 0.001(3) 
B1 0.110(10) 0.023(5) 0.066(7) 0.008(4) 0.043(7) 0.016(5) 
F1 0.266(14) 0.113(8) 0.47(2) 0.038(10) 0.242(15) 0.103(9) 
F2 0.350(14) 0.124(7) 0.036(3) -0.008(3) 0.023(5) -0.142(8) 
F3 0.097(4) 0.066(4) 0.052(3) 0.013(2) 0.019(3) -0.023(3) 
F4 0.070(3) 0.065(3) 0.048(3) 0.004(2) 0.007(2) -0.020(3) 
B2 0.039(5) 0.038(5) 0.035(4) 0.000(3) -0.001(3) -0.003(4) 
F5 0.121(15) 0.041(6) 0.057(7) -0.005(6) -0.046(8) 0.019(8) 
F6 0.066(10) 0.17(2) 0.020(5) -0.001(8) 0.007(6) -0.018(10) 
F7 0.054(10) 0.17(2) 0.092(14) -0.034(14) -0.019(9) 0.075(14) 
F8 0.081(4) 0.068(3) 0.041(2) 0.000(2) -0.004(2) -0.039(3) 
Cl1 0.117(5) 0.083(4) 0.097(4) 0.000(3) 0.009(4) 0.001(4) 
Cl2 0.112(5) 0.101(5) 0.100(4) -0.002(4) 0.009(4) 0.036(4) 
Cl3 0.322(7) 0.0507(18) 0.096(2) 0.0011(16) 0.064(3) 0.027(3) 
Cl4 0.282(6) 0.074(2) 0.079(2) 0.0267(17) -0.055(3) 0.000(3) 
Cl5 0.0734(17) 0.0731(17) 0.0688(15) 0.0089(12) 0.0044(12) 0.0135(13) 
Cl6 0.094(2) 0.0731(17) 0.0583(14) -0.0028(12) 0.0055(13) -0.0178(15) 
F5A 0.068(12) 0.16(2) 0.070(10) -0.035(12) 0.020(9) -0.081(13) 
F6A 0.074(12) 0.14(2) 0.25(3) -0.14(2) -0.048(17) 0.054(13) 
F7A 0.18(2) 0.136(19) 0.143(18) 0.106(15) -0.106(16) -0.076(17) 
  
_geom_special_details 
; 
 All esds (except the esd in the dihedral angle between two l.s. planes) 
 are estimated using the full covariance matrix.  The cell esds are taken 
 into account individually in the estimation of esds in distances, angles 
 and torsion angles; correlations between esds in cell parameters are only 
 used when they are defined by crystal symmetry.  An approximate (isotropic) 
 treatment of cell esds is used for estimating esds involving l.s. planes. 
; 
  
loop_ 
 _geom_bond_atom_site_label_1 
 _geom_bond_atom_site_label_2 
 _geom_bond_distance 
 _geom_bond_site_symmetry_2 
 _geom_bond_publ_flag 
Au1 P3 2.401(8) . ? 
Au1 P5 2.343(9) . ? 
Au1 P1 2.302(8) . ? 
Au1 Tl1 2.793(6) . ? 
Pd1 P6 2.316(15) . ? 
Pd1 P2 2.413(13) . ? 
Pd1 P4 2.322(15) . ? 
Pd1 Tl1 2.780(12) . ? 
Pd2 P1 2.387(15) . ? 
Pd2 P5 2.325(17) . ? 
Pd2 P3 2.334(16) . ? 
Pd2 Tl1 2.773(12) . ? 
Au2 P4 2.404(7) . ? 
Au2 P2 2.299(6) . ? 
Au2 P6 2.352(7) . ? 
Au2 Tl1 2.804(6) . ? 
P1 C37 1.825(6) . ? 
P1 C43 1.827(6) . ? 
P1 C1 1.855(6) . ? 
P2 C55 1.814(6) . ? 
P2 C10 1.829(6) . ? 
P2 C49 1.837(6) . ? 
P3 C67 1.827(6) . ? 
P3 C61 1.829(6) . ? 
P3 C13 1.833(6) . ? 
P4 C73 1.823(6) . ? 
P4 C79 1.837(6) . ? 
P4 C22 1.851(6) . ? 
P5 C91 1.809(6) . ? 
P5 C85 1.834(6) . ? 
P5 C25 1.833(6) . ? 
P6 C103 1.817(6) . ? 
P6 C97 1.831(6) . ? 
P6 C34 1.847(6) . ? 
N1 C1 1.314(7) . ? 
N1 C5 1.375(7) . ? 
N2 C10 1.329(7) . ? 
N2 C6 1.356(7) . ? 
N3 C13 1.339(8) . ? 
N3 C17 1.353(8) . ? 
N4 C22 1.339(8) . ? 
N4 C18 1.363(8) . ? 
N5 C25 1.345(8) . ? 
N5 C29 1.351(7) . ? 
N6 C34 1.331(8) . ? 
N6 C30 1.376(7) . ? 
C1 C2 1.394(8) . ? 
C2 C3 1.360(8) . ? 
C3 C4 1.414(8) . ? 
C4 C5 1.402(8) . ? 
C4 C11 1.433(8) . ? 
C5 C6 1.444(8) . ? 
C6 C7 1.415(8) . ? 
C7 C8 1.393(9) . ? 
C7 C12 1.422(8) . ? 
C8 C9 1.394(8) . ? 
C9 C10 1.413(8) . ? 
C11 C12 1.342(9) . ? 
C13 C14 1.408(9) . ? 
C14 C15 1.343(9) . ? 
C15 C16 1.411(9) . ? 
C16 C17 1.418(9) . ? 
C16 C23 1.435(9) . ? 
C17 C18 1.448(9) . ? 
C18 C19 1.406(8) . ? 
C19 C20 1.398(9) . ? 
C19 C24 1.444(9) . ? 
C20 C21 1.376(9) . ? 
C21 C22 1.387(9) . ? 
C23 C24 1.347(9) . ? 
C25 C26 1.391(8) . ? 
C26 C27 1.365(8) . ? 
C27 C28 1.413(9) . ? 
C28 C29 1.413(8) . ? 
C28 C35 1.427(8) . ? 
C29 C30 1.440(8) . ? 
C30 C31 1.439(8) . ? 
C31 C32 1.382(9) . ? 
C31 C36 1.424(9) . ? 
C32 C33 1.359(9) . ? 
C33 C34 1.386(8) . ? 
C35 C36 1.354(9) . ? 
C37 C42 1.382(8) . ? 
C37 C38 1.393(8) . ? 
C38 C39 1.395(8) . ? 
C39 C40 1.385(9) . ? 
C40 C41 1.380(9) . ? 
C41 C42 1.389(8) . ? 
C43 C44 1.376(9) . ? 
C43 C48 1.405(9) . ? 
C44 C45 1.385(9) . ? 
C45 C46 1.382(11) . ? 
C46 C47 1.366(11) . ? 
C47 C48 1.388(10) . ? 
C49 C54 1.384(9) . ? 
C49 C50 1.402(9) . ? 
C50 C51 1.391(9) . ? 
C51 C52 1.411(10) . ? 
C52 C53 1.377(10) . ? 
C53 C54 1.395(8) . ? 
C55 C60 1.382(8) . ? 
C55 C56 1.403(9) . ? 
C56 C57 1.380(9) . ? 
C57 C58 1.381(10) . ? 
C58 C59 1.372(10) . ? 
C59 C60 1.379(9) . ? 
C61 C66 1.394(9) . ? 
C61 C62 1.397(9) . ? 
C62 C63 1.387(10) . ? 
C63 C64 1.375(12) . ? 
C64 C65 1.377(11) . ? 
C65 C66 1.404(9) . ? 
C67 C72 1.385(9) . ? 
C67 C68 1.401(9) . ? 
C68 C69 1.399(9) . ? 
C69 C70 1.354(11) . ? 
C70 C71 1.391(11) . ? 
C71 C72 1.395(9) . ? 
C73 C78 1.395(9) . ? 
C73 C74 1.415(9) . ? 
C74 C75 1.391(9) . ? 
C75 C76 1.358(10) . ? 
C76 C77 1.384(10) . ? 
C77 C78 1.394(9) . ? 
C79 C84 1.371(9) . ? 
C79 C80 1.405(9) . ? 
C80 C81 1.382(9) . ? 
C81 C82 1.385(10) . ? 
C82 C83 1.395(10) . ? 
C83 C84 1.398(8) . ? 
C85 C86 1.376(9) . ? 
C85 C90 1.389(9) . ? 
C86 C87 1.381(9) . ? 
C87 C88 1.378(11) . ? 
C88 C89 1.370(11) . ? 
C89 C90 1.380(9) . ? 
C91 C92 1.391(8) . ? 
C91 C96 1.399(8) . ? 
C92 C93 1.386(9) . ? 
C93 C94 1.374(10) . ? 
C94 C95 1.366(10) . ? 
C95 C96 1.385(9) . ? 
C97 C98 1.380(9) . ? 
C97 C102 1.396(9) . ? 
C98 C99 1.377(9) . ? 
C99 C100 1.376(11) . ? 
C100 C101 1.369(10) . ? 
C101 C102 1.400(9) . ? 
C103 C104 1.381(9) . ? 
C103 C108 1.389(9) . ? 
C104 C105 1.385(10) . ? 
C105 C106 1.356(11) . ? 
C106 C107 1.377(10) . ? 
C107 C108 1.371(9) . ? 
B1 F1 1.289(11) . ? 
B1 F2 1.344(12) . ? 
B1 F4 1.352(10) . ? 
B1 F3 1.382(10) . ? 
B2 F5A 1.319(16) . ? 
B2 F6 1.317(12) . ? 
B2 F5 1.334(12) . ? 
B2 F7A 1.335(16) . ? 
B2 F7 1.345(14) . ? 
B2 F6A 1.349(17) . ? 
B2 F8 1.363(8) . ? 
F5 F6A 1.13(3) . ? 
F5 F5A 1.51(2) . ? 
F6 F7A 0.97(3) . ? 
F6 F6A 1.34(3) . ? 
F7 F5A 0.80(3) . ? 
F7 F7A 1.63(3) . ? 
C1S Cl2 1.563(10) . ? 
C1S Cl1 1.646(10) . ? 
C2S Cl3 1.836(15) . ? 
C2S Cl4 2.065(16) . ? 
C3S Cl5 1.731(10) . ? 
C3S Cl6 1.807(11) . ? 
  
loop_ 
 _geom_angle_atom_site_label_1 
 _geom_angle_atom_site_label_2 
 _geom_angle_atom_site_label_3 
 _geom_angle 
 _geom_angle_site_symmetry_1 
 _geom_angle_site_symmetry_3 
 _geom_angle_publ_flag 
P3 Au1 P5 114.4(3) . . ? 
P3 Au1 P1 114.1(4) . . ? 
P5 Au1 P1 127.8(4) . . ? 
P3 Au1 Tl1 95.0(2) . . ? 
P5 Au1 Tl1 98.0(3) . . ? 
P1 Au1 Tl1 95.8(2) . . ? 
P6 Pd1 P2 122.8(6) . . ? 
P6 Pd1 P4 115.4(6) . . ? 
P2 Pd1 P4 116.9(6) . . ? 
P6 Pd1 Tl1 98.0(5) . . ? 
P2 Pd1 Tl1 99.5(4) . . ? 
P4 Pd1 Tl1 94.4(4) . . ? 
P1 Pd2 P5 124.6(7) . . ? 
P1 Pd2 P3 113.4(7) . . ? 
P5 Pd2 P3 117.7(6) . . ? 
P1 Pd2 Tl1 94.4(4) . . ? 
P5 Pd2 Tl1 99.0(5) . . ? 
P3 Pd2 Tl1 97.1(5) . . ? 
P4 Au2 P2 118.1(3) . . ? 
P4 Au2 P6 111.0(3) . . ? 
P2 Au2 P6 126.4(3) . . ? 
P4 Au2 Tl1 91.93(19) . . ? 
P2 Au2 Tl1 101.7(2) . . ? 
P6 Au2 Tl1 96.5(2) . . ? 
Pd1 Tl1 Pd2 169.7(5) . . ? 
Pd1 Tl1 Au1 169.6(3) . . ? 
Pd2 Tl1 Au1 1.9(4) . . ? 
Pd1 Tl1 Au2 2.4(4) . . ? 
Pd2 Tl1 Au2 167.3(4) . . ? 
Au1 Tl1 Au2 167.2(2) . . ? 
C37 P1 C43 104.1(3) . . ? 
C37 P1 C1 101.8(3) . . ? 
C43 P1 C1 103.0(3) . . ? 
C37 P1 Pd2 107.9(3) . . ? 
C43 P1 Pd2 117.9(4) . . ? 
C1 P1 Pd2 120.0(4) . . ? 
C37 P1 Au1 107.4(2) . . ? 
C43 P1 Au1 118.8(3) . . ? 
C1 P1 Au1 119.5(3) . . ? 
Pd2 P1 Au1 1.0(6) . . ? 
C55 P2 C10 104.4(3) . . ? 
C55 P2 C49 102.8(3) . . ? 
C10 P2 C49 104.6(3) . . ? 
C55 P2 Pd1 123.6(4) . . ? 
C10 P2 Pd1 111.4(4) . . ? 
C49 P2 Pd1 108.4(3) . . ? 
C55 P2 Au2 122.9(3) . . ? 
C10 P2 Au2 112.2(3) . . ? 
C49 P2 Au2 108.3(2) . . ? 
Pd1 P2 Au2 0.9(6) . . ? 
C67 P3 C61 102.4(3) . . ? 
C67 P3 C13 102.5(3) . . ? 
C61 P3 C13 104.0(3) . . ? 
C67 P3 Au1 123.7(3) . . ? 
C61 P3 Au1 109.4(3) . . ? 
C13 P3 Au1 112.7(3) . . ? 
C67 P3 Pd2 122.1(4) . . ? 
C61 P3 Pd2 110.3(4) . . ? 
C13 P3 Pd2 113.5(4) . . ? 
Au1 P3 Pd2 1.6(6) . . ? 
C73 P4 C79 102.1(3) . . ? 
C73 P4 C22 104.6(3) . . ? 
C79 P4 C22 101.1(3) . . ? 
C73 P4 Au2 108.5(3) . . ? 
C79 P4 Au2 123.6(3) . . ? 
C22 P4 Au2 114.9(2) . . ? 
C73 P4 Pd1 108.9(4) . . ? 
C79 P4 Pd1 125.2(4) . . ? 
C22 P4 Pd1 112.9(4) . . ? 
Au2 P4 Pd1 2.1(5) . . ? 
C91 P5 C85 104.4(3) . . ? 
C91 P5 C25 102.4(3) . . ? 
C85 P5 C25 104.8(3) . . ? 
C91 P5 Pd2 123.3(4) . . ? 
C85 P5 Pd2 110.5(4) . . ? 
C25 P5 Pd2 109.9(4) . . ? 
C91 P5 Au1 122.0(3) . . ? 
C85 P5 Au1 109.7(3) . . ? 
C25 P5 Au1 112.1(3) . . ? 
Pd2 P5 Au1 2.3(5) . . ? 
C103 P6 C97 103.5(3) . . ? 
C103 P6 C34 103.1(3) . . ? 
C97 P6 C34 103.0(3) . . ? 
C103 P6 Pd1 114.8(4) . . ? 
C97 P6 Pd1 111.1(4) . . ? 
C34 P6 Pd1 119.5(4) . . ? 
C103 P6 Au2 117.6(2) . . ? 
C97 P6 Au2 110.1(2) . . ? 
C34 P6 Au2 117.8(3) . . ? 
Pd1 P6 Au2 2.8(5) . . ? 
C1 N1 C5 116.9(5) . . ? 
C10 N2 C6 118.0(5) . . ? 
C13 N3 C17 118.4(5) . . ? 
C22 N4 C18 117.9(5) . . ? 
C25 N5 C29 117.5(5) . . ? 
C34 N6 C30 117.5(5) . . ? 
N1 C1 C2 124.4(6) . . ? 
N1 C1 P1 114.7(4) . . ? 
C2 C1 P1 120.9(4) . . ? 
C3 C2 C1 119.7(5) . . ? 
C2 C3 C4 118.1(5) . . ? 
C5 C4 C3 118.6(5) . . ? 
C5 C4 C11 119.8(5) . . ? 
C3 C4 C11 121.5(5) . . ? 
N1 C5 C4 122.1(5) . . ? 
N1 C5 C6 118.0(5) . . ? 
C4 C5 C6 119.9(5) . . ? 
N2 C6 C7 122.4(5) . . ? 
N2 C6 C5 119.4(5) . . ? 
C7 C6 C5 118.2(5) . . ? 
C8 C7 C6 118.2(5) . . ? 
C8 C7 C12 122.0(6) . . ? 
C6 C7 C12 119.8(5) . . ? 
C7 C8 C9 119.7(6) . . ? 
C8 C9 C10 117.5(5) . . ? 
N2 C10 C9 124.0(5) . . ? 
N2 C10 P2 112.7(4) . . ? 
C9 C10 P2 123.3(4) . . ? 
C12 C11 C4 120.2(5) . . ? 
C11 C12 C7 121.8(6) . . ? 
N3 C13 C14 122.7(6) . . ? 
N3 C13 P3 114.8(4) . . ? 
C14 C13 P3 122.5(5) . . ? 
C15 C14 C13 119.4(6) . . ? 
C14 C15 C16 119.8(6) . . ? 
C15 C16 C17 117.8(6) . . ? 
C15 C16 C23 121.3(6) . . ? 
C17 C16 C23 120.9(6) . . ? 
N3 C17 C16 121.8(6) . . ? 
N3 C17 C18 120.2(5) . . ? 
C16 C17 C18 118.0(5) . . ? 
N4 C18 C19 121.7(5) . . ? 
N4 C18 C17 119.0(5) . . ? 
C19 C18 C17 119.2(6) . . ? 
C20 C19 C18 118.9(6) . . ? 
C20 C19 C24 120.0(6) . . ? 
C18 C19 C24 121.1(6) . . ? 
C21 C20 C19 118.7(6) . . ? 
C20 C21 C22 119.4(6) . . ? 
N4 C22 C21 123.3(6) . . ? 
N4 C22 P4 115.5(4) . . ? 
C21 C22 P4 121.1(5) . . ? 
C24 C23 C16 121.1(6) . . ? 
C23 C24 C19 119.6(6) . . ? 
N5 C25 C26 123.4(5) . . ? 
N5 C25 P5 111.7(4) . . ? 
C26 C25 P5 124.8(5) . . ? 
C27 C26 C25 119.2(6) . . ? 
C26 C27 C28 119.6(6) . . ? 
C27 C28 C29 117.3(5) . . ? 
C27 C28 C35 122.1(6) . . ? 
C29 C28 C35 120.5(6) . . ? 
N5 C29 C28 122.9(6) . . ? 
N5 C29 C30 118.2(5) . . ? 
C28 C29 C30 118.8(5) . . ? 
N6 C30 C31 120.9(5) . . ? 
N6 C30 C29 119.5(5) . . ? 
C31 C30 C29 119.5(5) . . ? 
C32 C31 C36 122.8(6) . . ? 
C32 C31 C30 118.3(6) . . ? 
C36 C31 C30 118.9(6) . . ? 
C33 C32 C31 119.6(6) . . ? 
C32 C33 C34 119.7(6) . . ? 
N6 C34 C33 123.8(6) . . ? 
N6 C34 P6 114.3(4) . . ? 
C33 C34 P6 121.9(5) . . ? 
C36 C35 C28 120.6(6) . . ? 
C35 C36 C31 121.6(6) . . ? 
C42 C37 C38 118.7(5) . . ? 
C42 C37 P1 123.8(5) . . ? 
C38 C37 P1 117.5(4) . . ? 
C37 C38 C39 120.9(6) . . ? 
C40 C39 C38 119.5(6) . . ? 
C41 C40 C39 119.8(6) . . ? 
C40 C41 C42 120.4(6) . . ? 
C37 C42 C41 120.7(6) . . ? 
C44 C43 C48 118.9(6) . . ? 
C44 C43 P1 119.8(5) . . ? 
C48 C43 P1 121.2(5) . . ? 
C43 C44 C45 120.8(7) . . ? 
C46 C45 C44 120.0(7) . . ? 
C47 C46 C45 120.0(7) . . ? 
C46 C47 C48 120.6(7) . . ? 
C47 C48 C43 119.6(7) . . ? 
C54 C49 C50 119.1(5) . . ? 
C54 C49 P2 122.2(5) . . ? 
C50 C49 P2 118.1(5) . . ? 
C51 C50 C49 120.5(6) . . ? 
C50 C51 C52 119.9(6) . . ? 
C53 C52 C51 119.0(6) . . ? 
C52 C53 C54 121.0(6) . . ? 
C49 C54 C53 120.5(6) . . ? 
C60 C55 C56 118.7(6) . . ? 
C60 C55 P2 119.4(5) . . ? 
C56 C55 P2 121.7(5) . . ? 
C57 C56 C55 119.4(6) . . ? 
C58 C57 C56 121.1(6) . . ? 
C59 C58 C57 119.6(6) . . ? 
C58 C59 C60 120.1(6) . . ? 
C59 C60 C55 121.1(6) . . ? 
C66 C61 C62 118.3(6) . . ? 
C66 C61 P3 117.4(5) . . ? 
C62 C61 P3 124.3(5) . . ? 
C63 C62 C61 120.9(7) . . ? 
C64 C63 C62 119.7(7) . . ? 
C63 C64 C65 121.2(7) . . ? 
C64 C65 C66 119.1(7) . . ? 
C61 C66 C65 120.7(6) . . ? 
C72 C67 C68 119.2(6) . . ? 
C72 C67 P3 120.3(5) . . ? 
C68 C67 P3 120.5(5) . . ? 
C69 C68 C67 119.1(7) . . ? 
C70 C69 C68 121.2(7) . . ? 
C69 C70 C71 120.4(7) . . ? 
C70 C71 C72 119.3(7) . . ? 
C67 C72 C71 120.8(7) . . ? 
C78 C73 C74 118.4(5) . . ? 
C78 C73 P4 118.0(5) . . ? 
C74 C73 P4 123.6(5) . . ? 
C75 C74 C73 119.9(6) . . ? 
C76 C75 C74 120.5(7) . . ? 
C75 C76 C77 120.9(6) . . ? 
C76 C77 C78 119.8(6) . . ? 
C77 C78 C73 120.3(6) . . ? 
C84 C79 C80 119.8(6) . . ? 
C84 C79 P4 118.6(5) . . ? 
C80 C79 P4 121.6(5) . . ? 
C81 C80 C79 119.3(7) . . ? 
C80 C81 C82 121.4(6) . . ? 
C81 C82 C83 118.9(6) . . ? 
C82 C83 C84 119.9(7) . . ? 
C79 C84 C83 120.6(6) . . ? 
C86 C85 C90 118.9(6) . . ? 
C86 C85 P5 122.5(5) . . ? 
C90 C85 P5 118.3(5) . . ? 
C85 C86 C87 121.2(7) . . ? 
C88 C87 C86 119.1(7) . . ? 
C89 C88 C87 120.4(7) . . ? 
C88 C89 C90 120.3(7) . . ? 
C89 C90 C85 120.0(7) . . ? 
C92 C91 C96 118.8(6) . . ? 
C92 C91 P5 119.2(5) . . ? 
C96 C91 P5 122.0(5) . . ? 
C93 C92 C91 120.0(6) . . ? 
C94 C93 C92 120.6(6) . . ? 
C95 C94 C93 120.0(7) . . ? 
C94 C95 C96 120.5(7) . . ? 
C95 C96 C91 120.1(6) . . ? 
C98 C97 C102 119.0(6) . . ? 
C98 C97 P6 123.9(5) . . ? 
C102 C97 P6 117.1(5) . . ? 
C99 C98 C97 120.0(7) . . ? 
C100 C99 C98 121.1(7) . . ? 
C101 C100 C99 120.1(7) . . ? 
C100 C101 C102 119.3(7) . . ? 
C97 C102 C101 120.5(6) . . ? 
C104 C103 C108 118.3(6) . . ? 
C104 C103 P6 121.6(5) . . ? 
C108 C103 P6 119.9(5) . . ? 
C103 C104 C105 120.0(7) . . ? 
C106 C105 C104 120.6(7) . . ? 
C105 C106 C107 120.5(7) . . ? 
C108 C107 C106 119.2(7) . . ? 
C107 C108 C103 121.5(6) . . ? 
F1 B1 F2 106.5(11) . . ? 
F1 B1 F4 112.0(11) . . ? 
F2 B1 F4 108.5(7) . . ? 
F1 B1 F3 112.5(9) . . ? 
F2 B1 F3 107.6(9) . . ? 
F4 B1 F3 109.5(7) . . ? 
F5A B2 F6 130.1(12) . . ? 
F5A B2 F5 69.1(12) . . ? 
F6 B2 F5 108.7(12) . . ? 
F5A B2 F7A 106.1(14) . . ? 
F6 B2 F7A 42.9(13) . . ? 
F5 B2 F7A 140.3(14) . . ? 
F5A B2 F7 35.0(12) . . ? 
F6 B2 F7 111.8(12) . . ? 
F5 B2 F7 103.2(12) . . ? 
F7A B2 F7 75.0(15) . . ? 
F5A B2 F6A 108.8(15) . . ? 
F6 B2 F6A 60.4(15) . . ? 
F5 B2 F6A 49.7(14) . . ? 
F7A B2 F6A 100.9(18) . . ? 
F7 B2 F6A 130.7(14) . . ? 
F5A B2 F8 117.1(10) . . ? 
F6 B2 F8 111.5(9) . . ? 
F5 B2 F8 105.4(8) . . ? 
F7A B2 F8 111.0(11) . . ? 
F7 B2 F8 115.6(11) . . ? 
F6A B2 F8 111.6(10) . . ? 
F6A F5 B2 65.9(12) . . ? 
F6A F5 F5A 110.2(15) . . ? 
B2 F5 F5A 55.0(9) . . ? 
F7A F6 B2 69.5(13) . . ? 
F7A F6 F6A 126(2) . . ? 
B2 F6 F6A 61.0(12) . . ? 
F5A F7 B2 70.7(15) . . ? 
F5A F7 F7A 117(2) . . ? 
B2 F7 F7A 52.2(10) . . ? 
Cl2 C1S Cl1 127.6(7) . . ? 
Cl3 C2S Cl4 98.6(7) . . ? 
Cl5 C3S Cl6 110.0(6) . . ? 
F7 F5A B2 74.3(18) . . ? 
F7 F5A F5 128(2) . . ? 
B2 F5A F5 55.9(9) . . ? 
F5 F6A F6 121.2(16) . . ? 
F5 F6A B2 64.5(12) . . ? 
F6 F6A B2 58.6(9) . . ? 
F6 F7A B2 67.6(13) . . ? 
F6 F7A F7 113.4(19) . . ? 
B2 F7A F7 52.8(9) . . ? 
  
loop_ 
 _geom_torsion_atom_site_label_1 
 _geom_torsion_atom_site_label_2 
 _geom_torsion_atom_site_label_3 
 _geom_torsion_atom_site_label_4 
 _geom_torsion 
 _geom_torsion_site_symmetry_1 
 _geom_torsion_site_symmetry_2 
 _geom_torsion_site_symmetry_3 
 _geom_torsion_site_symmetry_4 
 _geom_torsion_publ_flag 
P6 Pd1 Tl1 Pd2 107(2) . . . . ? 
P2 Pd1 Tl1 Pd2 -19(3) . . . . ? 
P4 Pd1 Tl1 Pd2 -137(2) . . . . ? 
P6 Pd1 Tl1 Au1 117.3(18) . . . . ? 
P2 Pd1 Tl1 Au1 -8(2) . . . . ? 
P4 Pd1 Tl1 Au1 -126.3(17) . . . . ? 
P6 Pd1 Tl1 Au2 108(11) . . . . ? 
P2 Pd1 Tl1 Au2 -17(11) . . . . ? 
P4 Pd1 Tl1 Au2 -135(12) . . . . ? 
P1 Pd2 Tl1 Pd1 116(2) . . . . ? 
P5 Pd2 Tl1 Pd1 -11(3) . . . . ? 
P3 Pd2 Tl1 Pd1 -130(2) . . . . ? 
P1 Pd2 Tl1 Au1 24(16) . . . . ? 
P5 Pd2 Tl1 Au1 -102(17) . . . . ? 
P3 Pd2 Tl1 Au1 138(17) . . . . ? 
P1 Pd2 Tl1 Au2 115.3(14) . . . . ? 
P5 Pd2 Tl1 Au2 -10.8(19) . . . . ? 
P3 Pd2 Tl1 Au2 -130.4(14) . . . . ? 
P3 Au1 Tl1 Pd1 -138.8(19) . . . . ? 
P5 Au1 Tl1 Pd1 -23(2) . . . . ? 
P1 Au1 Tl1 Pd1 106.3(19) . . . . ? 
P3 Au1 Tl1 Pd2 -40(16) . . . . ? 
P5 Au1 Tl1 Pd2 75(17) . . . . ? 
P1 Au1 Tl1 Pd2 -155(17) . . . . ? 
P3 Au1 Tl1 Au2 -137.2(9) . . . . ? 
P5 Au1 Tl1 Au2 -21.6(11) . . . . ? 
P1 Au1 Tl1 Au2 107.9(9) . . . . ? 
P4 Au2 Tl1 Pd1 43(11) . . . . ? 
P2 Au2 Tl1 Pd1 162(12) . . . . ? 
P6 Au2 Tl1 Pd1 -69(11) . . . . ? 
P4 Au2 Tl1 Pd2 -138.5(15) . . . . ? 
P2 Au2 Tl1 Pd2 -19.2(16) . . . . ? 
P6 Au2 Tl1 Pd2 110.1(15) . . . . ? 
P4 Au2 Tl1 Au1 -130.0(9) . . . . ? 
P2 Au2 Tl1 Au1 -10.7(11) . . . . ? 
P6 Au2 Tl1 Au1 118.6(9) . . . . ? 
P5 Pd2 P1 C37 -65.0(7) . . . . ? 
P3 Pd2 P1 C37 91.3(5) . . . . ? 
Tl1 Pd2 P1 C37 -169.0(3) . . . . ? 
P5 Pd2 P1 C43 177.6(5) . . . . ? 
P3 Pd2 P1 C43 -26.1(6) . . . . ? 
Tl1 Pd2 P1 C43 73.6(5) . . . . ? 
P5 Pd2 P1 C1 50.8(7) . . . . ? 
P3 Pd2 P1 C1 -152.9(4) . . . . ? 
Tl1 Pd2 P1 C1 -53.2(6) . . . . ? 
P5 Pd2 P1 Au1 -3(27) . . . . ? 
P3 Pd2 P1 Au1 153(28) . . . . ? 
Tl1 Pd2 P1 Au1 -107(28) . . . . ? 
P3 Au1 P1 C37 92.3(3) . . . . ? 
P5 Au1 P1 C37 -64.8(4) . . . . ? 
Tl1 Au1 P1 C37 -169.6(2) . . . . ? 
P3 Au1 P1 C43 -25.4(4) . . . . ? 
P5 Au1 P1 C43 177.5(3) . . . . ? 
Tl1 Au1 P1 C43 72.7(3) . . . . ? 
P3 Au1 P1 C1 -152.7(3) . . . . ? 
P5 Au1 P1 C1 50.2(4) . . . . ? 
Tl1 Au1 P1 C1 -54.6(4) . . . . ? 
P3 Au1 P1 Pd2 -26(27) . . . . ? 
P5 Au1 P1 Pd2 176(100) . . . . ? 
Tl1 Au1 P1 Pd2 72(27) . . . . ? 
P6 Pd1 P2 C55 -46.7(7) . . . . ? 
P4 Pd1 P2 C55 159.2(4) . . . . ? 
Tl1 Pd1 P2 C55 59.4(6) . . . . ? 
P6 Pd1 P2 C10 -172.1(5) . . . . ? 
P4 Pd1 P2 C10 33.8(6) . . . . ? 
Tl1 Pd1 P2 C10 -66.1(5) . . . . ? 
P6 Pd1 P2 C49 73.3(7) . . . . ? 
P4 Pd1 P2 C49 -80.7(6) . . . . ? 
Tl1 Pd1 P2 C49 179.4(3) . . . . ? 
P6 Pd1 P2 Au2 -10(32) . . . . ? 
P4 Pd1 P2 Au2 -164(33) . . . . ? 
Tl1 Pd1 P2 Au2 96(32) . . . . ? 
P4 Au2 P2 C55 159.2(3) . . . . ? 
P6 Au2 P2 C55 -46.7(4) . . . . ? 
Tl1 Au2 P2 C55 60.6(3) . . . . ? 
P4 Au2 P2 C10 33.5(4) . . . . ? 
P6 Au2 P2 C10 -172.3(3) . . . . ? 
Tl1 Au2 P2 C10 -65.1(3) . . . . ? 
P4 Au2 P2 C49 -81.4(3) . . . . ? 
P6 Au2 P2 C49 72.8(4) . . . . ? 
Tl1 Au2 P2 C49 180.0(2) . . . . ? 
P4 Au2 P2 Pd1 15(32) . . . . ? 
P6 Au2 P2 Pd1 169(100) . . . . ? 
Tl1 Au2 P2 Pd1 -83(32) . . . . ? 
P5 Au1 P3 C67 -33.1(4) . . . . ? 
P1 Au1 P3 C67 166.7(3) . . . . ? 
Tl1 Au1 P3 C67 68.1(4) . . . . ? 
P5 Au1 P3 C61 87.6(3) . . . . ? 
P1 Au1 P3 C61 -72.6(3) . . . . ? 
Tl1 Au1 P3 C61 -171.2(2) . . . . ? 
P5 Au1 P3 C13 -157.1(3) . . . . ? 
P1 Au1 P3 C13 42.6(4) . . . . ? 
Tl1 Au1 P3 C13 -56.0(3) . . . . ? 
P5 Au1 P3 Pd2 -36(17) . . . . ? 
P1 Au1 P3 Pd2 164(18) . . . . ? 
Tl1 Au1 P3 Pd2 65(17) . . . . ? 
P1 Pd2 P3 C67 167.3(4) . . . . ? 
P5 Pd2 P3 C67 -34.6(7) . . . . ? 
Tl1 Pd2 P3 C67 69.4(6) . . . . ? 
P1 Pd2 P3 C61 -72.4(6) . . . . ? 
P5 Pd2 P3 C61 85.6(6) . . . . ? 
Tl1 Pd2 P3 C61 -170.3(3) . . . . ? 
P1 Pd2 P3 C13 43.9(6) . . . . ? 
P5 Pd2 P3 C13 -158.1(4) . . . . ? 
Tl1 Pd2 P3 C13 -54.0(5) . . . . ? 
P1 Pd2 P3 Au1 -15(17) . . . . ? 
P5 Pd2 P3 Au1 143(18) . . . . ? 
Tl1 Pd2 P3 Au1 -113(17) . . . . ? 
P2 Au2 P4 C73 84.8(3) . . . . ? 
P6 Au2 P4 C73 -73.1(3) . . . . ? 
Tl1 Au2 P4 C73 -170.8(2) . . . . ? 
P2 Au2 P4 C79 -34.3(4) . . . . ? 
P6 Au2 P4 C79 167.8(3) . . . . ? 
Tl1 Au2 P4 C79 70.1(3) . . . . ? 
P2 Au2 P4 C22 -158.6(3) . . . . ? 
P6 Au2 P4 C22 43.5(3) . . . . ? 
Tl1 Au2 P4 C22 -54.2(3) . . . . ? 
P2 Au2 P4 Pd1 -174(13) . . . . ? 
P6 Au2 P4 Pd1 29(12) . . . . ? 
Tl1 Au2 P4 Pd1 -69(12) . . . . ? 
P6 Pd1 P4 C73 -70.8(6) . . . . ? 
P2 Pd1 P4 C73 85.1(6) . . . . ? 
Tl1 Pd1 P4 C73 -171.9(3) . . . . ? 
P6 Pd1 P4 C79 168.4(4) . . . . ? 
P2 Pd1 P4 C79 -35.6(7) . . . . ? 
Tl1 Pd1 P4 C79 67.4(5) . . . . ? 
P6 Pd1 P4 C22 44.8(6) . . . . ? 
P2 Pd1 P4 C22 -159.2(4) . . . . ? 
Tl1 Pd1 P4 C22 -56.2(5) . . . . ? 
P6 Pd1 P4 Au2 -150(13) . . . . ? 
P2 Pd1 P4 Au2 6(12) . . . . ? 
Tl1 Pd1 P4 Au2 109(13) . . . . ? 
P1 Pd2 P5 C91 -52.0(7) . . . . ? 
P3 Pd2 P5 C91 152.6(4) . . . . ? 
Tl1 Pd2 P5 C91 49.7(6) . . . . ? 
P1 Pd2 P5 C85 72.2(7) . . . . ? 
P3 Pd2 P5 C85 -83.2(6) . . . . ? 
Tl1 Pd2 P5 C85 173.9(3) . . . . ? 
P1 Pd2 P5 C25 -172.7(5) . . . . ? 
P3 Pd2 P5 C25 31.9(6) . . . . ? 
Tl1 Pd2 P5 C25 -71.0(5) . . . . ? 
P1 Pd2 P5 Au1 1(11) . . . . ? 
P3 Pd2 P5 Au1 -154(12) . . . . ? 
Tl1 Pd2 P5 Au1 103(12) . . . . ? 
P3 Au1 P5 C91 152.2(3) . . . . ? 
P1 Au1 P5 C91 -50.8(4) . . . . ? 
Tl1 Au1 P5 C91 53.0(3) . . . . ? 
P3 Au1 P5 C85 -85.5(3) . . . . ? 
P1 Au1 P5 C85 71.5(4) . . . . ? 
Tl1 Au1 P5 C85 175.3(2) . . . . ? 
P3 Au1 P5 C25 30.5(4) . . . . ? 
P1 Au1 P5 C25 -172.5(3) . . . . ? 
Tl1 Au1 P5 C25 -68.8(3) . . . . ? 
P3 Au1 P5 Pd2 25(12) . . . . ? 
P1 Au1 P5 Pd2 -178(100) . . . . ? 
Tl1 Au1 P5 Pd2 -75(12) . . . . ? 
P2 Pd1 P6 C103 177.8(5) . . . . ? 
P4 Pd1 P6 C103 -27.7(6) . . . . ? 
Tl1 Pd1 P6 C103 71.0(5) . . . . ? 
P2 Pd1 P6 C97 -65.1(7) . . . . ? 
P4 Pd1 P6 C97 89.3(5) . . . . ? 
Tl1 Pd1 P6 C97 -172.0(3) . . . . ? 
P2 Pd1 P6 C34 54.6(7) . . . . ? 
P4 Pd1 P6 C34 -151.0(4) . . . . ? 
Tl1 Pd1 P6 C34 -52.3(5) . . . . ? 
P2 Pd1 P6 Au2 3(9) . . . . ? 
P4 Pd1 P6 Au2 157(10) . . . . ? 
Tl1 Pd1 P6 Au2 -104(10) . . . . ? 
P4 Au2 P6 C103 -26.3(4) . . . . ? 
P2 Au2 P6 C103 178.0(3) . . . . ? 
Tl1 Au2 P6 C103 68.3(3) . . . . ? 
P4 Au2 P6 C97 91.8(3) . . . . ? 
P2 Au2 P6 C97 -63.8(4) . . . . ? 
Tl1 Au2 P6 C97 -173.6(2) . . . . ? 
P4 Au2 P6 C34 -150.7(3) . . . . ? 
P2 Au2 P6 C34 53.7(4) . . . . ? 
Tl1 Au2 P6 C34 -56.1(3) . . . . ? 
P4 Au2 P6 Pd1 -21(9) . . . . ? 
P2 Au2 P6 Pd1 -177(100) . . . . ? 
Tl1 Au2 P6 Pd1 74(9) . . . . ? 
C5 N1 C1 C2 3.3(9) . . . . ? 
C5 N1 C1 P1 -175.2(4) . . . . ? 
C37 P1 C1 N1 141.0(5) . . . . ? 
C43 P1 C1 N1 -111.2(5) . . . . ? 
Pd2 P1 C1 N1 22.2(7) . . . . ? 
Au1 P1 C1 N1 23.1(6) . . . . ? 
C37 P1 C1 C2 -37.5(6) . . . . ? 
C43 P1 C1 C2 70.2(5) . . . . ? 
Pd2 P1 C1 C2 -156.4(6) . . . . ? 
Au1 P1 C1 C2 -155.5(5) . . . . ? 
N1 C1 C2 C3 -1.4(9) . . . . ? 
P1 C1 C2 C3 177.0(5) . . . . ? 
C1 C2 C3 C4 -2.5(9) . . . . ? 
C2 C3 C4 C5 4.2(9) . . . . ? 
C2 C3 C4 C11 -173.7(6) . . . . ? 
C1 N1 C5 C4 -1.3(8) . . . . ? 
C1 N1 C5 C6 176.0(5) . . . . ? 
C3 C4 C5 N1 -2.4(9) . . . . ? 
C11 C4 C5 N1 175.6(5) . . . . ? 
C3 C4 C5 C6 -179.7(5) . . . . ? 
C11 C4 C5 C6 -1.7(9) . . . . ? 
C10 N2 C6 C7 2.9(8) . . . . ? 
C10 N2 C6 C5 -178.8(5) . . . . ? 
N1 C5 C6 N2 10.2(8) . . . . ? 
C4 C5 C6 N2 -172.5(5) . . . . ? 
N1 C5 C6 C7 -171.5(5) . . . . ? 
C4 C5 C6 C7 5.8(8) . . . . ? 
N2 C6 C7 C8 -5.5(9) . . . . ? 
C5 C6 C7 C8 176.2(6) . . . . ? 
N2 C6 C7 C12 173.3(6) . . . . ? 
C5 C6 C7 C12 -5.0(9) . . . . ? 
C6 C7 C8 C9 4.4(9) . . . . ? 
C12 C7 C8 C9 -174.3(6) . . . . ? 
C7 C8 C9 C10 -1.1(9) . . . . ? 
C6 N2 C10 C9 0.7(9) . . . . ? 
C6 N2 C10 P2 -177.2(4) . . . . ? 
C8 C9 C10 N2 -1.6(10) . . . . ? 
C8 C9 C10 P2 176.1(5) . . . . ? 
C55 P2 C10 N2 -99.2(5) . . . . ? 
C49 P2 C10 N2 153.2(4) . . . . ? 
Pd1 P2 C10 N2 36.3(6) . . . . ? 
Au2 P2 C10 N2 36.0(5) . . . . ? 
C55 P2 C10 C9 82.9(6) . . . . ? 
C49 P2 C10 C9 -24.8(6) . . . . ? 
Pd1 P2 C10 C9 -141.6(6) . . . . ? 
Au2 P2 C10 C9 -141.9(5) . . . . ? 
C5 C4 C11 C12 -3.5(9) . . . . ? 
C3 C4 C11 C12 174.4(6) . . . . ? 
C4 C11 C12 C7 4.4(10) . . . . ? 
C8 C7 C12 C11 178.6(6) . . . . ? 
C6 C7 C12 C11 -0.1(10) . . . . ? 
C17 N3 C13 C14 3.1(8) . . . . ? 
C17 N3 C13 P3 -178.0(4) . . . . ? 
C67 P3 C13 N3 -100.1(5) . . . . ? 
C61 P3 C13 N3 153.5(4) . . . . ? 
Au1 P3 C13 N3 35.0(5) . . . . ? 
Pd2 P3 C13 N3 33.6(6) . . . . ? 
C67 P3 C13 C14 78.8(5) . . . . ? 
C61 P3 C13 C14 -27.6(6) . . . . ? 
Au1 P3 C13 C14 -146.1(5) . . . . ? 
Pd2 P3 C13 C14 -147.5(6) . . . . ? 
N3 C13 C14 C15 -3.0(9) . . . . ? 
P3 C13 C14 C15 178.2(5) . . . . ? 
C13 C14 C15 C16 0.0(9) . . . . ? 
C14 C15 C16 C17 2.5(9) . . . . ? 
C14 C15 C16 C23 -177.2(6) . . . . ? 
C13 N3 C17 C16 -0.4(8) . . . . ? 
C13 N3 C17 C18 179.4(5) . . . . ? 
C15 C16 C17 N3 -2.4(8) . . . . ? 
C23 C16 C17 N3 177.3(5) . . . . ? 
C15 C16 C17 C18 177.8(5) . . . . ? 
C23 C16 C17 C18 -2.5(8) . . . . ? 
C22 N4 C18 C19 -3.4(8) . . . . ? 
C22 N4 C18 C17 178.2(5) . . . . ? 
N3 C17 C18 N4 2.3(8) . . . . ? 
C16 C17 C18 N4 -177.9(5) . . . . ? 
N3 C17 C18 C19 -176.1(5) . . . . ? 
C16 C17 C18 C19 3.7(8) . . . . ? 
N4 C18 C19 C20 2.2(9) . . . . ? 
C17 C18 C19 C20 -179.5(5) . . . . ? 
N4 C18 C19 C24 179.3(5) . . . . ? 
C17 C18 C19 C24 -2.3(8) . . . . ? 
C18 C19 C20 C21 0.0(9) . . . . ? 
C24 C19 C20 C21 -177.2(6) . . . . ? 
C19 C20 C21 C22 -0.8(10) . . . . ? 
C18 N4 C22 C21 2.6(8) . . . . ? 
C18 N4 C22 P4 179.8(4) . . . . ? 
C20 C21 C22 N4 -0.5(10) . . . . ? 
C20 C21 C22 P4 -177.6(5) . . . . ? 
C73 P4 C22 N4 156.2(4) . . . . ? 
C79 P4 C22 N4 -98.0(5) . . . . ? 
Au2 P4 C22 N4 37.5(5) . . . . ? 
Pd1 P4 C22 N4 38.0(6) . . . . ? 
C73 P4 C22 C21 -26.5(6) . . . . ? 
C79 P4 C22 C21 79.2(5) . . . . ? 
Au2 P4 C22 C21 -145.3(5) . . . . ? 
Pd1 P4 C22 C21 -144.7(6) . . . . ? 
C15 C16 C23 C24 179.4(6) . . . . ? 
C17 C16 C23 C24 -0.3(9) . . . . ? 
C16 C23 C24 C19 1.8(9) . . . . ? 
C20 C19 C24 C23 176.7(6) . . . . ? 
C18 C19 C24 C23 -0.4(9) . . . . ? 
C29 N5 C25 C26 1.7(9) . . . . ? 
C29 N5 C25 P5 178.9(4) . . . . ? 
C91 P5 C25 N5 -86.7(5) . . . . ? 
C85 P5 C25 N5 164.7(4) . . . . ? 
Pd2 P5 C25 N5 46.0(6) . . . . ? 
Au1 P5 C25 N5 45.7(5) . . . . ? 
C91 P5 C25 C26 90.4(6) . . . . ? 
C85 P5 C25 C26 -18.3(7) . . . . ? 
Pd2 P5 C25 C26 -136.9(6) . . . . ? 
Au1 P5 C25 C26 -137.2(6) . . . . ? 
N5 C25 C26 C27 -2.2(11) . . . . ? 
P5 C25 C26 C27 -179.0(6) . . . . ? 
C25 C26 C27 C28 0.3(11) . . . . ? 
C26 C27 C28 C29 2.0(10) . . . . ? 
C26 C27 C28 C35 -179.6(7) . . . . ? 
C25 N5 C29 C28 0.7(9) . . . . ? 
C25 N5 C29 C30 179.3(5) . . . . ? 
C27 C28 C29 N5 -2.5(10) . . . . ? 
C35 C28 C29 N5 179.0(6) . . . . ? 
C27 C28 C29 C30 178.9(6) . . . . ? 
C35 C28 C29 C30 0.4(10) . . . . ? 
C34 N6 C30 C31 0.4(9) . . . . ? 
C34 N6 C30 C29 176.1(5) . . . . ? 
N5 C29 C30 N6 6.4(9) . . . . ? 
C28 C29 C30 N6 -175.0(6) . . . . ? 
N5 C29 C30 C31 -177.8(6) . . . . ? 
C28 C29 C30 C31 0.8(9) . . . . ? 
N6 C30 C31 C32 -4.4(9) . . . . ? 
C29 C30 C31 C32 179.9(6) . . . . ? 
N6 C30 C31 C36 175.6(6) . . . . ? 
C29 C30 C31 C36 -0.2(9) . . . . ? 
C36 C31 C32 C33 -175.7(6) . . . . ? 
C30 C31 C32 C33 4.2(10) . . . . ? 
C31 C32 C33 C34 -0.3(10) . . . . ? 
C30 N6 C34 C33 3.8(9) . . . . ? 
C30 N6 C34 P6 -175.2(4) . . . . ? 
C32 C33 C34 N6 -4.0(10) . . . . ? 
C32 C33 C34 P6 175.0(5) . . . . ? 
C103 P6 C34 N6 -105.7(5) . . . . ? 
C97 P6 C34 N6 146.8(5) . . . . ? 
Pd1 P6 C34 N6 23.1(6) . . . . ? 
Au2 P6 C34 N6 25.5(6) . . . . ? 
C103 P6 C34 C33 75.2(6) . . . . ? 
C97 P6 C34 C33 -32.3(6) . . . . ? 
Pd1 P6 C34 C33 -156.0(6) . . . . ? 
Au2 P6 C34 C33 -153.5(5) . . . . ? 
C27 C28 C35 C36 179.2(7) . . . . ? 
C29 C28 C35 C36 -2.4(10) . . . . ? 
C28 C35 C36 C31 3.1(11) . . . . ? 
C32 C31 C36 C35 178.1(7) . . . . ? 
C30 C31 C36 C35 -1.8(10) . . . . ? 
C43 P1 C37 C42 -12.3(6) . . . . ? 
C1 P1 C37 C42 94.5(6) . . . . ? 
Pd2 P1 C37 C42 -138.3(7) . . . . ? 
Au1 P1 C37 C42 -139.2(5) . . . . ? 
C43 P1 C37 C38 169.0(5) . . . . ? 
C1 P1 C37 C38 -84.2(5) . . . . ? 
Pd2 P1 C37 C38 43.0(7) . . . . ? 
Au1 P1 C37 C38 42.1(6) . . . . ? 
C42 C37 C38 C39 0.5(9) . . . . ? 
P1 C37 C38 C39 179.3(5) . . . . ? 
C37 C38 C39 C40 -0.3(10) . . . . ? 
C38 C39 C40 C41 0.8(10) . . . . ? 
C39 C40 C41 C42 -1.3(11) . . . . ? 
C38 C37 C42 C41 -1.0(10) . . . . ? 
P1 C37 C42 C41 -179.8(5) . . . . ? 
C40 C41 C42 C37 1.5(11) . . . . ? 
C37 P1 C43 C44 -60.6(5) . . . . ? 
C1 P1 C43 C44 -166.6(5) . . . . ? 
Pd2 P1 C43 C44 58.8(6) . . . . ? 
Au1 P1 C43 C44 58.7(6) . . . . ? 
C37 P1 C43 C48 122.5(5) . . . . ? 
C1 P1 C43 C48 16.6(5) . . . . ? 
Pd2 P1 C43 C48 -118.1(6) . . . . ? 
Au1 P1 C43 C48 -118.1(5) . . . . ? 
C48 C43 C44 C45 0.5(9) . . . . ? 
P1 C43 C44 C45 -176.4(5) . . . . ? 
C43 C44 C45 C46 -0.8(10) . . . . ? 
C44 C45 C46 C47 0.6(11) . . . . ? 
C45 C46 C47 C48 -0.1(11) . . . . ? 
C46 C47 C48 C43 -0.1(10) . . . . ? 
C44 C43 C48 C47 0.0(9) . . . . ? 
P1 C43 C48 C47 176.8(5) . . . . ? 
C55 P2 C49 C54 18.1(6) . . . . ? 
C10 P2 C49 C54 126.9(5) . . . . ? 
Pd1 P2 C49 C54 -114.2(6) . . . . ? 
Au2 P2 C49 C54 -113.3(5) . . . . ? 
C55 P2 C49 C50 -171.0(5) . . . . ? 
C10 P2 C49 C50 -62.2(5) . . . . ? 
Pd1 P2 C49 C50 56.7(6) . . . . ? 
Au2 P2 C49 C50 57.6(5) . . . . ? 
C54 C49 C50 C51 -1.2(10) . . . . ? 
P2 C49 C50 C51 -172.4(5) . . . . ? 
C49 C50 C51 C52 0.4(10) . . . . ? 
C50 C51 C52 C53 0.0(11) . . . . ? 
C51 C52 C53 C54 0.4(10) . . . . ? 
C50 C49 C54 C53 1.6(10) . . . . ? 
P2 C49 C54 C53 172.4(5) . . . . ? 
C52 C53 C54 C49 -1.2(10) . . . . ? 
C10 P2 C55 C60 133.4(5) . . . . ? 
C49 P2 C55 C60 -117.7(5) . . . . ? 
Pd1 P2 C55 C60 4.9(7) . . . . ? 
Au2 P2 C55 C60 4.3(6) . . . . ? 
C10 P2 C55 C56 -50.1(5) . . . . ? 
C49 P2 C55 C56 58.9(5) . . . . ? 
Pd1 P2 C55 C56 -178.5(5) . . . . ? 
Au2 P2 C55 C56 -179.1(4) . . . . ? 
C60 C55 C56 C57 1.9(8) . . . . ? 
P2 C55 C56 C57 -174.7(4) . . . . ? 
C55 C56 C57 C58 -1.3(9) . . . . ? 
C56 C57 C58 C59 0.4(9) . . . . ? 
C57 C58 C59 C60 -0.1(9) . . . . ? 
C58 C59 C60 C55 0.8(10) . . . . ? 
C56 C55 C60 C59 -1.6(9) . . . . ? 
P2 C55 C60 C59 175.0(5) . . . . ? 
C67 P3 C61 C66 152.0(5) . . . . ? 
C13 P3 C61 C66 -101.6(5) . . . . ? 
Au1 P3 C61 C66 19.0(6) . . . . ? 
Pd2 P3 C61 C66 20.5(7) . . . . ? 
C67 P3 C61 C62 -28.7(6) . . . . ? 
C13 P3 C61 C62 77.7(6) . . . . ? 
Au1 P3 C61 C62 -161.6(6) . . . . ? 
Pd2 P3 C61 C62 -160.2(7) . . . . ? 
C66 C61 C62 C63 0.1(10) . . . . ? 
P3 C61 C62 C63 -179.2(6) . . . . ? 
C61 C62 C63 C64 0.8(12) . . . . ? 
C62 C63 C64 C65 -1.3(12) . . . . ? 
C63 C64 C65 C66 0.8(12) . . . . ? 
C62 C61 C66 C65 -0.6(10) . . . . ? 
P3 C61 C66 C65 178.8(5) . . . . ? 
C64 C65 C66 C61 0.2(11) . . . . ? 
C61 P3 C67 C72 -52.8(6) . . . . ? 
C13 P3 C67 C72 -160.5(5) . . . . ? 
Au1 P3 C67 C72 71.0(6) . . . . ? 
Pd2 P3 C67 C72 71.1(7) . . . . ? 
C61 P3 C67 C68 130.3(5) . . . . ? 
C13 P3 C67 C68 22.7(6) . . . . ? 
Au1 P3 C67 C68 -105.9(5) . . . . ? 
Pd2 P3 C67 C68 -105.8(6) . . . . ? 
C72 C67 C68 C69 0.1(10) . . . . ? 
P3 C67 C68 C69 177.0(5) . . . . ? 
C67 C68 C69 C70 1.6(11) . . . . ? 
C68 C69 C70 C71 -1.8(12) . . . . ? 
C69 C70 C71 C72 0.2(12) . . . . ? 
C68 C67 C72 C71 -1.5(10) . . . . ? 
P3 C67 C72 C71 -178.4(6) . . . . ? 
C70 C71 C72 C67 1.4(11) . . . . ? 
C79 P4 C73 C78 148.6(5) . . . . ? 
C22 P4 C73 C78 -106.4(5) . . . . ? 
Au2 P4 C73 C78 16.6(6) . . . . ? 
Pd1 P4 C73 C78 14.5(7) . . . . ? 
C79 P4 C73 C74 -31.7(6) . . . . ? 
C22 P4 C73 C74 73.3(6) . . . . ? 
Au2 P4 C73 C74 -163.7(5) . . . . ? 
Pd1 P4 C73 C74 -165.8(6) . . . . ? 
C78 C73 C74 C75 4.6(10) . . . . ? 
P4 C73 C74 C75 -175.1(5) . . . . ? 
C73 C74 C75 C76 -1.9(10) . . . . ? 
C74 C75 C76 C77 -1.2(11) . . . . ? 
C75 C76 C77 C78 1.6(11) . . . . ? 
C76 C77 C78 C73 1.2(10) . . . . ? 
C74 C73 C78 C77 -4.2(9) . . . . ? 
P4 C73 C78 C77 175.5(5) . . . . ? 
C73 P4 C79 C84 -58.1(6) . . . . ? 
C22 P4 C79 C84 -165.8(5) . . . . ? 
Au2 P4 C79 C84 64.0(6) . . . . ? 
Pd1 P4 C79 C84 65.6(7) . . . . ? 
C73 P4 C79 C80 122.7(5) . . . . ? 
C22 P4 C79 C80 15.0(6) . . . . ? 
Au2 P4 C79 C80 -115.2(5) . . . . ? 
Pd1 P4 C79 C80 -113.6(6) . . . . ? 
C84 C79 C80 C81 0.1(9) . . . . ? 
P4 C79 C80 C81 179.3(5) . . . . ? 
C79 C80 C81 C82 -0.1(10) . . . . ? 
C80 C81 C82 C83 0.4(10) . . . . ? 
C81 C82 C83 C84 -0.7(9) . . . . ? 
C80 C79 C84 C83 -0.4(9) . . . . ? 
P4 C79 C84 C83 -179.6(5) . . . . ? 
C82 C83 C84 C79 0.7(9) . . . . ? 
C91 P5 C85 C86 7.1(6) . . . . ? 
C25 P5 C85 C86 114.3(5) . . . . ? 
Pd2 P5 C85 C86 -127.4(6) . . . . ? 
Au1 P5 C85 C86 -125.1(5) . . . . ? 
C91 P5 C85 C90 -179.3(5) . . . . ? 
C25 P5 C85 C90 -72.0(5) . . . . ? 
Pd2 P5 C85 C90 46.2(6) . . . . ? 
Au1 P5 C85 C90 48.5(5) . . . . ? 
C90 C85 C86 C87 1.4(10) . . . . ? 
P5 C85 C86 C87 175.0(5) . . . . ? 
C85 C86 C87 C88 -0.4(11) . . . . ? 
C86 C87 C88 C89 0.2(11) . . . . ? 
C87 C88 C89 C90 -1.2(11) . . . . ? 
C88 C89 C90 C85 2.2(10) . . . . ? 
C86 C85 C90 C89 -2.3(9) . . . . ? 
P5 C85 C90 C89 -176.1(5) . . . . ? 
C85 P5 C91 C92 -103.1(5) . . . . ? 
C25 P5 C91 C92 147.9(5) . . . . ? 
Pd2 P5 C91 C92 23.8(7) . . . . ? 
Au1 P5 C91 C92 21.7(6) . . . . ? 
C85 P5 C91 C96 75.8(5) . . . . ? 
C25 P5 C91 C96 -33.1(6) . . . . ? 
Pd2 P5 C91 C96 -157.2(6) . . . . ? 
Au1 P5 C91 C96 -159.4(4) . . . . ? 
C96 C91 C92 C93 0.0(9) . . . . ? 
P5 C91 C92 C93 179.0(5) . . . . ? 
C91 C92 C93 C94 1.4(10) . . . . ? 
C92 C93 C94 C95 -3.1(10) . . . . ? 
C93 C94 C95 C96 3.4(10) . . . . ? 
C94 C95 C96 C91 -2.0(9) . . . . ? 
C92 C91 C96 C95 0.3(9) . . . . ? 
P5 C91 C96 C95 -178.7(5) . . . . ? 
C103 P6 C97 C98 -18.9(6) . . . . ? 
C34 P6 C97 C98 88.2(6) . . . . ? 
Pd1 P6 C97 C98 -142.7(6) . . . . ? 
Au2 P6 C97 C98 -145.4(6) . . . . ? 
C103 P6 C97 C102 161.4(5) . . . . ? 
C34 P6 C97 C102 -91.5(5) . . . . ? 
Pd1 P6 C97 C102 37.7(7) . . . . ? 
Au2 P6 C97 C102 34.9(6) . . . . ? 
C102 C97 C98 C99 0.5(11) . . . . ? 
P6 C97 C98 C99 -179.2(6) . . . . ? 
C97 C98 C99 C100 -0.6(12) . . . . ? 
C98 C99 C100 C101 -0.2(13) . . . . ? 
C99 C100 C101 C102 0.9(12) . . . . ? 
C98 C97 C102 C101 0.3(10) . . . . ? 
P6 C97 C102 C101 180.0(5) . . . . ? 
C100 C101 C102 C97 -1.0(11) . . . . ? 
C97 P6 C103 C104 131.3(5) . . . . ? 
C34 P6 C103 C104 24.3(6) . . . . ? 
Pd1 P6 C103 C104 -107.4(6) . . . . ? 
Au2 P6 C103 C104 -107.1(5) . . . . ? 
C97 P6 C103 C108 -55.0(5) . . . . ? 
C34 P6 C103 C108 -162.0(5) . . . . ? 
Pd1 P6 C103 C108 66.3(6) . . . . ? 
Au2 P6 C103 C108 66.6(6) . . . . ? 
C108 C103 C104 C105 0.1(9) . . . . ? 
P6 C103 C104 C105 173.8(5) . . . . ? 
C103 C104 C105 C106 0.4(10) . . . . ? 
C104 C105 C106 C107 0.6(11) . . . . ? 
C105 C106 C107 C108 -2.2(10) . . . . ? 
C106 C107 C108 C103 2.7(10) . . . . ? 
C104 C103 C108 C107 -1.7(9) . . . . ? 
P6 C103 C108 C107 -175.5(5) . . . . ? 
F5A B2 F5 F6A -140.9(16) . . . . ? 
F6 B2 F5 F6A -14.1(16) . . . . ? 
F7A B2 F5 F6A -51(3) . . . . ? 
F7 B2 F5 F6A -132.9(17) . . . . ? 
F8 B2 F5 F6A 105.5(14) . . . . ? 
F6 B2 F5 F5A 126.8(13) . . . . ? 
F7A B2 F5 F5A 90(2) . . . . ? 
F7 B2 F5 F5A 8.0(16) . . . . ? 
F6A B2 F5 F5A 140.9(16) . . . . ? 
F8 B2 F5 F5A -113.7(10) . . . . ? 
F5A B2 F6 F7A -68(3) . . . . ? 
F5 B2 F6 F7A -146.1(19) . . . . ? 
F7 B2 F6 F7A -33(2) . . . . ? 
F6A B2 F6 F7A -158(2) . . . . ? 
F8 B2 F6 F7A 98.2(19) . . . . ? 
F5A B2 F6 F6A 90.4(19) . . . . ? 
F5 B2 F6 F6A 12.3(14) . . . . ? 
F7A B2 F6 F6A 158(2) . . . . ? 
F7 B2 F6 F6A 125.6(15) . . . . ? 
F8 B2 F6 F6A -103.4(12) . . . . ? 
F6 B2 F7 F5A -130(3) . . . . ? 
F5 B2 F7 F5A -13(3) . . . . ? 
F7A B2 F7 F5A -152(3) . . . . ? 
F6A B2 F7 F5A -61(4) . . . . ? 
F8 B2 F7 F5A 101(3) . . . . ? 
F5A B2 F7 F7A 152(3) . . . . ? 
F6 B2 F7 F7A 22.5(18) . . . . ? 
F5 B2 F7 F7A 139.1(15) . . . . ? 
F6A B2 F7 F7A 92(2) . . . . ? 
F8 B2 F7 F7A -106.4(15) . . . . ? 
F7A F7 F5A B2 -24(2) . . . . ? 
B2 F7 F5A F5 15(3) . . . . ? 
F7A F7 F5A F5 -10(5) . . . . ? 
F6 B2 F5A F7 69(3) . . . . ? 
F5 B2 F5A F7 166(3) . . . . ? 
F7A B2 F5A F7 28(3) . . . . ? 
F6A B2 F5A F7 136(3) . . . . ? 
F8 B2 F5A F7 -97(3) . . . . ? 
F6 B2 F5A F5 -97.3(17) . . . . ? 
F7A B2 F5A F5 -138.4(16) . . . . ? 
F7 B2 F5A F5 -166(3) . . . . ? 
F6A B2 F5A F5 -30.5(15) . . . . ? 
F8 B2 F5A F5 97.1(10) . . . . ? 
F6A F5 F5A F7 21(4) . . . . ? 
B2 F5 F5A F7 -17(3) . . . . ? 
F6A F5 F5A B2 37.8(15) . . . . ? 
B2 F5 F6A F6 15.4(17) . . . . ? 
F5A F5 F6A F6 -18(3) . . . . ? 
F5A F5 F6A B2 -33.4(12) . . . . ? 
F7A F6 F6A F5 9(4) . . . . ? 
B2 F6 F6A F5 -16.3(19) . . . . ? 
F7A F6 F6A B2 25(3) . . . . ? 
F5A B2 F6A F5 38.5(17) . . . . ? 
F6 B2 F6A F5 164.6(18) . . . . ? 
F7A B2 F6A F5 149.9(15) . . . . ? 
F7 B2 F6A F5 70(2) . . . . ? 
F8 B2 F6A F5 -92.2(13) . . . . ? 
F5A B2 F6A F6 -126.1(14) . . . . ? 
F5 B2 F6A F6 -164.6(18) . . . . ? 
F7A B2 F6A F6 -14.7(15) . . . . ? 
F7 B2 F6A F6 -94(2) . . . . ? 
F8 B2 F6A F6 103.2(12) . . . . ? 
F6A F6 F7A B2 -23(2) . . . . ? 
B2 F6 F7A F7 27.0(17) . . . . ? 
F6A F6 F7A F7 3(4) . . . . ? 
F5A B2 F7A F6 132(2) . . . . ? 
F5 B2 F7A F6 56(3) . . . . ? 
F7 B2 F7A F6 149(2) . . . . ? 
F6A B2 F7A F6 19(2) . . . . ? 
F8 B2 F7A F6 -99(2) . . . . ? 
F5A B2 F7A F7 -16.1(18) . . . . ? 
F6 B2 F7A F7 -149(2) . . . . ? 
F5 B2 F7A F7 -93(2) . . . . ? 
F6A B2 F7A F7 -129.5(15) . . . . ? 
F8 B2 F7A F7 112.1(13) . . . . ? 
F5A F7 F7A F6 -2(4) . . . . ? 
B2 F7 F7A F6 -32(2) . . . . ? 
F5A F7 F7A B2 30(3) . . . . ? 
  
_diffrn_measured_fraction_theta_max    0.999 
_diffrn_reflns_theta_full              27.48 
_diffrn_measured_fraction_theta_full   0.999 
_refine_diff_density_max    2.584 
_refine_diff_density_min   -1.866 
_refine_diff_density_rms    0.160 

#===END
  
data_ortabs 
  
_audit_creation_method            SHELXL-97 
_chemical_name_systematic 
; 
 ? 
; 
_chemical_name_common             1�Cl2�4.5CH2Cl2 
_chemical_melting_point           ? 
_chemical_formula_moiety          ? 
_chemical_formula_sum 
 'C112.50 H87 Au Cl11 N6 O0 P6 Pd Tl' 
_chemical_formula_weight          2606.39 
  
loop_ 
 _atom_type_symbol 
 _atom_type_description 
 _atom_type_scat_dispersion_real 
 _atom_type_scat_dispersion_imag 
 _atom_type_scat_source 
 'C'  'C'   0.0033   0.0016 
 'International Tables Vol C Tables 4.2.6.8 and 6.1.1.4' 
 'H'  'H'   0.0000   0.0000 
 'International Tables Vol C Tables 4.2.6.8 and 6.1.1.4' 
 'N'  'N'   0.0061   0.0033 
 'International Tables Vol C Tables 4.2.6.8 and 6.1.1.4' 
 'O'  'O'   0.0106   0.0060 
 'International Tables Vol C Tables 4.2.6.8 and 6.1.1.4' 
 'P'  'P'   0.1023   0.0942 
 'International Tables Vol C Tables 4.2.6.8 and 6.1.1.4' 
 'Cl'  'Cl'   0.1484   0.1585 
 'International Tables Vol C Tables 4.2.6.8 and 6.1.1.4' 
 'Pd'  'Pd'  -0.9988   1.0072 
 'International Tables Vol C Tables 4.2.6.8 and 6.1.1.4' 
 'Au'  'Au'  -2.0133   8.8022 
 'International Tables Vol C Tables 4.2.6.8 and 6.1.1.4' 
 'Tl'  'Tl'  -2.8358   9.6688 
 'International Tables Vol C Tables 4.2.6.8 and 6.1.1.4' 
  
_symmetry_cell_setting            Orthorhombic 
_symmetry_space_group_name_H-M    Pbca 
  
loop_ 
 _symmetry_equiv_pos_as_xyz 
 'x, y, z' 
 '-x+1/2, -y, z+1/2' 
 '-x, y+1/2, -z+1/2' 
 'x+1/2, -y+1/2, -z' 
 '-x, -y, -z' 
 'x-1/2, y, -z-1/2' 
 'x, -y-1/2, z-1/2' 
 '-x-1/2, y-1/2, z' 
  
_cell_length_a                    27.3585(14) 
_cell_length_b                    26.8697(15) 
_cell_length_c                    29.4776(16) 
_cell_angle_alpha                 90.00 
_cell_angle_beta                  90.00 
_cell_angle_gamma                 90.00 
_cell_volume                      21669(2) 
_cell_formula_units_Z             8 
_cell_measurement_temperature     123(2) 
_cell_measurement_reflns_used     ? 
_cell_measurement_theta_min       ? 
_cell_measurement_theta_max       ? 
  
_exptl_crystal_description        shard 
_exptl_crystal_colour             deep 
_exptl_crystal_size_max           0.40 
_exptl_crystal_size_mid           0.28 
_exptl_crystal_size_min           0.11 
_exptl_crystal_density_meas       0 
_exptl_crystal_density_diffrn     1.598 
_exptl_crystal_density_method     'not measured' 
_exptl_crystal_F_000              10296 
_exptl_absorpt_coefficient_mu     3.409 
_exptl_absorpt_correction_type    none 
_exptl_absorpt_correction_T_min   0.3404 
_exptl_absorpt_correction_T_max   0.7076 
_exptl_absorpt_process_details    ? 
  
_exptl_special_details 
; 
 ? 
; 
  
_diffrn_ambient_temperature       123(2) 
_diffrn_radiation_wavelength      0.71073 
_diffrn_radiation_type            MoK\a 
_diffrn_radiation_source          'fine-focus sealed tube' 
_diffrn_radiation_monochromator   graphite 
_diffrn_measurement_device_type   'CCD area detector' 
_diffrn_measurement_method        'phi and omega scans' 
_diffrn_detector_area_resol_mean  ? 
_diffrn_standards_number          ? 
_diffrn_standards_interval_count  ? 
_diffrn_standards_interval_time   ? 
_diffrn_standards_decay_%         ? 
_diffrn_reflns_number             121155 
_diffrn_reflns_av_R_equivalents   0.0660 
_diffrn_reflns_av_sigmaI/netI     0.0530 
_diffrn_reflns_limit_h_min        -24 
_diffrn_reflns_limit_h_max        34 
_diffrn_reflns_limit_k_min        -33 
_diffrn_reflns_limit_k_max        30 
_diffrn_reflns_limit_l_min        -36 
_diffrn_reflns_limit_l_max        36 
_diffrn_reflns_theta_min          1.49 
_diffrn_reflns_theta_max          26.37 
_reflns_number_total              22109 
_reflns_number_gt                 16181 
_reflns_threshold_expression      >2sigma(I) 
  
_computing_data_collection        'Bruker SMART' 
_computing_cell_refinement        'Bruker SMART' 
_computing_data_reduction         'Bruker SAINT' 
_computing_structure_solution     'SHELXS-97 (Sheldrick, 1990)' 
_computing_structure_refinement   'SHELXL-97 (Sheldrick, 1997)' 
_computing_molecular_graphics     'Bruker SHELXTL' 
_computing_publication_material   'Bruker SHELXTL' 
  
_refine_special_details 
; 
 Refinement of F^2^ against ALL reflections.  The weighted R-factor wR and 
 goodness of fit S are based on F^2^, conventional R-factors R are based 
 on F, with F set to zero for negative F^2^. The threshold expression of 
 F^2^ > 2sigma(F^2^) is used only for calculating R-factors(gt) etc. and is 
 not relevant to the choice of reflections for refinement.  R-factors based 
 on F^2^ are statistically about twice as large as those based on F, and R- 
 factors based on ALL data will be even larger. 
; 
  
_refine_ls_structure_factor_coef  Fsqd 
_refine_ls_matrix_type            full 
_refine_ls_weighting_scheme       calc 
_refine_ls_weighting_details 
 'calc w=1/[\s^2^(Fo^2^)+(0.0926P)^2^+99.0000P] where P=(Fo^2^+2Fc^2^)/3' 
_atom_sites_solution_primary      direct 
_atom_sites_solution_secondary    difmap 
_atom_sites_solution_hydrogens    geom 
_refine_ls_hydrogen_treatment     mixed 
_refine_ls_extinction_method      none 
_refine_ls_extinction_coef        ? 
_refine_ls_number_reflns          22109 
_refine_ls_number_parameters      1290 
_refine_ls_number_restraints      2 
_refine_ls_R_factor_all           0.0858 
_refine_ls_R_factor_gt            0.0593 
_refine_ls_wR_factor_ref          0.1827 
_refine_ls_wR_factor_gt           0.1670 
_refine_ls_goodness_of_fit_ref    1.121 
_refine_ls_restrained_S_all       1.124 
_refine_ls_shift/su_max           0.002 
_refine_ls_shift/su_mean          0.000 
  
loop_ 
 _atom_site_label 
 _atom_site_type_symbol 
 _atom_site_fract_x 
 _atom_site_fract_y 
 _atom_site_fract_z 
 _atom_site_U_iso_or_equiv 
 _atom_site_adp_type 
 _atom_site_occupancy 
 _atom_site_symmetry_multiplicity 
 _atom_site_calc_flag 
 _atom_site_refinement_flags 
 _atom_site_disorder_assembly 
 _atom_site_disorder_group 
Au2 Au 0.92842(7) 0.82811(9) 0.12053(9) 0.0194(2) Uani 0.648(2) 1 d PD . . 
Au1 Au 0.7311(2) 0.7598(5) 0.1341(4) 0.0170(6) Uani 0.352(2) 1 d PD . . 
Pd2 Pd 0.9235(3) 0.8232(4) 0.1236(4) 0.0194(2) Uani 0.352(2) 1 d PD . . 
Pd1 Pd 0.7379(2) 0.7583(5) 0.1330(5) 0.0170(6) Uani 0.648(2) 1 d PD . . 
Tl1 Tl 0.830524(14) 0.789730(14) 0.131032(12) 0.04227(11) Uani 1 1 d D . . 
N1 N 0.8529(2) 0.8806(2) 0.21026(19) 0.0211(12) Uani 1 1 d . . . 
N2 N 0.7563(2) 0.8804(2) 0.17997(19) 0.0202(12) Uani 1 1 d . . . 
N3 N 0.8526(2) 0.8392(2) 0.0242(2) 0.0216(13) Uani 1 1 d . . . 
N4 N 0.7942(2) 0.7559(2) 0.02429(19) 0.0213(13) Uani 1 1 d . . . 
N5 N 0.9092(2) 0.7007(2) 0.14202(19) 0.0228(13) Uani 1 1 d . . . 
N6 N 0.8256(2) 0.6966(2) 0.1966(2) 0.0214(13) Uani 1 1 d . . . 
P1 P 0.94100(7) 0.83803(8) 0.19871(6) 0.0246(4) Uani 1 1 d . . . 
P2 P 0.69675(7) 0.83615(7) 0.12106(6) 0.0200(4) Uani 1 1 d . . . 
P3 P 0.90690(7) 0.89725(7) 0.07807(6) 0.0224(4) Uani 1 1 d . . . 
P4 P 0.74447(7) 0.69617(7) 0.08021(6) 0.0216(4) Uani 1 1 d . . . 
P5 P 0.95941(7) 0.75791(8) 0.08362(7) 0.0256(4) Uani 1 1 d . . . 
P6 P 0.73677(7) 0.73776(7) 0.21103(6) 0.0224(4) Uani 1 1 d . . . 
C1 C 0.8995(3) 0.8832(3) 0.2245(2) 0.0262(16) Uani 1 1 d . . . 
C2 C 0.9168(3) 0.9177(3) 0.2561(3) 0.036(2) Uani 1 1 d . . . 
H2A H 0.9500 0.9178 0.2653 0.044 Uiso 1 1 calc R . . 
C3 C 0.8841(3) 0.9517(3) 0.2735(3) 0.039(2) Uani 1 1 d . . . 
H3A H 0.8948 0.9760 0.2948 0.047 Uiso 1 1 calc R . . 
C4 C 0.8351(3) 0.9503(3) 0.2599(3) 0.0310(18) Uani 1 1 d . . . 
C5 C 0.8211(3) 0.9144(3) 0.2273(2) 0.0239(16) Uani 1 1 d . . . 
C6 C 0.7703(3) 0.9144(3) 0.2118(2) 0.0234(15) Uani 1 1 d . . . 
C7 C 0.7379(3) 0.9500(3) 0.2300(3) 0.0255(16) Uani 1 1 d . . . 
C8 C 0.6894(3) 0.9500(3) 0.2135(3) 0.0302(18) Uani 1 1 d . . . 
H8A H 0.6665 0.9737 0.2244 0.036 Uiso 1 1 calc R . . 
C9 C 0.6759(3) 0.9160(3) 0.1818(3) 0.0246(16) Uani 1 1 d . . . 
H9A H 0.6432 0.9154 0.1708 0.030 Uiso 1 1 calc R . . 
C10 C 0.7103(3) 0.8816(3) 0.1653(2) 0.0217(15) Uani 1 1 d . . . 
C11 C 0.8004(3) 0.9854(3) 0.2777(3) 0.0355(19) Uani 1 1 d . . . 
H11A H 0.8106 1.0094 0.2993 0.043 Uiso 1 1 calc R . . 
C12 C 0.7538(3) 0.9846(3) 0.2640(3) 0.0343(19) Uani 1 1 d . . . 
H12A H 0.7310 1.0071 0.2770 0.041 Uiso 1 1 calc R . . 
C13 C 0.8785(3) 0.8814(3) 0.0235(3) 0.0247(16) Uani 1 1 d . . . 
C14 C 0.8872(3) 0.9089(3) -0.0154(3) 0.0347(19) Uani 1 1 d . . . 
H14A H 0.9053 0.9391 -0.0138 0.042 Uiso 1 1 calc R . . 
C15 C 0.8696(3) 0.8924(3) -0.0564(3) 0.0353(19) Uani 1 1 d . . . 
H15A H 0.8741 0.9113 -0.0833 0.042 Uiso 1 1 calc R . . 
C16 C 0.8448(3) 0.8469(3) -0.0573(3) 0.0288(17) Uani 1 1 d . . . 
C17 C 0.8359(3) 0.8222(3) -0.0160(2) 0.0233(15) Uani 1 1 d . . . 
C18 C 0.8069(3) 0.7764(3) -0.0160(2) 0.0239(16) Uani 1 1 d . . . 
C19 C 0.7912(3) 0.7564(3) -0.0578(2) 0.0267(16) Uani 1 1 d . . . 
C20 C 0.7636(3) 0.7126(3) -0.0572(3) 0.0305(18) Uani 1 1 d . . . 
H20A H 0.7539 0.6973 -0.0848 0.037 Uiso 1 1 calc R . . 
C21 C 0.7506(3) 0.6920(3) -0.0166(3) 0.0306(17) Uani 1 1 d . . . 
H21A H 0.7316 0.6623 -0.0156 0.037 Uiso 1 1 calc R . . 
C22 C 0.7660(3) 0.7158(3) 0.0240(2) 0.0238(15) Uani 1 1 d . . . 
C23 C 0.8283(3) 0.8247(4) -0.0998(3) 0.039(2) Uani 1 1 d . . . 
H23A H 0.8354 0.8407 -0.1278 0.047 Uiso 1 1 calc R . . 
C24 C 0.8031(3) 0.7818(3) -0.0998(3) 0.0337(19) Uani 1 1 d . . . 
H24A H 0.7929 0.7678 -0.1278 0.040 Uiso 1 1 calc R . . 
C25 C 0.9493(3) 0.7006(3) 0.1163(2) 0.0245(16) Uani 1 1 d . . . 
C26 C 0.9836(3) 0.6616(3) 0.1162(3) 0.0334(19) Uani 1 1 d . . . 
H26A H 1.0109 0.6625 0.0964 0.040 Uiso 1 1 calc R . . 
C27 C 0.9770(3) 0.6231(3) 0.1448(3) 0.0344(19) Uani 1 1 d . . . 
H27A H 0.9997 0.5963 0.1452 0.041 Uiso 1 1 calc R . . 
C28 C 0.9369(3) 0.6224(3) 0.1736(3) 0.0301(17) Uani 1 1 d . . . 
C29 C 0.9025(3) 0.6619(3) 0.1710(2) 0.0241(16) Uani 1 1 d . . . 
C30 C 0.8609(3) 0.6614(3) 0.2014(3) 0.0239(16) Uani 1 1 d . . . 
C31 C 0.8572(3) 0.6233(3) 0.2344(3) 0.0262(16) Uani 1 1 d . . . 
C32 C 0.8181(3) 0.6236(3) 0.2641(2) 0.0299(18) Uani 1 1 d . . . 
H32A H 0.8160 0.5996 0.2876 0.036 Uiso 1 1 calc R . . 
C33 C 0.7820(3) 0.6591(3) 0.2592(3) 0.0292(17) Uani 1 1 d . . . 
H33A H 0.7547 0.6597 0.2791 0.035 Uiso 1 1 calc R . . 
C34 C 0.7865(3) 0.6942(3) 0.2244(2) 0.0232(15) Uani 1 1 d . . . 
C35 C 0.9299(3) 0.5830(3) 0.2066(3) 0.0298(17) Uani 1 1 d . . . 
H35A H 0.9521 0.5559 0.2072 0.036 Uiso 1 1 calc R . . 
C36 C 0.8933(3) 0.5841(3) 0.2358(3) 0.0327(18) Uani 1 1 d . . . 
H36A H 0.8907 0.5587 0.2581 0.039 Uiso 1 1 calc R . . 
C37 C 1.0010(3) 0.8664(3) 0.2052(3) 0.0264(16) Uani 1 1 d . . . 
C38 C 1.0159(3) 0.9006(3) 0.1731(3) 0.0333(18) Uani 1 1 d . . . 
H38A H 0.9948 0.9085 0.1485 0.040 Uiso 1 1 calc R . . 
C39 C 1.0617(3) 0.9239(3) 0.1761(3) 0.0350(19) Uani 1 1 d . . . 
H39A H 1.0710 0.9477 0.1539 0.042 Uiso 1 1 calc R . . 
C40 C 1.0926(3) 0.9129(3) 0.2103(3) 0.040(2) Uani 1 1 d . . . 
H40A H 1.1237 0.9285 0.2121 0.048 Uiso 1 1 calc R . . 
C41 C 1.0780(3) 0.8776(4) 0.2438(3) 0.046(2) Uani 1 1 d . . . 
H41A H 1.0992 0.8697 0.2683 0.056 Uiso 1 1 calc R . . 
C42 C 1.0328(3) 0.8550(4) 0.2402(3) 0.041(2) Uani 1 1 d . . . 
H42A H 1.0233 0.8311 0.2623 0.049 Uiso 1 1 calc R . . 
C43 C 0.9419(3) 0.7862(3) 0.2384(3) 0.0274(17) Uani 1 1 d . . . 
C44 C 0.9141(3) 0.7860(3) 0.2777(3) 0.0334(19) Uani 1 1 d . . . 
H44A H 0.8948 0.8142 0.2851 0.040 Uiso 1 1 calc R . . 
C45 C 0.9142(3) 0.7451(4) 0.3064(3) 0.042(2) Uani 1 1 d . . . 
H45A H 0.8941 0.7450 0.3326 0.051 Uiso 1 1 calc R . . 
C46 C 0.9431(4) 0.7050(4) 0.2969(3) 0.047(2) Uani 1 1 d . . . 
H46A H 0.9432 0.6771 0.3167 0.057 Uiso 1 1 calc R . . 
C47 C 0.9723(4) 0.7047(3) 0.2586(3) 0.042(2) Uani 1 1 d . . . 
H47A H 0.9929 0.6771 0.2522 0.050 Uiso 1 1 calc R . . 
C48 C 0.9710(3) 0.7451(3) 0.2297(3) 0.0353(19) Uani 1 1 d . . . 
H48A H 0.9906 0.7447 0.2031 0.042 Uiso 1 1 calc R . . 
C49 C 0.6307(3) 0.8255(3) 0.1243(2) 0.0237(15) Uani 1 1 d . . . 
C50 C 0.6131(3) 0.7951(3) 0.1591(2) 0.0275(17) Uani 1 1 d . . . 
H50A H 0.6347 0.7838 0.1822 0.033 Uiso 1 1 calc R . . 
C51 C 0.5642(3) 0.7812(3) 0.1602(3) 0.0334(19) Uani 1 1 d . . . 
H51A H 0.5524 0.7606 0.1841 0.040 Uiso 1 1 calc R . . 
C52 C 0.5331(3) 0.7969(4) 0.1272(3) 0.037(2) Uani 1 1 d . . . 
H52A H 0.4998 0.7871 0.1280 0.044 Uiso 1 1 calc R . . 
C53 C 0.5493(3) 0.8267(4) 0.0930(3) 0.040(2) Uani 1 1 d . . . 
H53A H 0.5271 0.8378 0.0704 0.048 Uiso 1 1 calc R . . 
C54 C 0.5985(3) 0.8410(3) 0.0909(3) 0.0328(18) Uani 1 1 d . . . 
H54A H 0.6097 0.8613 0.0666 0.039 Uiso 1 1 calc R . . 
C55 C 0.7029(3) 0.8748(3) 0.0701(3) 0.0277(17) Uani 1 1 d . . . 
C56 C 0.6921(4) 0.9244(3) 0.0688(3) 0.047(2) Uani 1 1 d . . . 
H56A H 0.6810 0.9404 0.0956 0.056 Uiso 1 1 calc R . . 
C57 C 0.6970(5) 0.9518(4) 0.0293(3) 0.059(3) Uani 1 1 d . . . 
H57A H 0.6884 0.9861 0.0288 0.071 Uiso 1 1 calc R . . 
C58 C 0.7141(4) 0.9292(4) -0.0087(3) 0.055(3) Uani 1 1 d . . . 
H58A H 0.7182 0.9479 -0.0358 0.065 Uiso 1 1 calc R . . 
C59 C 0.7255(4) 0.8806(5) -0.0081(3) 0.072(4) Uani 1 1 d . . . 
H59A H 0.7374 0.8651 -0.0349 0.086 Uiso 1 1 calc R . . 
C60 C 0.7200(4) 0.8527(4) 0.0310(3) 0.054(3) Uani 1 1 d . . . 
H60A H 0.7280 0.8183 0.0309 0.065 Uiso 1 1 calc R . . 
C61 C 0.9638(3) 0.9287(3) 0.0622(2) 0.0245(16) Uani 1 1 d . . . 
C62 C 0.9700(3) 0.9801(3) 0.0631(3) 0.0309(17) Uani 1 1 d . . . 
H62A H 0.9427 1.0012 0.0683 0.037 Uiso 1 1 calc R . . 
C63 C 1.0163(3) 1.0007(3) 0.0564(3) 0.039(2) Uani 1 1 d . . . 
H63A H 1.0203 1.0358 0.0568 0.047 Uiso 1 1 calc R . . 
C64 C 1.0561(3) 0.9705(4) 0.0493(3) 0.039(2) Uani 1 1 d . . . 
H64A H 1.0877 0.9846 0.0459 0.047 Uiso 1 1 calc R . . 
C65 C 1.0500(3) 0.9190(3) 0.0472(3) 0.0354(19) Uani 1 1 d . . . 
H65A H 1.0771 0.8979 0.0409 0.042 Uiso 1 1 calc R . . 
C66 C 1.0043(3) 0.8990(3) 0.0542(3) 0.0303(17) Uani 1 1 d . . . 
H66A H 1.0004 0.8639 0.0535 0.036 Uiso 1 1 calc R . . 
C67 C 0.8698(3) 0.9463(3) 0.1026(2) 0.0234(15) Uani 1 1 d . . . 
C68 C 0.8228(3) 0.9573(3) 0.0868(3) 0.0287(17) Uani 1 1 d . . . 
H68A H 0.8095 0.9400 0.0616 0.034 Uiso 1 1 calc R . . 
C69 C 0.7956(3) 0.9943(3) 0.1090(3) 0.0358(19) Uani 1 1 d . . . 
H69A H 0.7638 1.0025 0.0982 0.043 Uiso 1 1 calc R . . 
C70 C 0.8143(3) 1.0188(3) 0.1460(3) 0.0351(19) Uani 1 1 d . . . 
H70A H 0.7953 1.0437 0.1607 0.042 Uiso 1 1 calc R . . 
C71 C 0.8609(3) 1.0075(3) 0.1619(3) 0.0316(18) Uani 1 1 d . . . 
H71A H 0.8741 1.0249 0.1872 0.038 Uiso 1 1 calc R . . 
C72 C 0.8877(3) 0.9706(3) 0.1406(3) 0.0301(17) Uani 1 1 d . . . 
H72A H 0.9190 0.9619 0.1522 0.036 Uiso 1 1 calc R . . 
C73 C 0.6840(3) 0.6691(3) 0.0683(2) 0.0258(16) Uani 1 1 d . . . 
C74 C 0.6767(3) 0.6189(3) 0.0622(3) 0.039(2) Uani 1 1 d . . . 
H74A H 0.7037 0.5967 0.0624 0.047 Uiso 1 1 calc R . . 
C75 C 0.6297(4) 0.6008(4) 0.0559(4) 0.051(3) Uani 1 1 d . . . 
H75A H 0.6246 0.5661 0.0520 0.062 Uiso 1 1 calc R . . 
C76 C 0.5903(3) 0.6328(4) 0.0552(3) 0.050(3) Uani 1 1 d . . . 
H76A H 0.5582 0.6201 0.0511 0.060 Uiso 1 1 calc R . . 
C77 C 0.5977(3) 0.6835(4) 0.0605(3) 0.047(2) Uani 1 1 d . . . 
H77A H 0.5708 0.7058 0.0591 0.057 Uiso 1 1 calc R . . 
C78 C 0.6444(3) 0.7016(3) 0.0678(3) 0.037(2) Uani 1 1 d . . . 
H78A H 0.6494 0.7362 0.0726 0.045 Uiso 1 1 calc R . . 
C79 C 0.7823(3) 0.6419(3) 0.0920(3) 0.0252(16) Uani 1 1 d . . . 
C80 C 0.7743(3) 0.6163(3) 0.1325(3) 0.0302(17) Uani 1 1 d . . . 
H80A H 0.7492 0.6272 0.1525 0.036 Uiso 1 1 calc R . . 
C81 C 0.8029(3) 0.5745(3) 0.1443(3) 0.0345(19) Uani 1 1 d . . . 
H81A H 0.7972 0.5573 0.1719 0.041 Uiso 1 1 calc R . . 
C82 C 0.8388(3) 0.5592(3) 0.1155(3) 0.040(2) Uani 1 1 d . . . 
H82A H 0.8580 0.5310 0.1231 0.048 Uiso 1 1 calc R . . 
C83 C 0.8474(3) 0.5840(3) 0.0758(3) 0.044(2) Uani 1 1 d . . . 
H83A H 0.8731 0.5733 0.0565 0.053 Uiso 1 1 calc R . . 
C84 C 0.8189(3) 0.6252(3) 0.0631(3) 0.0352(19) Uani 1 1 d . . . 
H84A H 0.8246 0.6416 0.0350 0.042 Uiso 1 1 calc R . . 
C85 C 1.0265(3) 0.7609(3) 0.0791(3) 0.0339(19) Uani 1 1 d . . . 
C86 C 1.0522(3) 0.7392(4) 0.0443(3) 0.049(2) Uani 1 1 d . . . 
H86A H 1.0355 0.7212 0.0214 0.059 Uiso 1 1 calc R . . 
C87 C 1.1028(4) 0.7438(5) 0.0428(4) 0.066(3) Uani 1 1 d . . . 
H87A H 1.1206 0.7293 0.0186 0.079 Uiso 1 1 calc R . . 
C88 C 1.1269(4) 0.7694(5) 0.0765(5) 0.069(4) Uani 1 1 d . . . 
H88A H 1.1614 0.7723 0.0752 0.082 Uiso 1 1 calc R . . 
C89 C 1.1024(4) 0.7906(5) 0.1114(5) 0.067(3) Uani 1 1 d . . . 
H89A H 1.1194 0.8079 0.1347 0.080 Uiso 1 1 calc R . . 
C90 C 1.0515(3) 0.7865(4) 0.1122(4) 0.047(2) Uani 1 1 d . . . 
H90A H 1.0337 0.8017 0.1361 0.056 Uiso 1 1 calc R . . 
C91 C 0.9406(3) 0.7417(3) 0.0262(3) 0.0290(17) Uani 1 1 d . . . 
C92 C 0.9169(3) 0.6986(4) 0.0166(3) 0.039(2) Uani 1 1 d . . . 
H92A H 0.9097 0.6757 0.0403 0.046 Uiso 1 1 calc R . . 
C93 C 0.9029(4) 0.6878(4) -0.0279(3) 0.047(2) Uani 1 1 d . . . 
H93A H 0.8855 0.6580 -0.0342 0.057 Uiso 1 1 calc R . . 
C94 C 0.9143(4) 0.7200(4) -0.0626(3) 0.048(3) Uani 1 1 d . . . 
H94A H 0.9057 0.7118 -0.0929 0.058 Uiso 1 1 calc R . . 
C95 C 0.9377(4) 0.7636(4) -0.0537(3) 0.050(3) Uani 1 1 d . . . 
H95A H 0.9450 0.7861 -0.0776 0.061 Uiso 1 1 calc R . . 
C96 C 0.9510(4) 0.7747(4) -0.0092(3) 0.042(2) Uani 1 1 d . . . 
H96A H 0.9673 0.8052 -0.0028 0.051 Uiso 1 1 calc R . . 
C97 C 0.6819(3) 0.7026(3) 0.2279(3) 0.0282(17) Uani 1 1 d . . . 
C98 C 0.6628(3) 0.7013(4) 0.2713(3) 0.044(2) Uani 1 1 d . . . 
H98A H 0.6774 0.7210 0.2944 0.053 Uiso 1 1 calc R . . 
C99 C 0.6229(4) 0.6719(4) 0.2816(4) 0.056(3) Uani 1 1 d . . . 
H99A H 0.6102 0.6716 0.3115 0.067 Uiso 1 1 calc R . . 
C100 C 0.6020(4) 0.6434(4) 0.2492(4) 0.055(3) Uani 1 1 d . . . 
H10A H 0.5747 0.6232 0.2568 0.066 Uiso 1 1 calc R . . 
C101 C 0.6195(3) 0.6434(3) 0.2057(4) 0.044(2) Uani 1 1 d . . . 
H10B H 0.6049 0.6230 0.1831 0.053 Uiso 1 1 calc R . . 
C102 C 0.6597(3) 0.6742(3) 0.1948(3) 0.0339(18) Uani 1 1 d . . . 
H10C H 0.6714 0.6754 0.1645 0.041 Uiso 1 1 calc R . . 
C103 C 0.7435(3) 0.7835(3) 0.2565(2) 0.0241(16) Uani 1 1 d . . . 
C104 C 0.7873(3) 0.7895(3) 0.2785(3) 0.0303(18) Uani 1 1 d . . . 
H10D H 0.8143 0.7690 0.2706 0.036 Uiso 1 1 calc R . . 
C105 C 0.7925(3) 0.8255(3) 0.3122(3) 0.037(2) Uani 1 1 d . . . 
H10E H 0.8230 0.8290 0.3273 0.045 Uiso 1 1 calc R . . 
C106 C 0.7538(3) 0.8562(3) 0.3240(3) 0.0344(19) Uani 1 1 d . . . 
H10F H 0.7574 0.8806 0.3471 0.041 Uiso 1 1 calc R . . 
C107 C 0.7100(3) 0.8506(4) 0.3015(3) 0.041(2) Uani 1 1 d . . . 
H10G H 0.6832 0.8715 0.3090 0.049 Uiso 1 1 calc R . . 
C108 C 0.7045(3) 0.8147(3) 0.2679(3) 0.037(2) Uani 1 1 d . . . 
H10H H 0.6741 0.8113 0.2527 0.045 Uiso 1 1 calc R . . 
C1S C -0.0142(4) 0.5463(6) 0.3294(4) 0.079(4) Uani 1 1 d . . . 
H1SA H -0.0133 0.5177 0.3505 0.094 Uiso 1 1 calc R . . 
H1SB H -0.0487 0.5515 0.3204 0.094 Uiso 1 1 calc R . . 
Cl1 Cl 0.01906(10) 0.53137(12) 0.28178(11) 0.0688(8) Uani 1 1 d . . . 
Cl2 Cl 0.00590(13) 0.59882(12) 0.35795(12) 0.0752(9) Uani 1 1 d . . . 
C2S C 0.6826(5) 0.6036(4) 0.3727(5) 0.068(3) Uani 1 1 d . . . 
H2SA H 0.6638 0.5992 0.3443 0.082 Uiso 1 1 calc R . . 
H2SB H 0.6650 0.5858 0.3972 0.082 Uiso 1 1 calc R . . 
Cl3 Cl 0.74122(10) 0.57702(11) 0.36605(9) 0.0571(7) Uani 1 1 d . . . 
Cl4 Cl 0.68529(14) 0.66686(12) 0.38598(12) 0.0767(9) Uani 1 1 d . . . 
C3S C 0.6994(4) 0.5418(4) 0.9205(3) 0.056(3) Uani 1 1 d . . . 
H3SA H 0.6810 0.5190 0.9004 0.067 Uiso 1 1 calc R . . 
H3SB H 0.7340 0.5416 0.9107 0.067 Uiso 1 1 calc R . . 
Cl5 Cl 0.69531(12) 0.52079(13) 0.97689(11) 0.0739(9) Uani 1 1 d . . . 
Cl6 Cl 0.67546(10) 0.60291(10) 0.91524(9) 0.0534(6) Uani 1 1 d . . . 
C4S C 0.8544(7) 0.5577(7) 0.8927(6) 0.043(4) Uiso 0.50 1 d P . . 
H4SA H 0.8280 0.5567 0.8698 0.051 Uiso 0.50 1 calc PR . . 
H4SB H 0.8716 0.5253 0.8917 0.051 Uiso 0.50 1 calc PR . . 
Cl7 Cl 0.89709(16) 0.60676(15) 0.87796(11) 0.0335(9) Uani 0.50 1 d P . . 
Cl8 Cl 0.8298(2) 0.5650(3) 0.9437(2) 0.074(2) Uani 0.50 1 d P . . 
C5S C 0.9596(6) 0.4355(6) 0.9673(4) 0.028(4) Uani 0.50 1 d P . . 
H5SA H 0.9495 0.4670 0.9818 0.034 Uiso 0.50 1 calc PR . . 
H5SB H 0.9662 0.4422 0.9348 0.034 Uiso 0.50 1 calc PR . . 
Cl9 Cl 0.91305(16) 0.3918(2) 0.97225(13) 0.0461(12) Uani 0.50 1 d P . . 
Cl10 Cl 1.01301(17) 0.4130(2) 0.99345(13) 0.0491(13) Uani 0.50 1 d P . . 
C6S C 0.0131(4) 0.9570(5) 0.3815(4) 0.017(3) Uani 0.50 1 d P . . 
H6SA H -0.0148 0.9801 0.3780 0.020 Uiso 0.50 1 calc PR . . 
H6SB H 0.0008 0.9264 0.3965 0.020 Uiso 0.50 1 calc PR . . 
Cl11 Cl 0.03564(12) 0.94161(15) 0.32818(12) 0.0285(8) Uani 0.50 1 d P . . 
Cl12 Cl 0.05711(14) 0.98451(16) 0.41564(13) 0.0346(9) Uani 0.50 1 d P . . 
Cl13 Cl 0.07837(9) 0.54305(9) 0.14647(9) 0.0500(6) Uani 1 1 d . . . 
Cl14 Cl 0.85851(8) 0.52987(8) 0.34233(7) 0.0374(5) Uani 1 1 d . . . 
  
loop_ 
 _atom_site_aniso_label 
 _atom_site_aniso_U_11 
 _atom_site_aniso_U_22 
 _atom_site_aniso_U_33 
 _atom_site_aniso_U_23 
 _atom_site_aniso_U_13 
 _atom_site_aniso_U_12 
Au2 0.0142(5) 0.0203(6) 0.0237(4) 0.0034(4) 0.0020(3) -0.0027(3) 
Au1 0.0089(13) 0.0210(6) 0.0212(5) -0.0005(4) 0.0004(13) 0.0026(14) 
Pd2 0.0142(5) 0.0203(6) 0.0237(4) 0.0034(4) 0.0020(3) -0.0027(3) 
Pd1 0.0089(13) 0.0210(6) 0.0212(5) -0.0005(4) 0.0004(13) 0.0026(14) 
Tl1 0.0450(2) 0.0409(2) 0.0409(2) 0.00288(15) -0.00347(15) -0.00128(16) 
N1 0.018(3) 0.021(3) 0.024(3) -0.003(2) 0.000(2) 0.000(2) 
N2 0.016(3) 0.023(3) 0.022(3) 0.002(2) 0.003(2) 0.002(2) 
N3 0.018(3) 0.023(3) 0.025(3) 0.004(2) 0.004(2) -0.002(2) 
N4 0.020(3) 0.021(3) 0.023(3) 0.000(2) 0.001(2) 0.001(2) 
N5 0.025(3) 0.023(3) 0.021(3) 0.003(2) -0.005(2) 0.002(3) 
N6 0.016(3) 0.024(3) 0.025(3) 0.004(2) -0.001(2) 0.000(2) 
P1 0.0179(9) 0.0290(11) 0.0267(9) -0.0002(8) -0.0041(7) -0.0004(8) 
P2 0.0139(9) 0.0236(10) 0.0226(9) 0.0012(7) 0.0003(7) 0.0005(7) 
P3 0.0166(9) 0.0229(10) 0.0277(9) 0.0016(8) 0.0012(7) -0.0013(8) 
P4 0.0188(9) 0.0210(10) 0.0250(9) 0.0001(7) 0.0007(7) -0.0014(7) 
P5 0.0219(10) 0.0274(10) 0.0275(9) 0.0023(8) 0.0043(8) 0.0032(8) 
P6 0.0178(9) 0.0271(10) 0.0225(9) 0.0032(8) 0.0015(7) 0.0006(8) 
C1 0.021(4) 0.031(4) 0.026(4) -0.003(3) -0.002(3) -0.001(3) 
C2 0.033(5) 0.039(5) 0.038(5) -0.009(4) -0.011(4) 0.000(4) 
C3 0.044(5) 0.039(5) 0.036(4) -0.015(4) -0.011(4) 0.004(4) 
C4 0.036(5) 0.031(4) 0.026(4) -0.004(3) -0.005(3) 0.001(4) 
C5 0.028(4) 0.019(4) 0.024(4) 0.001(3) 0.001(3) 0.000(3) 
C6 0.026(4) 0.021(4) 0.024(4) 0.002(3) 0.005(3) 0.000(3) 
C7 0.025(4) 0.022(4) 0.030(4) -0.001(3) 0.008(3) -0.001(3) 
C8 0.021(4) 0.023(4) 0.046(5) 0.002(4) 0.011(3) 0.007(3) 
C9 0.015(3) 0.023(4) 0.036(4) 0.002(3) 0.002(3) 0.005(3) 
C10 0.018(4) 0.022(4) 0.025(3) 0.003(3) 0.002(3) -0.002(3) 
C11 0.037(5) 0.032(5) 0.037(4) -0.017(4) -0.002(4) 0.006(4) 
C12 0.038(5) 0.029(5) 0.036(4) -0.008(4) 0.010(4) 0.007(4) 
C13 0.022(4) 0.021(4) 0.031(4) 0.003(3) 0.000(3) 0.002(3) 
C14 0.036(5) 0.039(5) 0.030(4) 0.011(4) 0.000(3) -0.006(4) 
C15 0.040(5) 0.038(5) 0.028(4) 0.014(4) -0.001(4) -0.003(4) 
C16 0.020(4) 0.039(5) 0.027(4) 0.009(3) -0.004(3) -0.001(3) 
C17 0.020(4) 0.023(4) 0.027(4) 0.004(3) 0.001(3) 0.005(3) 
C18 0.022(4) 0.024(4) 0.025(4) -0.001(3) -0.004(3) 0.002(3) 
C19 0.022(4) 0.035(4) 0.024(4) -0.002(3) -0.003(3) 0.002(3) 
C20 0.031(4) 0.037(5) 0.023(4) -0.007(3) -0.006(3) 0.000(4) 
C21 0.029(4) 0.035(5) 0.028(4) -0.007(3) 0.001(3) -0.004(3) 
C22 0.023(4) 0.025(4) 0.024(4) -0.001(3) 0.003(3) 0.001(3) 
C23 0.038(5) 0.050(6) 0.029(4) 0.011(4) 0.001(4) 0.013(4) 
C24 0.032(4) 0.044(5) 0.025(4) -0.001(4) -0.004(3) -0.001(4) 
C25 0.025(4) 0.029(4) 0.019(3) 0.001(3) 0.005(3) 0.000(3) 
C26 0.033(5) 0.031(5) 0.035(4) -0.001(3) 0.011(4) 0.009(4) 
C27 0.032(5) 0.027(4) 0.044(5) 0.001(4) 0.006(4) 0.013(4) 
C28 0.028(4) 0.031(4) 0.032(4) 0.004(3) -0.007(3) 0.005(3) 
C29 0.024(4) 0.024(4) 0.024(4) -0.001(3) -0.007(3) 0.001(3) 
C30 0.026(4) 0.014(4) 0.031(4) 0.000(3) -0.007(3) -0.001(3) 
C31 0.024(4) 0.025(4) 0.029(4) 0.004(3) -0.010(3) -0.002(3) 
C32 0.037(5) 0.031(4) 0.022(4) 0.011(3) -0.005(3) -0.002(4) 
C33 0.028(4) 0.035(4) 0.024(4) 0.007(3) 0.004(3) -0.006(3) 
C34 0.022(4) 0.027(4) 0.021(3) -0.001(3) -0.006(3) 0.001(3) 
C35 0.031(4) 0.023(4) 0.035(4) 0.003(3) -0.007(3) 0.005(3) 
C36 0.040(5) 0.026(4) 0.033(4) 0.007(3) -0.009(4) 0.003(4) 
C37 0.018(4) 0.032(4) 0.030(4) -0.004(3) -0.004(3) 0.002(3) 
C38 0.023(4) 0.036(5) 0.041(5) -0.002(4) -0.007(3) -0.001(4) 
C39 0.021(4) 0.034(5) 0.051(5) -0.002(4) -0.004(4) -0.005(3) 
C40 0.026(4) 0.041(5) 0.054(5) -0.007(4) -0.010(4) -0.003(4) 
C41 0.035(5) 0.055(6) 0.049(5) 0.004(5) -0.014(4) -0.005(4) 
C42 0.033(5) 0.045(5) 0.045(5) 0.009(4) -0.010(4) -0.007(4) 
C43 0.023(4) 0.032(4) 0.027(4) 0.003(3) -0.005(3) -0.003(3) 
C44 0.032(4) 0.033(5) 0.035(4) 0.003(4) -0.003(4) -0.001(4) 
C45 0.035(5) 0.053(6) 0.039(5) 0.008(4) -0.006(4) -0.006(4) 
C46 0.058(6) 0.043(6) 0.041(5) 0.014(4) -0.021(5) -0.011(5) 
C47 0.051(6) 0.037(5) 0.038(5) -0.001(4) -0.018(4) 0.006(4) 
C48 0.036(5) 0.038(5) 0.032(4) -0.003(4) -0.008(4) -0.002(4) 
C49 0.019(4) 0.027(4) 0.025(4) -0.005(3) 0.003(3) -0.001(3) 
C50 0.014(4) 0.045(5) 0.023(4) 0.001(3) -0.001(3) 0.000(3) 
C51 0.032(5) 0.035(5) 0.034(4) 0.000(4) 0.013(4) -0.004(4) 
C52 0.021(4) 0.055(6) 0.034(4) -0.013(4) 0.000(3) -0.006(4) 
C53 0.020(4) 0.056(6) 0.043(5) 0.000(4) -0.012(4) 0.002(4) 
C54 0.029(4) 0.041(5) 0.028(4) 0.008(4) -0.005(3) 0.005(4) 
C55 0.015(3) 0.040(5) 0.029(4) 0.007(3) -0.001(3) 0.001(3) 
C56 0.077(7) 0.032(5) 0.032(5) 0.008(4) -0.004(5) -0.010(5) 
C57 0.098(9) 0.038(6) 0.042(6) 0.012(5) -0.013(6) -0.018(6) 
C58 0.046(6) 0.074(8) 0.044(6) 0.030(5) -0.001(5) -0.013(6) 
C59 0.074(8) 0.106(10) 0.035(5) 0.032(6) 0.026(5) 0.050(7) 
C60 0.065(7) 0.060(7) 0.038(5) 0.013(5) 0.011(5) 0.044(6) 
C61 0.025(4) 0.027(4) 0.022(3) 0.003(3) 0.001(3) -0.005(3) 
C62 0.023(4) 0.034(5) 0.036(4) 0.007(4) 0.002(3) 0.000(3) 
C63 0.035(5) 0.028(5) 0.054(5) 0.015(4) 0.009(4) -0.007(4) 
C64 0.023(4) 0.049(6) 0.046(5) 0.019(4) 0.001(4) -0.008(4) 
C65 0.019(4) 0.041(5) 0.047(5) 0.010(4) 0.007(4) 0.001(4) 
C66 0.028(4) 0.025(4) 0.038(4) 0.006(3) 0.007(3) -0.002(3) 
C67 0.025(4) 0.017(4) 0.028(4) 0.005(3) 0.005(3) 0.001(3) 
C68 0.021(4) 0.025(4) 0.040(4) 0.005(3) 0.003(3) -0.002(3) 
C69 0.031(5) 0.031(5) 0.045(5) 0.001(4) 0.001(4) 0.006(4) 
C70 0.029(4) 0.032(5) 0.044(5) 0.003(4) 0.007(4) 0.007(4) 
C71 0.040(5) 0.024(4) 0.031(4) 0.000(3) -0.001(3) -0.001(3) 
C72 0.028(4) 0.031(4) 0.031(4) 0.006(3) 0.001(3) 0.000(3) 
C73 0.020(4) 0.033(4) 0.024(4) 0.003(3) 0.000(3) -0.007(3) 
C74 0.031(5) 0.038(5) 0.047(5) 0.003(4) -0.007(4) -0.013(4) 
C75 0.048(6) 0.039(5) 0.068(7) 0.003(5) -0.010(5) -0.019(5) 
C76 0.030(5) 0.071(7) 0.048(5) -0.002(5) -0.001(4) -0.027(5) 
C77 0.033(5) 0.069(7) 0.040(5) -0.015(5) -0.005(4) -0.001(5) 
C78 0.030(5) 0.040(5) 0.041(5) -0.011(4) -0.005(4) -0.001(4) 
C79 0.021(4) 0.018(4) 0.036(4) -0.007(3) -0.002(3) 0.000(3) 
C80 0.029(4) 0.031(4) 0.030(4) -0.003(3) -0.002(3) -0.002(3) 
C81 0.039(5) 0.016(4) 0.049(5) 0.003(3) -0.010(4) 0.000(3) 
C82 0.044(5) 0.028(5) 0.047(5) -0.003(4) -0.008(4) 0.007(4) 
C83 0.035(5) 0.037(5) 0.059(6) -0.007(4) 0.010(4) 0.015(4) 
C84 0.043(5) 0.030(5) 0.033(4) 0.001(3) 0.009(4) 0.010(4) 
C85 0.020(4) 0.035(5) 0.047(5) 0.013(4) 0.011(4) 0.005(3) 
C86 0.035(5) 0.065(7) 0.048(5) 0.012(5) 0.014(4) 0.016(5) 
C87 0.030(6) 0.086(9) 0.082(8) 0.023(7) 0.029(6) 0.015(6) 
C88 0.018(5) 0.084(9) 0.103(10) 0.025(8) 0.010(6) 0.006(5) 
C89 0.023(5) 0.072(8) 0.105(10) -0.005(7) -0.008(6) 0.006(5) 
C90 0.023(4) 0.049(6) 0.067(6) 0.001(5) -0.004(4) -0.002(4) 
C91 0.029(4) 0.032(4) 0.025(4) -0.001(3) 0.004(3) 0.009(4) 
C92 0.035(5) 0.053(6) 0.028(4) 0.003(4) 0.005(4) 0.004(4) 
C93 0.044(6) 0.056(6) 0.041(5) -0.007(5) -0.006(4) -0.002(5) 
C94 0.048(6) 0.070(7) 0.026(4) -0.008(5) 0.003(4) 0.019(5) 
C95 0.059(7) 0.058(7) 0.034(5) 0.010(5) 0.012(4) 0.024(5) 
C96 0.050(6) 0.043(5) 0.034(5) 0.001(4) 0.005(4) 0.012(4) 
C97 0.019(4) 0.029(4) 0.036(4) 0.009(3) 0.004(3) 0.003(3) 
C98 0.033(5) 0.058(6) 0.040(5) 0.009(4) 0.006(4) -0.011(4) 
C99 0.040(6) 0.080(8) 0.047(6) 0.017(5) 0.013(5) -0.013(5) 
C100 0.035(5) 0.052(6) 0.078(8) 0.022(6) 0.008(5) -0.012(5) 
C101 0.033(5) 0.037(5) 0.063(6) 0.004(4) 0.002(4) -0.004(4) 
C102 0.028(4) 0.033(5) 0.041(5) 0.002(4) 0.001(4) -0.001(4) 
C103 0.023(4) 0.032(4) 0.017(3) 0.006(3) 0.004(3) 0.005(3) 
C104 0.025(4) 0.037(5) 0.029(4) -0.001(3) 0.003(3) 0.001(3) 
C105 0.027(4) 0.048(5) 0.038(5) -0.007(4) 0.005(4) -0.007(4) 
C106 0.039(5) 0.035(5) 0.029(4) -0.005(4) 0.004(4) -0.003(4) 
C107 0.043(5) 0.048(6) 0.032(4) -0.006(4) 0.006(4) 0.012(4) 
C108 0.036(5) 0.046(5) 0.030(4) -0.001(4) -0.001(4) 0.009(4) 
C1S 0.052(7) 0.112(11) 0.072(8) -0.014(8) -0.015(6) -0.016(7) 
Cl1 0.0484(16) 0.075(2) 0.083(2) 0.0142(16) -0.0166(14) 0.0045(14) 
Cl2 0.076(2) 0.0575(18) 0.092(2) 0.0148(16) -0.0120(17) -0.0092(15) 
C2S 0.062(8) 0.047(7) 0.096(9) -0.010(6) -0.006(6) -0.001(6) 
Cl3 0.0566(16) 0.0617(17) 0.0530(14) -0.0106(12) 0.0014(12) -0.0002(13) 
Cl4 0.088(2) 0.0614(19) 0.081(2) -0.0101(16) -0.0044(17) 0.0084(17) 
C3S 0.064(7) 0.055(7) 0.049(6) -0.015(5) -0.001(5) -0.006(5) 
Cl5 0.069(2) 0.081(2) 0.0719(19) 0.0156(16) -0.0144(15) 0.0106(17) 
Cl6 0.0518(15) 0.0543(15) 0.0541(14) 0.0049(12) 0.0045(11) -0.0092(12) 
Cl7 0.054(3) 0.030(2) 0.0161(16) -0.0059(14) -0.0026(16) 0.0198(18) 
Cl8 0.060(3) 0.104(5) 0.060(3) -0.042(3) 0.026(3) -0.039(3) 
C5S 0.056(11) 0.021(8) 0.008(6) 0.002(5) -0.011(6) 0.008(7) 
Cl9 0.034(2) 0.081(4) 0.0232(18) 0.024(2) 0.0040(16) -0.012(2) 
Cl10 0.043(3) 0.081(4) 0.0228(19) 0.021(2) 0.0081(17) 0.027(2) 
C6S 0.004(6) 0.020(7) 0.026(7) -0.001(6) -0.003(5) 0.006(5) 
Cl11 0.0147(16) 0.045(2) 0.0260(17) -0.0088(16) -0.0088(13) 0.0122(15) 
Cl12 0.0276(19) 0.047(2) 0.0294(18) -0.0084(17) 0.0072(15) -0.0270(18) 
Cl13 0.0427(13) 0.0447(14) 0.0626(15) 0.0128(11) -0.0063(11) 0.0118(11) 
Cl14 0.0385(11) 0.0422(12) 0.0315(10) 0.0097(9) 0.0037(8) 0.0086(9) 
  
_geom_special_details 
; 
 All esds (except the esd in the dihedral angle between two l.s. planes) 
 are estimated using the full covariance matrix.  The cell esds are taken 
 into account individually in the estimation of esds in distances, angles 
 and torsion angles; correlations between esds in cell parameters are only 
 used when they are defined by crystal symmetry.  An approximate (isotropic) 
 treatment of cell esds is used for estimating esds involving l.s. planes. 
; 
  
loop_ 
 _geom_bond_atom_site_label_1 
 _geom_bond_atom_site_label_2 
 _geom_bond_distance 
 _geom_bond_site_symmetry_2 
 _geom_bond_publ_flag 
Au2 P1 2.345(3) . ? 
Au2 P3 2.316(3) . ? 
Au2 P5 2.337(4) . ? 
Au2 Tl1 2.8865(16) . ? 
Au1 P4 2.362(13) . ? 
Au1 P2 2.289(13) . ? 
Au1 P6 2.350(13) . ? 
Au1 Tl1 2.839(5) . ? 
Pd2 P5 2.330(12) . ? 
Pd2 P3 2.443(11) . ? 
Pd2 P1 2.302(11) . ? 
Pd2 Tl1 2.706(6) . ? 
Pd1 P2 2.401(14) . ? 
Pd1 P4 2.290(14) . ? 
Pd1 P6 2.364(14) . ? 
Pd1 Tl1 2.673(5) . ? 
N1 C1 1.344(9) . ? 
N1 C5 1.354(9) . ? 
N2 C10 1.333(9) . ? 
N2 C6 1.365(9) . ? 
N3 C13 1.337(9) . ? 
N3 C17 1.350(9) . ? 
N4 C22 1.327(9) . ? 
N4 C18 1.355(9) . ? 
N5 C25 1.333(10) . ? 
N5 C29 1.359(9) . ? 
N6 C34 1.352(9) . ? 
N6 C30 1.360(9) . ? 
P1 C43 1.819(8) . ? 
P1 C37 1.820(8) . ? 
P1 C1 1.829(8) . ? 
P2 C10 1.824(7) . ? 
P2 C55 1.833(8) . ? 
P2 C49 1.831(8) . ? 
P3 C67 1.814(7) . ? 
P3 C61 1.833(7) . ? 
P3 C13 1.838(8) . ? 
P4 C79 1.822(8) . ? 
P4 C22 1.835(7) . ? 
P4 C73 1.840(7) . ? 
P5 C91 1.821(8) . ? 
P5 C25 1.837(8) . ? 
P5 C85 1.841(8) . ? 
P6 C103 1.829(8) . ? 
P6 C34 1.836(8) . ? 
P6 C97 1.843(8) . ? 
C1 C2 1.397(11) . ? 
C2 C3 1.376(12) . ? 
C3 C4 1.401(12) . ? 
C4 C5 1.415(10) . ? 
C4 C11 1.437(11) . ? 
C5 C6 1.463(10) . ? 
C6 C7 1.408(10) . ? 
C7 C8 1.413(11) . ? 
C7 C12 1.435(11) . ? 
C8 C9 1.359(11) . ? 
C9 C10 1.404(10) . ? 
C11 C12 1.334(12) . ? 
C13 C14 1.385(10) . ? 
C14 C15 1.373(12) . ? 
C15 C16 1.398(12) . ? 
C16 C17 1.407(10) . ? 
C16 C23 1.460(12) . ? 
C17 C18 1.465(11) . ? 
C18 C19 1.413(10) . ? 
C19 C20 1.396(11) . ? 
C19 C24 1.449(11) . ? 
C20 C21 1.366(11) . ? 
C21 C22 1.421(10) . ? 
C23 C24 1.343(13) . ? 
C25 C26 1.406(11) . ? 
C26 C27 1.347(12) . ? 
C27 C28 1.388(11) . ? 
C28 C29 1.421(11) . ? 
C28 C35 1.448(11) . ? 
C29 C30 1.449(11) . ? 
C30 C31 1.417(10) . ? 
C31 C32 1.382(11) . ? 
C31 C36 1.444(11) . ? 
C32 C33 1.379(11) . ? 
C33 C34 1.399(10) . ? 
C35 C36 1.321(12) . ? 
C37 C38 1.380(11) . ? 
C37 C42 1.384(11) . ? 
C38 C39 1.404(11) . ? 
C39 C40 1.349(12) . ? 
C40 C41 1.425(13) . ? 
C41 C42 1.382(12) . ? 
C43 C48 1.386(12) . ? 
C43 C44 1.385(11) . ? 
C44 C45 1.385(12) . ? 
C45 C46 1.365(14) . ? 
C46 C47 1.384(14) . ? 
C47 C48 1.380(12) . ? 
C49 C54 1.386(10) . ? 
C49 C50 1.398(11) . ? 
C50 C51 1.390(11) . ? 
C51 C52 1.359(12) . ? 
C52 C53 1.361(13) . ? 
C53 C54 1.400(11) . ? 
C55 C56 1.366(12) . ? 
C55 C60 1.378(12) . ? 
C56 C57 1.382(13) . ? 
C57 C58 1.358(16) . ? 
C58 C59 1.344(16) . ? 
C59 C60 1.384(13) . ? 
C61 C66 1.385(11) . ? 
C61 C62 1.392(11) . ? 
C62 C63 1.395(11) . ? 
C63 C64 1.376(12) . ? 
C64 C65 1.395(13) . ? 
C65 C66 1.376(11) . ? 
C67 C72 1.387(11) . ? 
C67 C68 1.400(10) . ? 
C68 C69 1.402(11) . ? 
C69 C70 1.373(12) . ? 
C70 C71 1.392(12) . ? 
C71 C72 1.385(11) . ? 
C73 C74 1.376(12) . ? 
C73 C78 1.393(12) . ? 
C74 C75 1.388(12) . ? 
C75 C76 1.377(15) . ? 
C76 C77 1.387(15) . ? 
C77 C78 1.384(12) . ? 
C79 C84 1.388(11) . ? 
C79 C80 1.396(11) . ? 
C80 C81 1.414(11) . ? 
C81 C82 1.360(13) . ? 
C82 C83 1.367(13) . ? 
C83 C84 1.405(12) . ? 
C85 C86 1.373(12) . ? 
C85 C90 1.375(13) . ? 
C86 C87 1.388(14) . ? 
C87 C88 1.377(18) . ? 
C88 C89 1.352(17) . ? 
C89 C90 1.399(13) . ? 
C91 C92 1.356(12) . ? 
C91 C96 1.400(12) . ? 
C92 C93 1.398(12) . ? 
C93 C94 1.375(14) . ? 
C94 C95 1.360(15) . ? 
C95 C96 1.396(13) . ? 
C97 C102 1.380(12) . ? 
C97 C98 1.381(12) . ? 
C98 C99 1.382(13) . ? 
C99 C100 1.348(15) . ? 
C100 C101 1.371(14) . ? 
C101 C102 1.411(12) . ? 
C103 C104 1.371(11) . ? 
C103 C108 1.397(11) . ? 
C104 C105 1.394(11) . ? 
C105 C106 1.388(12) . ? 
C106 C107 1.377(12) . ? 
C107 C108 1.391(12) . ? 
C1S Cl1 1.721(13) . ? 
C1S Cl2 1.732(13) . ? 
C2S Cl4 1.746(12) . ? 
C2S Cl3 1.767(13) . ? 
C3S Cl5 1.760(11) . ? 
C3S Cl6 1.774(12) . ? 
C4S Cl8 1.658(19) . ? 
C4S Cl7 1.815(19) . ? 
C5S Cl9 1.737(17) . ? 
C5S Cl10 1.758(15) . ? 
C6S Cl12 1.736(13) . ? 
C6S Cl11 1.739(13) . ? 
  
loop_ 
 _geom_angle_atom_site_label_1 
 _geom_angle_atom_site_label_2 
 _geom_angle_atom_site_label_3 
 _geom_angle 
 _geom_angle_site_symmetry_1 
 _geom_angle_site_symmetry_3 
 _geom_angle_publ_flag 
P1 Au2 P3 118.51(14) . . ? 
P1 Au2 P5 119.73(13) . . ? 
P3 Au2 P5 119.21(13) . . ? 
P1 Au2 Tl1 94.10(8) . . ? 
P3 Au2 Tl1 96.24(9) . . ? 
P5 Au2 Tl1 95.64(9) . . ? 
P4 Au1 P2 126.9(6) . . ? 
P4 Au1 P6 117.1(5) . . ? 
P2 Au1 P6 114.5(5) . . ? 
P4 Au1 Tl1 92.0(3) . . ? 
P2 Au1 Tl1 97.7(3) . . ? 
P6 Au1 Tl1 92.2(3) . . ? 
P5 Pd2 P3 114.5(4) . . ? 
P5 Pd2 P1 121.9(5) . . ? 
P3 Pd2 P1 115.2(5) . . ? 
P5 Pd2 Tl1 100.8(3) . . ? 
P3 Pd2 Tl1 98.1(3) . . ? 
P1 Pd2 Tl1 100.1(3) . . ? 
P2 Pd1 P4 124.9(6) . . ? 
P2 Pd1 P6 109.9(5) . . ? 
P4 Pd1 P6 119.5(6) . . ? 
P2 Pd1 Tl1 99.5(4) . . ? 
P4 Pd1 Tl1 98.1(4) . . ? 
P6 Pd1 Tl1 96.1(4) . . ? 
Pd1 Tl1 Pd2 176.4(4) . . ? 
Pd1 Tl1 Au1 2.0(6) . . ? 
Pd2 Tl1 Au1 175.9(4) . . ? 
Pd1 Tl1 Au2 174.5(3) . . ? 
Pd2 Tl1 Au2 2.2(3) . . ? 
Au1 Tl1 Au2 173.7(3) . . ? 
C1 N1 C5 117.3(6) . . ? 
C10 N2 C6 118.1(6) . . ? 
C13 N3 C17 116.8(6) . . ? 
C22 N4 C18 118.3(6) . . ? 
C25 N5 C29 117.9(6) . . ? 
C34 N6 C30 117.8(6) . . ? 
C43 P1 C37 103.9(4) . . ? 
C43 P1 C1 104.4(4) . . ? 
C37 P1 C1 103.8(3) . . ? 
C43 P1 Au2 123.2(3) . . ? 
C37 P1 Au2 106.4(3) . . ? 
C1 P1 Au2 113.2(3) . . ? 
C43 P1 Pd2 119.3(4) . . ? 
C37 P1 Pd2 111.2(3) . . ? 
C1 P1 Pd2 112.7(4) . . ? 
Au2 P1 Pd2 5.1(2) . . ? 
C10 P2 C55 100.8(4) . . ? 
C10 P2 C49 105.5(3) . . ? 
C55 P2 C49 102.8(3) . . ? 
C10 P2 Pd1 112.5(4) . . ? 
C55 P2 Pd1 124.8(4) . . ? 
C49 P2 Pd1 108.6(3) . . ? 
C10 P2 Au1 113.4(4) . . ? 
C55 P2 Au1 127.4(4) . . ? 
C49 P2 Au1 104.8(3) . . ? 
Pd1 P2 Au1 3.8(3) . . ? 
C67 P3 C61 104.0(3) . . ? 
C67 P3 C13 106.3(3) . . ? 
C61 P3 C13 104.1(3) . . ? 
C67 P3 Au2 120.6(2) . . ? 
C61 P3 Au2 106.9(3) . . ? 
C13 P3 Au2 113.3(3) . . ? 
C67 P3 Pd2 118.5(3) . . ? 
C61 P3 Pd2 111.0(3) . . ? 
C13 P3 Pd2 111.8(4) . . ? 
Au2 P3 Pd2 4.0(2) . . ? 
C79 P4 C22 102.7(3) . . ? 
C79 P4 C73 103.3(4) . . ? 
C22 P4 C73 103.2(3) . . ? 
C79 P4 Au1 122.7(4) . . ? 
C22 P4 Au1 116.7(4) . . ? 
C73 P4 Au1 106.0(3) . . ? 
C79 P4 Pd1 120.0(4) . . ? 
C22 P4 Pd1 115.5(4) . . ? 
C73 P4 Pd1 110.3(3) . . ? 
Au1 P4 Pd1 4.4(3) . . ? 
C91 P5 C25 104.1(4) . . ? 
C91 P5 C85 103.0(4) . . ? 
C25 P5 C85 102.9(4) . . ? 
C91 P5 Pd2 122.0(4) . . ? 
C25 P5 Pd2 107.6(3) . . ? 
C85 P5 Pd2 115.1(3) . . ? 
C91 P5 Au2 121.6(3) . . ? 
C25 P5 Au2 112.2(2) . . ? 
C85 P5 Au2 111.1(3) . . ? 
Pd2 P5 Au2 5.2(2) . . ? 
C103 P6 C34 101.3(3) . . ? 
C103 P6 C97 103.2(4) . . ? 
C34 P6 C97 102.6(3) . . ? 
C103 P6 Au1 123.1(4) . . ? 
C34 P6 Au1 114.7(4) . . ? 
C97 P6 Au1 109.6(3) . . ? 
C103 P6 Pd1 123.7(4) . . ? 
C34 P6 Pd1 110.4(4) . . ? 
C97 P6 Pd1 113.1(3) . . ? 
Au1 P6 Pd1 4.7(4) . . ? 
N1 C1 C2 124.3(7) . . ? 
N1 C1 P1 115.1(5) . . ? 
C2 C1 P1 120.5(6) . . ? 
C3 C2 C1 118.0(8) . . ? 
C2 C3 C4 119.8(8) . . ? 
C3 C4 C5 118.2(7) . . ? 
C3 C4 C11 120.8(7) . . ? 
C5 C4 C11 121.0(7) . . ? 
N1 C5 C4 122.4(7) . . ? 
N1 C5 C6 119.6(6) . . ? 
C4 C5 C6 118.0(7) . . ? 
N2 C6 C7 122.7(7) . . ? 
N2 C6 C5 118.7(6) . . ? 
C7 C6 C5 118.6(7) . . ? 
C6 C7 C8 117.4(7) . . ? 
C6 C7 C12 120.9(7) . . ? 
C8 C7 C12 121.7(7) . . ? 
C9 C8 C7 119.5(7) . . ? 
C8 C9 C10 119.9(7) . . ? 
N2 C10 C9 122.5(7) . . ? 
N2 C10 P2 114.0(5) . . ? 
C9 C10 P2 123.5(6) . . ? 
C12 C11 C4 120.7(8) . . ? 
C11 C12 C7 120.7(7) . . ? 
N3 C13 C14 123.9(7) . . ? 
N3 C13 P3 114.0(5) . . ? 
C14 C13 P3 121.9(6) . . ? 
C15 C14 C13 119.6(8) . . ? 
C14 C15 C16 118.1(7) . . ? 
C15 C16 C17 118.6(7) . . ? 
C15 C16 C23 121.7(7) . . ? 
C17 C16 C23 119.8(7) . . ? 
N3 C17 C16 122.8(7) . . ? 
N3 C17 C18 117.8(6) . . ? 
C16 C17 C18 119.3(7) . . ? 
N4 C18 C19 122.2(7) . . ? 
N4 C18 C17 118.8(6) . . ? 
C19 C18 C17 119.0(7) . . ? 
C20 C19 C18 118.2(7) . . ? 
C20 C19 C24 122.0(7) . . ? 
C18 C19 C24 119.8(7) . . ? 
C21 C20 C19 119.7(7) . . ? 
C20 C21 C22 118.5(8) . . ? 
N4 C22 C21 122.9(7) . . ? 
N4 C22 P4 114.4(5) . . ? 
C21 C22 P4 122.5(6) . . ? 
C24 C23 C16 120.6(8) . . ? 
C23 C24 C19 121.4(8) . . ? 
N5 C25 C26 123.4(7) . . ? 
N5 C25 P5 114.9(5) . . ? 
C26 C25 P5 121.6(6) . . ? 
C27 C26 C25 118.9(7) . . ? 
C26 C27 C28 119.9(7) . . ? 
C27 C28 C29 118.7(7) . . ? 
C27 C28 C35 121.6(7) . . ? 
C29 C28 C35 119.7(7) . . ? 
N5 C29 C28 121.2(7) . . ? 
N5 C29 C30 120.2(7) . . ? 
C28 C29 C30 118.6(7) . . ? 
N6 C30 C31 121.6(7) . . ? 
N6 C30 C29 119.1(6) . . ? 
C31 C30 C29 119.3(7) . . ? 
C32 C31 C30 119.0(7) . . ? 
C32 C31 C36 121.2(7) . . ? 
C30 C31 C36 119.8(7) . . ? 
C33 C32 C31 119.5(7) . . ? 
C32 C33 C34 118.8(7) . . ? 
N6 C34 C33 123.1(7) . . ? 
N6 C34 P6 115.2(5) . . ? 
C33 C34 P6 121.6(6) . . ? 
C36 C35 C28 121.4(7) . . ? 
C35 C36 C31 121.0(7) . . ? 
C38 C37 C42 118.3(7) . . ? 
C38 C37 P1 118.2(6) . . ? 
C42 C37 P1 123.5(6) . . ? 
C37 C38 C39 121.1(8) . . ? 
C40 C39 C38 120.6(9) . . ? 
C39 C40 C41 119.2(8) . . ? 
C42 C41 C40 119.3(8) . . ? 
C41 C42 C37 121.5(9) . . ? 
C48 C43 C44 117.8(7) . . ? 
C48 C43 P1 119.8(6) . . ? 
C44 C43 P1 122.3(6) . . ? 
C43 C44 C45 120.8(8) . . ? 
C46 C45 C44 120.2(9) . . ? 
C45 C46 C47 120.3(9) . . ? 
C48 C47 C46 119.1(9) . . ? 
C47 C48 C43 121.7(8) . . ? 
C54 C49 C50 118.5(7) . . ? 
C54 C49 P2 123.0(6) . . ? 
C50 C49 P2 118.0(6) . . ? 
C51 C50 C49 120.4(7) . . ? 
C52 C51 C50 120.2(8) . . ? 
C53 C52 C51 120.6(8) . . ? 
C52 C53 C54 120.5(8) . . ? 
C49 C54 C53 119.9(8) . . ? 
C56 C55 C60 117.9(8) . . ? 
C56 C55 P2 123.8(6) . . ? 
C60 C55 P2 118.2(7) . . ? 
C55 C56 C57 121.6(10) . . ? 
C58 C57 C56 119.2(10) . . ? 
C59 C58 C57 120.4(9) . . ? 
C58 C59 C60 120.7(10) . . ? 
C55 C60 C59 120.1(10) . . ? 
C66 C61 C62 118.6(7) . . ? 
C66 C61 P3 117.2(6) . . ? 
C62 C61 P3 123.8(6) . . ? 
C63 C62 C61 120.0(8) . . ? 
C64 C63 C62 120.5(8) . . ? 
C63 C64 C65 119.8(8) . . ? 
C66 C65 C64 119.3(8) . . ? 
C65 C66 C61 121.8(8) . . ? 
C72 C67 C68 119.5(7) . . ? 
C72 C67 P3 117.8(6) . . ? 
C68 C67 P3 122.4(6) . . ? 
C67 C68 C69 118.9(8) . . ? 
C70 C69 C68 120.8(8) . . ? 
C69 C70 C71 120.3(8) . . ? 
C72 C71 C70 119.2(8) . . ? 
C71 C72 C67 121.1(8) . . ? 
C74 C73 C78 120.0(7) . . ? 
C74 C73 P4 122.9(6) . . ? 
C78 C73 P4 117.0(6) . . ? 
C73 C74 C75 119.7(9) . . ? 
C76 C75 C74 120.5(9) . . ? 
C75 C76 C77 119.9(9) . . ? 
C78 C77 C76 119.8(9) . . ? 
C77 C78 C73 120.0(9) . . ? 
C84 C79 C80 118.7(7) . . ? 
C84 C79 P4 123.4(6) . . ? 
C80 C79 P4 117.9(6) . . ? 
C79 C80 C81 120.9(8) . . ? 
C82 C81 C80 119.1(8) . . ? 
C81 C82 C83 120.8(8) . . ? 
C82 C83 C84 121.1(8) . . ? 
C79 C84 C83 119.4(8) . . ? 
C86 C85 C90 119.0(8) . . ? 
C86 C85 P5 123.2(8) . . ? 
C90 C85 P5 117.8(7) . . ? 
C85 C86 C87 119.9(11) . . ? 
C88 C87 C86 119.8(11) . . ? 
C89 C88 C87 121.5(10) . . ? 
C88 C89 C90 118.1(12) . . ? 
C85 C90 C89 121.6(10) . . ? 
C92 C91 C96 118.9(8) . . ? 
C92 C91 P5 122.3(6) . . ? 
C96 C91 P5 118.8(7) . . ? 
C91 C92 C93 120.3(9) . . ? 
C94 C93 C92 120.3(10) . . ? 
C95 C94 C93 120.5(9) . . ? 
C94 C95 C96 119.2(9) . . ? 
C95 C96 C91 120.8(10) . . ? 
C102 C97 C98 118.4(8) . . ? 
C102 C97 P6 116.8(6) . . ? 
C98 C97 P6 124.7(7) . . ? 
C97 C98 C99 121.0(9) . . ? 
C100 C99 C98 120.3(9) . . ? 
C99 C100 C101 120.9(9) . . ? 
C100 C101 C102 119.0(9) . . ? 
C97 C102 C101 120.3(8) . . ? 
C104 C103 C108 118.9(7) . . ? 
C104 C103 P6 120.9(6) . . ? 
C108 C103 P6 120.2(6) . . ? 
C103 C104 C105 120.5(8) . . ? 
C106 C105 C104 120.9(8) . . ? 
C107 C106 C105 118.5(8) . . ? 
C106 C107 C108 120.9(8) . . ? 
C107 C108 C103 120.3(8) . . ? 
Cl1 C1S Cl2 114.8(8) . . ? 
Cl4 C2S Cl3 112.3(7) . . ? 
Cl5 C3S Cl6 110.8(6) . . ? 
Cl8 C4S Cl7 113.1(11) . . ? 
Cl9 C5S Cl10 110.0(8) . . ? 
Cl12 C6S Cl11 112.2(7) . . ? 
  
loop_ 
 _geom_torsion_atom_site_label_1 
 _geom_torsion_atom_site_label_2 
 _geom_torsion_atom_site_label_3 
 _geom_torsion_atom_site_label_4 
 _geom_torsion 
 _geom_torsion_site_symmetry_1 
 _geom_torsion_site_symmetry_2 
 _geom_torsion_site_symmetry_3 
 _geom_torsion_site_symmetry_4 
 _geom_torsion_publ_flag 
P2 Pd1 Tl1 Pd2 -64(6) . . . . ? 
P4 Pd1 Tl1 Pd2 63(7) . . . . ? 
P6 Pd1 Tl1 Pd2 -176(21) . . . . ? 
P2 Pd1 Tl1 Au1 24(16) . . . . ? 
P4 Pd1 Tl1 Au1 152(17) . . . . ? 
P6 Pd1 Tl1 Au1 -87(16) . . . . ? 
P2 Pd1 Tl1 Au2 -53(3) . . . . ? 
P4 Pd1 Tl1 Au2 74(3) . . . . ? 
P6 Pd1 Tl1 Au2 -164(3) . . . . ? 
P5 Pd2 Tl1 Pd1 -77(6) . . . . ? 
P3 Pd2 Tl1 Pd1 40(7) . . . . ? 
P1 Pd2 Tl1 Pd1 158(6) . . . . ? 
P5 Pd2 Tl1 Au1 -106(5) . . . . ? 
P3 Pd2 Tl1 Au1 11(5) . . . . ? 
P1 Pd2 Tl1 Au1 128(5) . . . . ? 
P5 Pd2 Tl1 Au2 -107(9) . . . . ? 
P3 Pd2 Tl1 Au2 10(8) . . . . ? 
P1 Pd2 Tl1 Au2 128(9) . . . . ? 
P4 Au1 Tl1 Pd1 -27(16) . . . . ? 
P2 Au1 Tl1 Pd1 -155(17) . . . . ? 
P6 Au1 Tl1 Pd1 90(16) . . . . ? 
P4 Au1 Tl1 Pd2 94(5) . . . . ? 
P2 Au1 Tl1 Pd2 -34(5) . . . . ? 
P6 Au1 Tl1 Pd2 -149(5) . . . . ? 
P4 Au1 Tl1 Au2 94(2) . . . . ? 
P2 Au1 Tl1 Au2 -34(3) . . . . ? 
P6 Au1 Tl1 Au2 -149(2) . . . . ? 
P1 Au2 Tl1 Pd1 149(3) . . . . ? 
P3 Au2 Tl1 Pd1 29(3) . . . . ? 
P5 Au2 Tl1 Pd1 -91(3) . . . . ? 
P1 Au2 Tl1 Pd2 -50(8) . . . . ? 
P3 Au2 Tl1 Pd2 -169(9) . . . . ? 
P5 Au2 Tl1 Pd2 70(8) . . . . ? 
P1 Au2 Tl1 Au1 130(2) . . . . ? 
P3 Au2 Tl1 Au1 11(2) . . . . ? 
P5 Au2 Tl1 Au1 -109(2) . . . . ? 
P3 Au2 P1 C43 163.1(3) . . . . ? 
P5 Au2 P1 C43 -35.1(3) . . . . ? 
Tl1 Au2 P1 C43 63.7(3) . . . . ? 
P3 Au2 P1 C37 -77.3(3) . . . . ? 
P5 Au2 P1 C37 84.4(3) . . . . ? 
Tl1 Au2 P1 C37 -176.7(3) . . . . ? 
P3 Au2 P1 C1 36.1(3) . . . . ? 
P5 Au2 P1 C1 -162.2(3) . . . . ? 
Tl1 Au2 P1 C1 -63.3(3) . . . . ? 
P3 Au2 P1 Pd2 122(4) . . . . ? 
P5 Au2 P1 Pd2 -76(4) . . . . ? 
Tl1 Au2 P1 Pd2 23(4) . . . . ? 
P5 Pd2 P1 C43 -45.9(5) . . . . ? 
P3 Pd2 P1 C43 167.7(3) . . . . ? 
Tl1 Pd2 P1 C43 63.7(5) . . . . ? 
P5 Pd2 P1 C37 75.1(4) . . . . ? 
P3 Pd2 P1 C37 -71.3(5) . . . . ? 
Tl1 Pd2 P1 C37 -175.3(3) . . . . ? 
P5 Pd2 P1 C1 -168.8(3) . . . . ? 
P3 Pd2 P1 C1 44.8(4) . . . . ? 
Tl1 Pd2 P1 C1 -59.2(4) . . . . ? 
P5 Pd2 P1 Au2 95(4) . . . . ? 
P3 Pd2 P1 Au2 -51(4) . . . . ? 
Tl1 Pd2 P1 Au2 -155(4) . . . . ? 
P4 Pd1 P2 C10 -167.2(4) . . . . ? 
P6 Pd1 P2 C10 39.9(4) . . . . ? 
Tl1 Pd1 P2 C10 -60.3(5) . . . . ? 
P4 Pd1 P2 C55 -44.8(5) . . . . ? 
P6 Pd1 P2 C55 162.3(3) . . . . ? 
Tl1 Pd1 P2 C55 62.1(6) . . . . ? 
P4 Pd1 P2 C49 76.4(5) . . . . ? 
P6 Pd1 P2 C49 -76.5(4) . . . . ? 
Tl1 Pd1 P2 C49 -176.7(3) . . . . ? 
P4 Pd1 P2 Au1 89(10) . . . . ? 
P6 Pd1 P2 Au1 -64(10) . . . . ? 
Tl1 Pd1 P2 Au1 -164(10) . . . . ? 
P4 Au1 P2 C10 -161.3(3) . . . . ? 
P6 Au1 P2 C10 33.1(4) . . . . ? 
Tl1 Au1 P2 C10 -62.9(5) . . . . ? 
P4 Au1 P2 C55 -35.2(5) . . . . ? 
P6 Au1 P2 C55 159.1(3) . . . . ? 
Tl1 Au1 P2 C55 63.1(5) . . . . ? 
P4 Au1 P2 C49 84.2(4) . . . . ? 
P6 Au1 P2 C49 -81.5(3) . . . . ? 
Tl1 Au1 P2 C49 -177.4(3) . . . . ? 
P4 Au1 P2 Pd1 -84(10) . . . . ? 
P6 Au1 P2 Pd1 111(10) . . . . ? 
Tl1 Au1 P2 Pd1 15(10) . . . . ? 
P1 Au2 P3 C67 -32.9(3) . . . . ? 
P5 Au2 P3 C67 165.3(3) . . . . ? 
Tl1 Au2 P3 C67 65.3(3) . . . . ? 
P1 Au2 P3 C61 85.5(3) . . . . ? 
P5 Au2 P3 C61 -76.4(3) . . . . ? 
Tl1 Au2 P3 C61 -176.4(3) . . . . ? 
P1 Au2 P3 C13 -160.4(3) . . . . ? 
P5 Au2 P3 C13 37.8(3) . . . . ? 
Tl1 Au2 P3 C13 -62.3(3) . . . . ? 
P1 Au2 P3 Pd2 -92(5) . . . . ? 
P5 Au2 P3 Pd2 106(5) . . . . ? 
Tl1 Au2 P3 Pd2 6(5) . . . . ? 
P5 Pd2 P3 C67 169.6(3) . . . . ? 
P1 Pd2 P3 C67 -41.5(4) . . . . ? 
Tl1 Pd2 P3 C67 63.8(5) . . . . ? 
P5 Pd2 P3 C61 -70.2(4) . . . . ? 
P1 Pd2 P3 C61 78.8(4) . . . . ? 
Tl1 Pd2 P3 C61 -176.0(3) . . . . ? 
P5 Pd2 P3 C13 45.6(4) . . . . ? 
P1 Pd2 P3 C13 -165.5(3) . . . . ? 
Tl1 Pd2 P3 C13 -60.3(4) . . . . ? 
P5 Pd2 P3 Au2 -67(5) . . . . ? 
P1 Pd2 P3 Au2 82(5) . . . . ? 
Tl1 Pd2 P3 Au2 -173(5) . . . . ? 
P2 Au1 P4 C79 168.1(3) . . . . ? 
P6 Au1 P4 C79 -26.6(4) . . . . ? 
Tl1 Au1 P4 C79 66.9(5) . . . . ? 
P2 Au1 P4 C22 40.1(4) . . . . ? 
P6 Au1 P4 C22 -154.5(3) . . . . ? 
Tl1 Au1 P4 C22 -61.0(5) . . . . ? 
P2 Au1 P4 C73 -74.0(4) . . . . ? 
P6 Au1 P4 C73 91.3(3) . . . . ? 
Tl1 Au1 P4 C73 -175.2(3) . . . . ? 
P2 Au1 P4 Pd1 115(9) . . . . ? 
P6 Au1 P4 Pd1 -79(9) . . . . ? 
Tl1 Au1 P4 Pd1 14(8) . . . . ? 
P2 Pd1 P4 C79 173.5(4) . . . . ? 
P6 Pd1 P4 C79 -36.0(4) . . . . ? 
Tl1 Pd1 P4 C79 65.8(5) . . . . ? 
P2 Pd1 P4 C22 49.7(4) . . . . ? 
P6 Pd1 P4 C22 -159.7(3) . . . . ? 
Tl1 Pd1 P4 C22 -57.9(5) . . . . ? 
P2 Pd1 P4 C73 -66.8(5) . . . . ? 
P6 Pd1 P4 C73 83.8(4) . . . . ? 
Tl1 Pd1 P4 C73 -174.4(3) . . . . ? 
P2 Pd1 P4 Au1 -57(8) . . . . ? 
P6 Pd1 P4 Au1 94(9) . . . . ? 
Tl1 Pd1 P4 Au1 -165(9) . . . . ? 
P3 Pd2 P5 C91 -40.5(5) . . . . ? 
P1 Pd2 P5 C91 172.9(4) . . . . ? 
Tl1 Pd2 P5 C91 63.6(5) . . . . ? 
P3 Pd2 P5 C25 -160.5(3) . . . . ? 
P1 Pd2 P5 C25 53.0(4) . . . . ? 
Tl1 Pd2 P5 C25 -56.3(4) . . . . ? 
P3 Pd2 P5 C85 85.4(5) . . . . ? 
P1 Pd2 P5 C85 -61.2(5) . . . . ? 
Tl1 Pd2 P5 C85 -170.4(3) . . . . ? 
P3 Pd2 P5 Au2 46(3) . . . . ? 
P1 Pd2 P5 Au2 -101(4) . . . . ? 
Tl1 Pd2 P5 Au2 150(4) . . . . ? 
P1 Au2 P5 C91 167.3(3) . . . . ? 
P3 Au2 P5 C91 -31.1(3) . . . . ? 
Tl1 Au2 P5 C91 69.3(3) . . . . ? 
P1 Au2 P5 C25 43.3(3) . . . . ? 
P3 Au2 P5 C25 -155.1(3) . . . . ? 
Tl1 Au2 P5 C25 -54.7(3) . . . . ? 
P1 Au2 P5 C85 -71.3(3) . . . . ? 
P3 Au2 P5 C85 90.3(3) . . . . ? 
Tl1 Au2 P5 C85 -169.3(3) . . . . ? 
P1 Au2 P5 Pd2 70(4) . . . . ? 
P3 Au2 P5 Pd2 -128(4) . . . . ? 
Tl1 Au2 P5 Pd2 -28(4) . . . . ? 
P4 Au1 P6 C103 163.5(3) . . . . ? 
P2 Au1 P6 C103 -29.3(4) . . . . ? 
Tl1 Au1 P6 C103 70.1(5) . . . . ? 
P4 Au1 P6 C34 39.8(4) . . . . ? 
P2 Au1 P6 C34 -153.1(3) . . . . ? 
Tl1 Au1 P6 C34 -53.6(5) . . . . ? 
P4 Au1 P6 C97 -75.0(4) . . . . ? 
P2 Au1 P6 C97 92.1(4) . . . . ? 
Tl1 Au1 P6 C97 -168.4(3) . . . . ? 
P4 Au1 P6 Pd1 64(7) . . . . ? 
P2 Au1 P6 Pd1 -129(7) . . . . ? 
Tl1 Au1 P6 Pd1 -30(7) . . . . ? 
P2 Pd1 P6 C103 -37.6(4) . . . . ? 
P4 Pd1 P6 C103 167.8(3) . . . . ? 
Tl1 Pd1 P6 C103 64.9(5) . . . . ? 
P2 Pd1 P6 C34 -157.6(3) . . . . ? 
P4 Pd1 P6 C34 47.8(4) . . . . ? 
Tl1 Pd1 P6 C34 -55.1(5) . . . . ? 
P2 Pd1 P6 C97 88.1(4) . . . . ? 
P4 Pd1 P6 C97 -66.5(4) . . . . ? 
Tl1 Pd1 P6 C97 -169.4(3) . . . . ? 
P2 Pd1 P6 Au1 46(7) . . . . ? 
P4 Pd1 P6 Au1 -109(7) . . . . ? 
Tl1 Pd1 P6 Au1 148(8) . . . . ? 
C5 N1 C1 C2 1.0(11) . . . . ? 
C5 N1 C1 P1 -177.9(5) . . . . ? 
C43 P1 C1 N1 -94.5(6) . . . . ? 
C37 P1 C1 N1 156.8(6) . . . . ? 
Au2 P1 C1 N1 41.9(6) . . . . ? 
Pd2 P1 C1 N1 36.4(7) . . . . ? 
C43 P1 C1 C2 86.5(7) . . . . ? 
C37 P1 C1 C2 -22.1(8) . . . . ? 
Au2 P1 C1 C2 -137.1(6) . . . . ? 
Pd2 P1 C1 C2 -142.6(6) . . . . ? 
N1 C1 C2 C3 -0.6(13) . . . . ? 
P1 C1 C2 C3 178.3(7) . . . . ? 
C1 C2 C3 C4 0.9(13) . . . . ? 
C2 C3 C4 C5 -1.7(13) . . . . ? 
C2 C3 C4 C11 179.9(8) . . . . ? 
C1 N1 C5 C4 -1.8(11) . . . . ? 
C1 N1 C5 C6 177.9(6) . . . . ? 
C3 C4 C5 N1 2.2(12) . . . . ? 
C11 C4 C5 N1 -179.4(7) . . . . ? 
C3 C4 C5 C6 -177.5(7) . . . . ? 
C11 C4 C5 C6 0.9(11) . . . . ? 
C10 N2 C6 C7 0.8(10) . . . . ? 
C10 N2 C6 C5 -178.4(6) . . . . ? 
N1 C5 C6 N2 -0.6(10) . . . . ? 
C4 C5 C6 N2 179.1(7) . . . . ? 
N1 C5 C6 C7 -179.9(6) . . . . ? 
C4 C5 C6 C7 -0.1(10) . . . . ? 
N2 C6 C7 C8 -0.9(11) . . . . ? 
C5 C6 C7 C8 178.3(7) . . . . ? 
N2 C6 C7 C12 178.9(7) . . . . ? 
C5 C6 C7 C12 -1.8(11) . . . . ? 
C6 C7 C8 C9 1.0(11) . . . . ? 
C12 C7 C8 C9 -178.9(7) . . . . ? 
C7 C8 C9 C10 -0.9(11) . . . . ? 
C6 N2 C10 C9 -0.8(10) . . . . ? 
C6 N2 C10 P2 177.5(5) . . . . ? 
C8 C9 C10 N2 0.9(11) . . . . ? 
C8 C9 C10 P2 -177.2(6) . . . . ? 
C55 P2 C10 N2 -97.4(6) . . . . ? 
C49 P2 C10 N2 155.9(5) . . . . ? 
Pd1 P2 C10 N2 37.7(6) . . . . ? 
Au1 P2 C10 N2 41.7(6) . . . . ? 
C55 P2 C10 C9 80.8(7) . . . . ? 
C49 P2 C10 C9 -25.9(7) . . . . ? 
Pd1 P2 C10 C9 -144.1(6) . . . . ? 
Au1 P2 C10 C9 -140.0(6) . . . . ? 
C3 C4 C11 C12 178.8(9) . . . . ? 
C5 C4 C11 C12 0.5(13) . . . . ? 
C4 C11 C12 C7 -2.5(13) . . . . ? 
C6 C7 C12 C11 3.2(12) . . . . ? 
C8 C7 C12 C11 -176.9(8) . . . . ? 
C17 N3 C13 C14 2.5(11) . . . . ? 
C17 N3 C13 P3 -171.9(5) . . . . ? 
C67 P3 C13 N3 -103.2(6) . . . . ? 
C61 P3 C13 N3 147.4(5) . . . . ? 
Au2 P3 C13 N3 31.6(6) . . . . ? 
Pd2 P3 C13 N3 27.5(6) . . . . ? 
C67 P3 C13 C14 82.3(7) . . . . ? 
C61 P3 C13 C14 -27.2(8) . . . . ? 
Au2 P3 C13 C14 -143.0(6) . . . . ? 
Pd2 P3 C13 C14 -147.0(6) . . . . ? 
N3 C13 C14 C15 -1.4(13) . . . . ? 
P3 C13 C14 C15 172.6(7) . . . . ? 
C13 C14 C15 C16 -2.4(13) . . . . ? 
C14 C15 C16 C17 4.7(12) . . . . ? 
C14 C15 C16 C23 -175.1(8) . . . . ? 
C13 N3 C17 C16 0.1(10) . . . . ? 
C13 N3 C17 C18 -179.1(6) . . . . ? 
C15 C16 C17 N3 -3.7(11) . . . . ? 
C23 C16 C17 N3 176.1(7) . . . . ? 
C15 C16 C17 C18 175.5(7) . . . . ? 
C23 C16 C17 C18 -4.6(11) . . . . ? 
C22 N4 C18 C19 -0.4(11) . . . . ? 
C22 N4 C18 C17 176.8(6) . . . . ? 
N3 C17 C18 N4 6.1(10) . . . . ? 
C16 C17 C18 N4 -173.2(7) . . . . ? 
N3 C17 C18 C19 -176.6(7) . . . . ? 
C16 C17 C18 C19 4.1(10) . . . . ? 
N4 C18 C19 C20 -2.9(11) . . . . ? 
C17 C18 C19 C20 179.9(7) . . . . ? 
N4 C18 C19 C24 175.9(7) . . . . ? 
C17 C18 C19 C24 -1.3(11) . . . . ? 
C18 C19 C20 C21 3.2(12) . . . . ? 
C24 C19 C20 C21 -175.6(8) . . . . ? 
C19 C20 C21 C22 -0.4(12) . . . . ? 
C18 N4 C22 C21 3.5(11) . . . . ? 
C18 N4 C22 P4 -172.1(5) . . . . ? 
C20 C21 C22 N4 -3.1(12) . . . . ? 
C20 C21 C22 P4 172.2(6) . . . . ? 
C79 P4 C22 N4 -104.8(6) . . . . ? 
C73 P4 C22 N4 148.0(6) . . . . ? 
Au1 P4 C22 N4 32.3(7) . . . . ? 
Pd1 P4 C22 N4 27.6(7) . . . . ? 
C79 P4 C22 C21 79.5(7) . . . . ? 
C73 P4 C22 C21 -27.6(7) . . . . ? 
Au1 P4 C22 C21 -143.4(6) . . . . ? 
Pd1 P4 C22 C21 -148.1(6) . . . . ? 
C15 C16 C23 C24 -177.8(8) . . . . ? 
C17 C16 C23 C24 2.4(12) . . . . ? 
C16 C23 C24 C19 0.5(13) . . . . ? 
C20 C19 C24 C23 177.8(8) . . . . ? 
C18 C19 C24 C23 -1.0(12) . . . . ? 
C29 N5 C25 C26 2.9(11) . . . . ? 
C29 N5 C25 P5 -172.5(5) . . . . ? 
C91 P5 C25 N5 -102.8(6) . . . . ? 
C85 P5 C25 N5 150.0(6) . . . . ? 
Pd2 P5 C25 N5 28.0(7) . . . . ? 
Au2 P5 C25 N5 30.5(6) . . . . ? 
C91 P5 C25 C26 81.8(7) . . . . ? 
C85 P5 C25 C26 -25.4(8) . . . . ? 
Pd2 P5 C25 C26 -147.4(6) . . . . ? 
Au2 P5 C25 C26 -145.0(6) . . . . ? 
N5 C25 C26 C27 -2.6(13) . . . . ? 
P5 C25 C26 C27 172.4(7) . . . . ? 
C25 C26 C27 C28 -0.2(13) . . . . ? 
C26 C27 C28 C29 2.4(13) . . . . ? 
C26 C27 C28 C35 -176.5(8) . . . . ? 
C25 N5 C29 C28 -0.5(10) . . . . ? 
C25 N5 C29 C30 176.9(7) . . . . ? 
C27 C28 C29 N5 -2.1(11) . . . . ? 
C35 C28 C29 N5 176.8(7) . . . . ? 
C27 C28 C29 C30 -179.5(7) . . . . ? 
C35 C28 C29 C30 -0.6(11) . . . . ? 
C34 N6 C30 C31 -0.1(10) . . . . ? 
C34 N6 C30 C29 178.0(6) . . . . ? 
N5 C29 C30 N6 8.2(10) . . . . ? 
C28 C29 C30 N6 -174.3(7) . . . . ? 
N5 C29 C30 C31 -173.7(6) . . . . ? 
C28 C29 C30 C31 3.7(10) . . . . ? 
N6 C30 C31 C32 -3.6(11) . . . . ? 
C29 C30 C31 C32 178.4(7) . . . . ? 
N6 C30 C31 C36 174.6(7) . . . . ? 
C29 C30 C31 C36 -3.4(10) . . . . ? 
C30 C31 C32 C33 3.9(11) . . . . ? 
C36 C31 C32 C33 -174.3(7) . . . . ? 
C31 C32 C33 C34 -0.6(12) . . . . ? 
C30 N6 C34 C33 3.5(10) . . . . ? 
C30 N6 C34 P6 -172.2(5) . . . . ? 
C32 C33 C34 N6 -3.2(12) . . . . ? 
C32 C33 C34 P6 172.3(6) . . . . ? 
C103 P6 C34 N6 -106.5(6) . . . . ? 
C97 P6 C34 N6 147.1(6) . . . . ? 
Au1 P6 C34 N6 28.3(7) . . . . ? 
Pd1 P6 C34 N6 26.3(7) . . . . ? 
C103 P6 C34 C33 77.7(7) . . . . ? 
C97 P6 C34 C33 -28.8(7) . . . . ? 
Au1 P6 C34 C33 -147.5(6) . . . . ? 
Pd1 P6 C34 C33 -149.6(6) . . . . ? 
C27 C28 C35 C36 175.8(8) . . . . ? 
C29 C28 C35 C36 -3.0(12) . . . . ? 
C28 C35 C36 C31 3.4(12) . . . . ? 
C32 C31 C36 C35 178.0(8) . . . . ? 
C30 C31 C36 C35 -0.2(12) . . . . ? 
C43 P1 C37 C38 166.8(6) . . . . ? 
C1 P1 C37 C38 -84.2(7) . . . . ? 
Au2 P1 C37 C38 35.4(7) . . . . ? 
Pd2 P1 C37 C38 37.2(8) . . . . ? 
C43 P1 C37 C42 -12.2(8) . . . . ? 
C1 P1 C37 C42 96.7(8) . . . . ? 
Au2 P1 C37 C42 -143.6(7) . . . . ? 
Pd2 P1 C37 C42 -141.8(7) . . . . ? 
C42 C37 C38 C39 -1.0(12) . . . . ? 
P1 C37 C38 C39 179.9(6) . . . . ? 
C37 C38 C39 C40 0.9(13) . . . . ? 
C38 C39 C40 C41 -0.7(14) . . . . ? 
C39 C40 C41 C42 0.7(15) . . . . ? 
C40 C41 C42 C37 -0.9(15) . . . . ? 
C38 C37 C42 C41 1.1(14) . . . . ? 
P1 C37 C42 C41 -179.9(8) . . . . ? 
C37 P1 C43 C48 -70.2(7) . . . . ? 
C1 P1 C43 C48 -178.8(6) . . . . ? 
Au2 P1 C43 C48 50.5(7) . . . . ? 
Pd2 P1 C43 C48 54.3(7) . . . . ? 
C37 P1 C43 C44 110.0(7) . . . . ? 
C1 P1 C43 C44 1.5(8) . . . . ? 
Au2 P1 C43 C44 -129.3(6) . . . . ? 
Pd2 P1 C43 C44 -125.5(7) . . . . ? 
C48 C43 C44 C45 -2.3(12) . . . . ? 
P1 C43 C44 C45 177.5(6) . . . . ? 
C43 C44 C45 C46 2.2(13) . . . . ? 
C44 C45 C46 C47 -0.3(14) . . . . ? 
C45 C46 C47 C48 -1.2(14) . . . . ? 
C46 C47 C48 C43 1.1(13) . . . . ? 
C44 C43 C48 C47 0.7(12) . . . . ? 
P1 C43 C48 C47 -179.1(7) . . . . ? 
C10 P2 C49 C54 111.0(7) . . . . ? 
C55 P2 C49 C54 5.8(8) . . . . ? 
Pd1 P2 C49 C54 -128.1(7) . . . . ? 
Au1 P2 C49 C54 -129.0(7) . . . . ? 
C10 P2 C49 C50 -77.2(7) . . . . ? 
C55 P2 C49 C50 177.6(6) . . . . ? 
Pd1 P2 C49 C50 43.7(7) . . . . ? 
Au1 P2 C49 C50 42.8(7) . . . . ? 
C54 C49 C50 C51 -0.5(12) . . . . ? 
P2 C49 C50 C51 -172.7(6) . . . . ? 
C49 C50 C51 C52 0.3(12) . . . . ? 
C50 C51 C52 C53 -0.5(13) . . . . ? 
C51 C52 C53 C54 0.9(14) . . . . ? 
C50 C49 C54 C53 0.9(12) . . . . ? 
P2 C49 C54 C53 172.7(7) . . . . ? 
C52 C53 C54 C49 -1.1(14) . . . . ? 
C10 P2 C55 C56 -31.8(8) . . . . ? 
C49 P2 C55 C56 77.0(8) . . . . ? 
Pd1 P2 C55 C56 -159.3(7) . . . . ? 
Au1 P2 C55 C56 -162.8(7) . . . . ? 
C10 P2 C55 C60 147.4(7) . . . . ? 
C49 P2 C55 C60 -103.8(8) . . . . ? 
Pd1 P2 C55 C60 19.9(9) . . . . ? 
Au1 P2 C55 C60 16.5(9) . . . . ? 
C60 C55 C56 C57 1.4(15) . . . . ? 
P2 C55 C56 C57 -179.4(8) . . . . ? 
C55 C56 C57 C58 -1.8(17) . . . . ? 
C56 C57 C58 C59 1.2(18) . . . . ? 
C57 C58 C59 C60 -0.1(19) . . . . ? 
C56 C55 C60 C59 -0.3(16) . . . . ? 
P2 C55 C60 C59 -179.6(9) . . . . ? 
C58 C59 C60 C55 -0.3(19) . . . . ? 
C67 P3 C61 C66 162.6(6) . . . . ? 
C13 P3 C61 C66 -86.2(6) . . . . ? 
Au2 P3 C61 C66 33.9(6) . . . . ? 
Pd2 P3 C61 C66 34.1(7) . . . . ? 
C67 P3 C61 C62 -9.6(7) . . . . ? 
C13 P3 C61 C62 101.5(7) . . . . ? 
Au2 P3 C61 C62 -138.3(6) . . . . ? 
Pd2 P3 C61 C62 -138.1(7) . . . . ? 
C66 C61 C62 C63 -0.7(12) . . . . ? 
P3 C61 C62 C63 171.5(6) . . . . ? 
C61 C62 C63 C64 -0.6(13) . . . . ? 
C62 C63 C64 C65 2.3(14) . . . . ? 
C63 C64 C65 C66 -2.8(13) . . . . ? 
C64 C65 C66 C61 1.6(13) . . . . ? 
C62 C61 C66 C65 0.1(12) . . . . ? 
P3 C61 C66 C65 -172.5(6) . . . . ? 
C61 P3 C67 C72 -60.3(6) . . . . ? 
C13 P3 C67 C72 -169.8(6) . . . . ? 
Au2 P3 C67 C72 59.5(7) . . . . ? 
Pd2 P3 C67 C72 63.5(7) . . . . ? 
C61 P3 C67 C68 125.0(6) . . . . ? 
C13 P3 C67 C68 15.4(7) . . . . ? 
Au2 P3 C67 C68 -115.2(6) . . . . ? 
Pd2 P3 C67 C68 -111.3(6) . . . . ? 
C72 C67 C68 C69 2.5(11) . . . . ? 
P3 C67 C68 C69 177.1(6) . . . . ? 
C67 C68 C69 C70 -1.1(12) . . . . ? 
C68 C69 C70 C71 0.4(13) . . . . ? 
C69 C70 C71 C72 -1.2(12) . . . . ? 
C70 C71 C72 C67 2.6(12) . . . . ? 
C68 C67 C72 C71 -3.3(11) . . . . ? 
P3 C67 C72 C71 -178.2(6) . . . . ? 
C79 P4 C73 C74 -10.6(8) . . . . ? 
C22 P4 C73 C74 96.1(7) . . . . ? 
Au1 P4 C73 C74 -140.8(7) . . . . ? 
Pd1 P4 C73 C74 -140.0(7) . . . . ? 
C79 P4 C73 C78 166.1(6) . . . . ? 
C22 P4 C73 C78 -87.2(7) . . . . ? 
Au1 P4 C73 C78 35.9(7) . . . . ? 
Pd1 P4 C73 C78 36.7(8) . . . . ? 
C78 C73 C74 C75 -0.3(13) . . . . ? 
P4 C73 C74 C75 176.3(7) . . . . ? 
C73 C74 C75 C76 0.6(15) . . . . ? 
C74 C75 C76 C77 0.5(15) . . . . ? 
C75 C76 C77 C78 -2.0(15) . . . . ? 
C76 C77 C78 C73 2.3(14) . . . . ? 
C74 C73 C78 C77 -1.2(13) . . . . ? 
P4 C73 C78 C77 -178.0(7) . . . . ? 
C22 P4 C79 C84 2.9(8) . . . . ? 
C73 P4 C79 C84 110.0(7) . . . . ? 
Au1 P4 C79 C84 -130.9(7) . . . . ? 
Pd1 P4 C79 C84 -126.8(7) . . . . ? 
C22 P4 C79 C80 -178.2(6) . . . . ? 
C73 P4 C79 C80 -71.1(6) . . . . ? 
Au1 P4 C79 C80 48.1(7) . . . . ? 
Pd1 P4 C79 C80 52.1(7) . . . . ? 
C84 C79 C80 C81 0.3(12) . . . . ? 
P4 C79 C80 C81 -178.7(6) . . . . ? 
C79 C80 C81 C82 0.1(12) . . . . ? 
C80 C81 C82 C83 0.4(13) . . . . ? 
C81 C82 C83 C84 -1.4(15) . . . . ? 
C80 C79 C84 C83 -1.3(12) . . . . ? 
P4 C79 C84 C83 177.7(7) . . . . ? 
C82 C83 C84 C79 1.9(14) . . . . ? 
C91 P5 C85 C86 -18.6(9) . . . . ? 
C25 P5 C85 C86 89.4(8) . . . . ? 
Pd2 P5 C85 C86 -153.8(7) . . . . ? 
Au2 P5 C85 C86 -150.3(7) . . . . ? 
C91 P5 C85 C90 160.8(7) . . . . ? 
C25 P5 C85 C90 -91.2(8) . . . . ? 
Pd2 P5 C85 C90 25.6(8) . . . . ? 
Au2 P5 C85 C90 29.1(8) . . . . ? 
C90 C85 C86 C87 -0.5(14) . . . . ? 
P5 C85 C86 C87 178.9(8) . . . . ? 
C85 C86 C87 C88 0.9(16) . . . . ? 
C86 C87 C88 C89 -0.1(19) . . . . ? 
C87 C88 C89 C90 -0.8(19) . . . . ? 
C86 C85 C90 C89 -0.5(15) . . . . ? 
P5 C85 C90 C89 -179.9(8) . . . . ? 
C88 C89 C90 C85 1.2(17) . . . . ? 
C25 P5 C91 C92 10.2(8) . . . . ? 
C85 P5 C91 C92 117.3(7) . . . . ? 
Pd2 P5 C91 C92 -111.4(7) . . . . ? 
Au2 P5 C91 C92 -117.5(7) . . . . ? 
C25 P5 C91 C96 -169.8(7) . . . . ? 
C85 P5 C91 C96 -62.6(7) . . . . ? 
Pd2 P5 C91 C96 68.6(7) . . . . ? 
Au2 P5 C91 C96 62.5(7) . . . . ? 
C96 C91 C92 C93 -0.3(13) . . . . ? 
P5 C91 C92 C93 179.7(7) . . . . ? 
C91 C92 C93 C94 1.8(14) . . . . ? 
C92 C93 C94 C95 -2.3(15) . . . . ? 
C93 C94 C95 C96 1.3(15) . . . . ? 
C94 C95 C96 C91 0.2(14) . . . . ? 
C92 C91 C96 C95 -0.7(13) . . . . ? 
P5 C91 C96 C95 179.3(7) . . . . ? 
C103 P6 C97 C102 163.2(6) . . . . ? 
C34 P6 C97 C102 -91.9(7) . . . . ? 
Au1 P6 C97 C102 30.4(8) . . . . ? 
Pd1 P6 C97 C102 27.1(8) . . . . ? 
C103 P6 C97 C98 -19.2(8) . . . . ? 
C34 P6 C97 C98 85.7(8) . . . . ? 
Au1 P6 C97 C98 -152.0(8) . . . . ? 
Pd1 P6 C97 C98 -155.3(8) . . . . ? 
C102 C97 C98 C99 0.9(14) . . . . ? 
P6 C97 C98 C99 -176.6(8) . . . . ? 
C97 C98 C99 C100 0.4(16) . . . . ? 
C98 C99 C100 C101 -0.5(17) . . . . ? 
C99 C100 C101 C102 -0.8(15) . . . . ? 
C98 C97 C102 C101 -2.2(13) . . . . ? 
P6 C97 C102 C101 175.5(7) . . . . ? 
C100 C101 C102 C97 2.2(13) . . . . ? 
C34 P6 C103 C104 23.2(7) . . . . ? 
C97 P6 C103 C104 129.2(6) . . . . ? 
Au1 P6 C103 C104 -106.4(6) . . . . ? 
Pd1 P6 C103 C104 -100.9(7) . . . . ? 
C34 P6 C103 C108 -160.0(6) . . . . ? 
C97 P6 C103 C108 -54.0(7) . . . . ? 
Au1 P6 C103 C108 70.3(7) . . . . ? 
Pd1 P6 C103 C108 75.9(7) . . . . ? 
C108 C103 C104 C105 1.2(12) . . . . ? 
P6 C103 C104 C105 178.0(6) . . . . ? 
C103 C104 C105 C106 -0.5(13) . . . . ? 
C104 C105 C106 C107 -0.4(13) . . . . ? 
C105 C106 C107 C108 0.5(13) . . . . ? 
C106 C107 C108 C103 0.1(14) . . . . ? 
C104 C103 C108 C107 -1.0(12) . . . . ? 
P6 C103 C108 C107 -177.9(7) . . . . ? 
  
_diffrn_measured_fraction_theta_max    0.997 
_diffrn_reflns_theta_full              26.37 
_diffrn_measured_fraction_theta_full   0.997 
_refine_diff_density_max    2.668 
_refine_diff_density_min   -2.028 
_refine_diff_density_rms    0.190 
#===END
 
data_unr06 
 
_audit_creation_method            SHELXL-97 
_chemical_name_systematic 
; 
 ? 
; 
_chemical_name_common             2�(PF6)2�3CHCl3�6H2O 
_chemical_melting_point           ? 
_chemical_formula_moiety          ? 
_chemical_formula_sum 
 'C111 H93 Au Cl9 F12 N6 O6 P8 Pt Tl' 
_chemical_formula_weight          2998.15 
 
loop_ 
 _atom_type_symbol 
 _atom_type_description 
 _atom_type_scat_dispersion_real 
 _atom_type_scat_dispersion_imag 
 _atom_type_scat_source 
 'C'  'C'   0.0033   0.0016 
 'International Tables Vol C Tables 4.2.6.8 and 6.1.1.4' 
 'H'  'H'   0.0000   0.0000 
 'International Tables Vol C Tables 4.2.6.8 and 6.1.1.4' 
 'N'  'N'   0.0061   0.0033 
 'International Tables Vol C Tables 4.2.6.8 and 6.1.1.4' 
 'F'  'F'   0.0171   0.0103 
 'International Tables Vol C Tables 4.2.6.8 and 6.1.1.4' 
 'P'  'P'   0.1023   0.0942 
 'International Tables Vol C Tables 4.2.6.8 and 6.1.1.4' 
 'Cl'  'Cl'   0.1484   0.1585 
 'International Tables Vol C Tables 4.2.6.8 and 6.1.1.4' 
 'Pt'  'Pt'  -1.7033   8.3905 
 'International Tables Vol C Tables 4.2.6.8 and 6.1.1.4' 
 'Au'  'Au'  -2.0133   8.8022 
 'International Tables Vol C Tables 4.2.6.8 and 6.1.1.4' 
 'Tl'  'Tl'  -2.8358   9.6688 
 'International Tables Vol C Tables 4.2.6.8 and 6.1.1.4' 
 'O'  'O'   0.0106   0.0060 
 'International Tables Vol C Tables 4.2.6.8 and 6.1.1.4' 
 
_symmetry_cell_setting            Monoclinic	 
_symmetry_space_group_name_H-M    P2(1)/n 
 
loop_ 
 _symmetry_equiv_pos_as_xyz 
 'x, y, z' 
 '-x+1/2, y+1/2, -z+1/2' 
 '-x, -y, -z' 
 'x-1/2, -y-1/2, z-1/2' 
 
_cell_length_a                    19.1672(10) 
_cell_length_b                    30.7091(17) 
_cell_length_c                    19.2514(11) 
_cell_angle_alpha                 90.00 
_cell_angle_beta                  95.584(2) 
_cell_angle_gamma                 90.00 
_cell_volume                      11277.7(11) 
_cell_formula_units_Z             4 
_cell_measurement_temperature     100(2) 
_cell_measurement_reflns_used     ? 
_cell_measurement_theta_min       ? 
_cell_measurement_theta_max       ? 
 
_exptl_crystal_description        ? 
_exptl_crystal_colour             ? 
_exptl_crystal_size_max           0.64 
_exptl_crystal_size_mid           0.64 
_exptl_crystal_size_min           0.25 
_exptl_crystal_density_meas       ? 
_exptl_crystal_density_diffrn     1.766 
_exptl_crystal_density_method     'not measured' 
_exptl_crystal_F_000              5872 
_exptl_absorpt_coefficient_mu     4.364 
_exptl_absorpt_correction_type    SADABS
_exptl_absorpt_correction_T_min   0.1651 
_exptl_absorpt_correction_T_max   0.4084 
_exptl_absorpt_process_details    ? 
 
_exptl_special_details 
; 
 ? 
; 
 
_diffrn_ambient_temperature       100(2) 
_diffrn_radiation_wavelength      0.71073 
_diffrn_radiation_type            MoK\a 
_diffrn_radiation_source          'fine-focus sealed tube' 
_diffrn_radiation_monochromator   graphite 
_diffrn_measurement_device_type   'CCD area detector' 
_diffrn_measurement_method        'phi and omega scans'
_diffrn_detector_area_resol_mean  ? 
_diffrn_standards_number          ? 
_diffrn_standards_interval_count  ? 
_diffrn_standards_interval_time   ? 
_diffrn_standards_decay_%         ? 
_diffrn_reflns_number             89160 
_diffrn_reflns_av_R_equivalents   0.0456 
_diffrn_reflns_av_sigmaI/netI     0.0403 
_diffrn_reflns_limit_h_min        -22 
_diffrn_reflns_limit_h_max        22 
_diffrn_reflns_limit_k_min        -36 
_diffrn_reflns_limit_k_max        36 
_diffrn_reflns_limit_l_min        -22 
_diffrn_reflns_limit_l_max        22 
_diffrn_reflns_theta_min          2.06 
_diffrn_reflns_theta_max          25.00 
_reflns_number_total              19831 
_reflns_number_gt                 18602 
_reflns_threshold_expression      >2sigma(I) 
 
_computing_data_collection        'Bruker SMART' 
_computing_cell_refinement        'Bruker SMART' 
_computing_data_reduction         'Bruker SAINT' 
_computing_structure_solution     'SHELXS-97 (Sheldrick, 1990)' 
_computing_structure_refinement   'SHELXL-97 (Sheldrick, 1997)' 
_computing_molecular_graphics     'Bruker SHELXTL' 
_computing_publication_material   'Bruker SHELXTL' 
 
_refine_special_details 
; 
 Refinement of F^2^ against ALL reflections.  The weighted R-factor wR and 
 goodness of fit S are based on F^2^, conventional R-factors R are based 
 on F, with F set to zero for negative F^2^. The threshold expression of 
 F^2^ > 2sigma(F^2^) is used only for calculating R-factors(gt) etc. and is 
 not relevant to the choice of reflections for refinement.  R-factors based 
 on F^2^ are statistically about twice as large as those based on F, and R- 
 factors based on ALL data will be even larger. 
; 
 
_refine_ls_structure_factor_coef  Fsqd  
_refine_ls_matrix_type            full 
_refine_ls_weighting_scheme       calc  
_refine_ls_weighting_details 
 'calc w=1/[\s^2^(Fo^2^)+(0.0000P)^2^+280.0298P] where P=(Fo^2^+2Fc^2^)/3' 
_atom_sites_solution_primary      direct 
_atom_sites_solution_secondary    difmap 
_atom_sites_solution_hydrogens    geom 
_refine_ls_hydrogen_treatment     mixed 
_refine_ls_extinction_method      none 
_refine_ls_extinction_coef        ? 
_refine_ls_number_reflns          19831 
_refine_ls_number_parameters      1464 
_refine_ls_number_restraints      184 
_refine_ls_R_factor_all           0.0720 
_refine_ls_R_factor_gt            0.0686 
_refine_ls_wR_factor_ref          0.1624 
_refine_ls_wR_factor_gt           0.1606 
_refine_ls_goodness_of_fit_ref    1.210 
_refine_ls_restrained_S_all       1.206 
_refine_ls_shift/su_max           0.007 
_refine_ls_shift/su_mean          0.000 
 
loop_ 
 _atom_site_label 
 _atom_site_type_symbol 
 _atom_site_fract_x 
 _atom_site_fract_y 
 _atom_site_fract_z 
 _atom_site_U_iso_or_equiv 
 _atom_site_adp_type 
 _atom_site_occupancy 
 _atom_site_symmetry_multiplicity 
 _atom_site_calc_flag 
 _atom_site_refinement_flags 
 _atom_site_disorder_assembly 
 _atom_site_disorder_group 
Pt1 Pt 0.951196(19) 0.168524(12) 0.47198(2) 0.01862(10) Uani 1 1 d . . . 
Au1 Au 0.696477(19) 0.260729(13) 0.47968(2) 0.02234(10) Uani 1 1 d . . . 
Tl1 Tl 0.82993(3) 0.215769(17) 0.48474(3) 0.04121(13) Uani 1 1 d . . . 
P1 P 0.90172(13) 0.11677(8) 0.39589(13) 0.0200(5) Uani 1 1 d . . . 
P2 P 0.72126(14) 0.31575(9) 0.40270(14) 0.0243(6) Uani 1 1 d . . . 
P3 P 1.01227(13) 0.22544(8) 0.42800(14) 0.0204(5) Uani 1 1 d . . . 
P4 P 0.71043(13) 0.28439(9) 0.59724(14) 0.0237(6) Uani 1 1 d . . . 
P5 P 0.97453(12) 0.15620(8) 0.59007(13) 0.0184(5) Uani 1 1 d . . . 
P6 P 0.62372(13) 0.20043(9) 0.46272(15) 0.0247(6) Uani 1 1 d . . . 
N1 N 0.8389(4) 0.1782(3) 0.3130(4) 0.0215(18) Uani 1 1 d . . . 
N2 N 0.7764(4) 0.2586(3) 0.3179(4) 0.0201(17) Uani 1 1 d . . . 
N3 N 0.9632(4) 0.2839(3) 0.5150(5) 0.0242(19) Uani 1 1 d . . . 
N4 N 0.8455(4) 0.3062(3) 0.5836(5) 0.0254(19) Uani 1 1 d . . . 
N5 N 0.8390(4) 0.1398(3) 0.6113(4) 0.0185(17) Uani 1 1 d . . . 
N6 N 0.7002(4) 0.1553(3) 0.5596(4) 0.0198(17) Uani 1 1 d . . . 
C1 C 0.8661(5) 0.1385(3) 0.3104(5) 0.022(2) Uani 1 1 d . . . 
C2 C 0.8720(6) 0.1160(4) 0.2475(6) 0.029(2) Uani 1 1 d . . . 
H2A H 0.8900 0.0872 0.2478 0.035 Uiso 1 1 calc R . . 
C3 C 0.8511(6) 0.1368(4) 0.1858(5) 0.032(3) Uani 1 1 d . . . 
H3A H 0.8546 0.1222 0.1428 0.038 Uiso 1 1 calc R . . 
C4 C 0.8247(5) 0.1792(4) 0.1857(5) 0.028(2) Uani 1 1 d . . . 
C5 C 0.8184(5) 0.1980(3) 0.2521(5) 0.020(2) Uani 1 1 d . . . 
C6 C 0.7901(5) 0.2420(4) 0.2552(5) 0.024(2) Uani 1 1 d . . . 
C7 C 0.7755(5) 0.2656(4) 0.1920(6) 0.027(2) Uani 1 1 d . . . 
C8 C 0.7511(6) 0.3089(4) 0.1960(6) 0.034(3) Uani 1 1 d . . . 
H8A H 0.7432 0.3264 0.1552 0.041 Uiso 1 1 calc R . . 
C9 C 0.7393(6) 0.3250(4) 0.2600(7) 0.037(3) Uani 1 1 d . . . 
H9A H 0.7238 0.3541 0.2642 0.044 Uiso 1 1 calc R . . 
C10 C 0.7498(5) 0.2985(3) 0.3193(5) 0.023(2) Uani 1 1 d . . . 
C11 C 0.8056(5) 0.2032(4) 0.1241(5) 0.029(2) Uani 1 1 d . . . 
H11A H 0.8083 0.1897 0.0801 0.035 Uiso 1 1 calc R . . 
C12 C 0.7836(5) 0.2449(4) 0.1264(5) 0.028(2) Uani 1 1 d . . . 
H12A H 0.7734 0.2607 0.0842 0.033 Uiso 1 1 calc R . . 
C13 C 1.0192(5) 0.2748(3) 0.4834(5) 0.024(2) Uani 1 1 d . . . 
C14 C 1.0808(5) 0.3005(4) 0.4881(6) 0.028(2) Uani 1 1 d . . . 
H14A H 1.1193 0.2929 0.4629 0.034 Uiso 1 1 calc R . . 
C15 C 1.0832(6) 0.3367(4) 0.5298(6) 0.033(3) Uani 1 1 d . . . 
H15A H 1.1237 0.3547 0.5341 0.039 Uiso 1 1 calc R . . 
C16 C 1.0253(6) 0.3470(4) 0.5664(6) 0.031(2) Uani 1 1 d . . . 
C17 C 0.9651(5) 0.3197(4) 0.5571(6) 0.028(2) Uani 1 1 d . . . 
C18 C 0.9045(5) 0.3302(3) 0.5938(5) 0.023(2) Uani 1 1 d . . . 
C19 C 0.9098(6) 0.3661(4) 0.6400(5) 0.029(2) Uani 1 1 d . . . 
C20 C 0.8525(6) 0.3757(4) 0.6779(6) 0.031(2) Uani 1 1 d . . . 
H20A H 0.8553 0.3989 0.7107 0.037 Uiso 1 1 calc R . . 
C21 C 0.7928(6) 0.3513(4) 0.6671(6) 0.034(3) Uani 1 1 d . . . 
H21A H 0.7535 0.3574 0.6919 0.041 Uiso 1 1 calc R . . 
C22 C 0.7908(5) 0.3169(3) 0.6183(6) 0.025(2) Uani 1 1 d . . . 
C23 C 1.0265(6) 0.3838(4) 0.6123(6) 0.033(3) Uani 1 1 d . . . 
H23A H 1.0667 0.4020 0.6174 0.040 Uiso 1 1 calc R . . 
C24 C 0.9722(6) 0.3928(4) 0.6478(6) 0.033(3) Uani 1 1 d . . . 
H24A H 0.9744 0.4170 0.6786 0.040 Uiso 1 1 calc R . . 
C25 C 0.9044(5) 0.1316(3) 0.6366(5) 0.0182(19) Uani 1 1 d . . . 
C26 C 0.9214(5) 0.1047(3) 0.6954(5) 0.022(2) Uani 1 1 d . . . 
H26A H 0.9688 0.1007 0.7135 0.026 Uiso 1 1 calc R . . 
C27 C 0.8687(5) 0.0845(3) 0.7258(5) 0.024(2) Uani 1 1 d . . . 
H27A H 0.8789 0.0665 0.7656 0.029 Uiso 1 1 calc R . . 
C28 C 0.7990(5) 0.0906(3) 0.6972(5) 0.021(2) Uani 1 1 d . . . 
C29 C 0.7868(5) 0.1193(3) 0.6407(5) 0.022(2) Uani 1 1 d . . . 
C30 C 0.7137(5) 0.1265(3) 0.6122(6) 0.024(2) Uani 1 1 d . . . 
C31 C 0.6601(5) 0.1036(3) 0.6413(6) 0.027(2) Uani 1 1 d . . . 
C32 C 0.5901(5) 0.1117(4) 0.6147(6) 0.031(3) Uani 1 1 d . . . 
H32A H 0.5527 0.0968 0.6332 0.037 Uiso 1 1 calc R . . 
C33 C 0.5767(5) 0.1412(4) 0.5620(6) 0.030(2) Uani 1 1 d U . . 
H33A H 0.5300 0.1474 0.5434 0.036 Uiso 1 1 calc R . . 
C34 C 0.6345(5) 0.1624(3) 0.5360(4) 0.0185(19) Uani 1 1 d U . . 
C35 C 0.7426(6) 0.0679(3) 0.7258(6) 0.027(2) Uani 1 1 d . . . 
H35A H 0.7526 0.0487 0.7642 0.032 Uiso 1 1 calc R . . 
C36 C 0.6755(5) 0.0737(3) 0.6985(6) 0.027(2) Uani 1 1 d . . . 
H36A H 0.6387 0.0581 0.7170 0.032 Uiso 1 1 calc R . . 
C37 C 0.9693(5) 0.0783(3) 0.3719(5) 0.023(2) Uani 1 1 d . . . 
C38 C 1.0376(5) 0.0937(4) 0.3685(5) 0.025(2) Uani 1 1 d . . . 
H38A H 1.0478 0.1236 0.3777 0.030 Uiso 1 1 calc R . . 
C39 C 1.0903(6) 0.0660(4) 0.3520(6) 0.031(2) Uani 1 1 d . . . 
H39A H 1.1365 0.0769 0.3499 0.038 Uiso 1 1 calc R . . 
C40 C 1.0759(6) 0.0229(4) 0.3385(6) 0.038(3) Uani 1 1 d . . . 
H40A H 1.1122 0.0038 0.3274 0.046 Uiso 1 1 calc R . . 
C41 C 1.0084(7) 0.0071(4) 0.3412(7) 0.039(3) Uani 1 1 d . . . 
H41A H 0.9984 -0.0227 0.3315 0.047 Uiso 1 1 calc R . . 
C42 C 0.9555(6) 0.0346(4) 0.3580(6) 0.034(3) Uani 1 1 d . . . 
H42A H 0.9094 0.0236 0.3599 0.041 Uiso 1 1 calc R . . 
C43 C 0.8332(5) 0.0808(3) 0.4223(6) 0.027(2) Uani 1 1 d . . . 
C44 C 0.8422(7) 0.0644(4) 0.4903(6) 0.035(3) Uani 1 1 d . . . 
H44A H 0.8825 0.0723 0.5202 0.042 Uiso 1 1 calc R . . 
C45 C 0.7929(7) 0.0366(4) 0.5145(7) 0.040(3) Uani 1 1 d . . . 
H45A H 0.7989 0.0264 0.5613 0.048 Uiso 1 1 calc R . . 
C46 C 0.7353(7) 0.0237(4) 0.4709(8) 0.045(3) Uani 1 1 d . . . 
H46A H 0.7020 0.0041 0.4871 0.054 Uiso 1 1 calc R . . 
C47 C 0.7266(6) 0.0397(4) 0.4029(8) 0.043(3) Uani 1 1 d . . . 
H47A H 0.6869 0.0312 0.3724 0.052 Uiso 1 1 calc R . . 
C48 C 0.7757(6) 0.0680(4) 0.3797(8) 0.040(3) Uani 1 1 d . . . 
H48A H 0.7692 0.0786 0.3331 0.048 Uiso 1 1 calc R . . 
C49 C 0.6385(6) 0.3441(4) 0.3780(6) 0.032(3) Uani 1 1 d . . . 
C50 C 0.5779(6) 0.3192(5) 0.3670(6) 0.040(3) Uani 1 1 d . . . 
H50A H 0.5810 0.2883 0.3668 0.048 Uiso 1 1 calc R . . 
C51 C 0.5129(7) 0.3392(6) 0.3563(7) 0.053(4) Uani 1 1 d . . . 
H51A H 0.4717 0.3220 0.3482 0.064 Uiso 1 1 calc R . . 
C52 C 0.5080(8) 0.3832(7) 0.3575(7) 0.065(5) Uani 1 1 d . . . 
H52A H 0.4632 0.3966 0.3528 0.078 Uiso 1 1 calc R . . 
C53 C 0.5658(9) 0.4077(6) 0.3652(7) 0.065(5) Uani 1 1 d . . . 
H53A H 0.5616 0.4385 0.3642 0.079 Uiso 1 1 calc R . . 
C54 C 0.6318(7) 0.3890(4) 0.3745(7) 0.044(3) Uani 1 1 d . . . 
H54A H 0.6724 0.4069 0.3784 0.053 Uiso 1 1 calc R . . 
C55 C 0.7827(5) 0.3588(3) 0.4317(6) 0.027(2) Uani 1 1 d . . . 
C56 C 0.7690(6) 0.3856(4) 0.4873(6) 0.030(2) Uani 1 1 d . . . 
H56A H 0.7274 0.3812 0.5095 0.036 Uiso 1 1 calc R . . 
C57 C 0.8143(6) 0.4183(4) 0.5106(6) 0.035(3) Uani 1 1 d . . . 
H57A H 0.8028 0.4374 0.5465 0.042 Uiso 1 1 calc R . . 
C58 C 0.8775(7) 0.4231(4) 0.4808(8) 0.046(3) Uani 1 1 d . . . 
H58A H 0.9096 0.4451 0.4975 0.055 Uiso 1 1 calc R . . 
C59 C 0.8937(6) 0.3960(4) 0.4271(7) 0.045(3) Uani 1 1 d . . . 
H59A H 0.9369 0.3993 0.4074 0.054 Uiso 1 1 calc R . . 
C60 C 0.8466(6) 0.3639(4) 0.4022(7) 0.037(3) Uani 1 1 d . . . 
H60A H 0.8575 0.3454 0.3652 0.045 Uiso 1 1 calc R . . 
C61 C 1.1037(5) 0.2087(3) 0.4241(6) 0.025(2) Uani 1 1 d . . . 
C62 C 1.1457(6) 0.2232(4) 0.3769(6) 0.033(3) Uani 1 1 d . . . 
H62A H 1.1269 0.2435 0.3428 0.040 Uiso 1 1 calc R . . 
C63 C 1.2154(6) 0.2100(4) 0.3756(7) 0.042(3) Uani 1 1 d . . . 
H63A H 1.2435 0.2209 0.3414 0.050 Uiso 1 1 calc R . . 
C64 C 1.2423(6) 0.1805(4) 0.4263(8) 0.046(3) Uani 1 1 d . . . 
H64A H 1.2896 0.1711 0.4270 0.056 Uiso 1 1 calc R . . 
C65 C 1.2013(5) 0.1647(4) 0.4750(6) 0.033(3) Uani 1 1 d . . . 
H65A H 1.2198 0.1442 0.5091 0.039 Uiso 1 1 calc R . . 
C66 C 1.1322(5) 0.1790(3) 0.4740(6) 0.029(2) Uani 1 1 d . . . 
H66A H 1.1039 0.1683 0.5080 0.035 Uiso 1 1 calc R . . 
C67 C 0.9898(5) 0.2488(3) 0.3410(5) 0.024(2) Uani 1 1 d . . . 
C68 C 0.9901(5) 0.2220(4) 0.2832(5) 0.024(2) Uani 1 1 d . . . 
H68A H 1.0013 0.1920 0.2892 0.029 Uiso 1 1 calc R . . 
C69 C 0.9741(5) 0.2386(4) 0.2164(6) 0.028(2) Uani 1 1 d . . . 
H69A H 0.9749 0.2198 0.1773 0.033 Uiso 1 1 calc R . . 
C70 C 0.9571(6) 0.2822(4) 0.2059(6) 0.032(3) Uani 1 1 d . . . 
H70A H 0.9468 0.2934 0.1601 0.039 Uiso 1 1 calc R . . 
C71 C 0.9554(6) 0.3088(4) 0.2636(7) 0.036(3) Uani 1 1 d . . . 
H71A H 0.9423 0.3385 0.2573 0.043 Uiso 1 1 calc R . . 
C72 C 0.9728(5) 0.2926(4) 0.3317(6) 0.027(2) Uani 1 1 d . . . 
H72A H 0.9729 0.3115 0.3709 0.032 Uiso 1 1 calc R . . 
C73 C 0.6395(5) 0.3208(3) 0.6143(6) 0.029(2) Uani 1 1 d . . . 
C74 C 0.5965(6) 0.3382(4) 0.5594(6) 0.031(2) Uani 1 1 d . . . 
H74A H 0.6042 0.3304 0.5130 0.037 Uiso 1 1 calc R . . 
C75 C 0.5425(6) 0.3667(4) 0.5702(8) 0.047(3) Uani 1 1 d . . . 
H75A H 0.5148 0.3784 0.5311 0.056 Uiso 1 1 calc R . . 
C76 C 0.5286(6) 0.3780(4) 0.6355(7) 0.041(3) Uani 1 1 d . . . 
H76A H 0.4909 0.3972 0.6423 0.049 Uiso 1 1 calc R . . 
C77 C 0.5700(6) 0.3612(4) 0.6922(7) 0.038(3) Uani 1 1 d . . . 
H77A H 0.5614 0.3696 0.7381 0.046 Uiso 1 1 calc R . . 
C78 C 0.6240(6) 0.3324(4) 0.6828(6) 0.033(3) Uani 1 1 d . . . 
H78A H 0.6508 0.3203 0.7223 0.040 Uiso 1 1 calc R . . 
C79 C 0.7135(5) 0.2461(3) 0.6697(6) 0.028(2) Uani 1 1 d . . . 
C80 C 0.7762(6) 0.2355(4) 0.7090(6) 0.030(2) Uani 1 1 d . . . 
H80A H 0.8181 0.2502 0.7003 0.036 Uiso 1 1 calc R . . 
C81 C 0.7783(6) 0.2042(4) 0.7603(6) 0.033(3) Uani 1 1 d . . . 
H81A H 0.8219 0.1968 0.7851 0.039 Uiso 1 1 calc R . . 
C82 C 0.7177(6) 0.1834(4) 0.7764(6) 0.032(3) Uani 1 1 d . . . 
H82A H 0.7192 0.1625 0.8129 0.038 Uiso 1 1 calc R . . 
C83 C 0.6547(6) 0.1937(4) 0.7378(6) 0.030(2) Uani 1 1 d . . . 
H83A H 0.6128 0.1796 0.7481 0.036 Uiso 1 1 calc R . . 
C84 C 0.6521(6) 0.2244(4) 0.6846(6) 0.029(2) Uani 1 1 d . . . 
H84A H 0.6088 0.2308 0.6582 0.035 Uiso 1 1 calc R . . 
C85 C 1.0468(5) 0.1171(3) 0.6063(6) 0.023(2) Uani 1 1 d . . . 
C86 C 1.0908(5) 0.1161(3) 0.6683(6) 0.026(2) Uani 1 1 d . . . 
H86A H 1.0840 0.1360 0.7049 0.032 Uiso 1 1 calc R . . 
C87 C 1.1448(6) 0.0858(4) 0.6761(7) 0.039(3) Uani 1 1 d . . . 
H87A H 1.1737 0.0843 0.7190 0.047 Uiso 1 1 calc R . . 
C88 C 1.1574(6) 0.0576(4) 0.6220(7) 0.037(3) Uani 1 1 d . . . 
H88A H 1.1958 0.0379 0.6271 0.044 Uiso 1 1 calc R . . 
C89 C 1.1131(6) 0.0587(4) 0.5606(6) 0.030(2) Uani 1 1 d . . . 
H89A H 1.1205 0.0394 0.5235 0.036 Uiso 1 1 calc R . . 
C90 C 1.0580(6) 0.0879(3) 0.5539(6) 0.029(2) Uani 1 1 d . . . 
H90A H 1.0271 0.0880 0.5122 0.034 Uiso 1 1 calc R . . 
C91 C 1.0016(5) 0.2025(3) 0.6460(5) 0.021(2) Uani 1 1 d . . . 
C92 C 0.9546(5) 0.2223(4) 0.6877(6) 0.032(3) Uani 1 1 d . . . 
H92A H 0.9106 0.2089 0.6924 0.038 Uiso 1 1 calc R . . 
C93 C 0.9713(6) 0.2606(4) 0.7217(6) 0.035(3) Uani 1 1 d . . . 
H93A H 0.9379 0.2742 0.7479 0.042 Uiso 1 1 calc R . . 
C94 C 1.0365(6) 0.2799(4) 0.7184(6) 0.030(2) Uani 1 1 d . . . 
H94A H 1.0478 0.3064 0.7424 0.037 Uiso 1 1 calc R . . 
C95 C 1.0838(5) 0.2604(4) 0.6804(6) 0.030(2) Uani 1 1 d . . . 
H95A H 1.1290 0.2729 0.6793 0.036 Uiso 1 1 calc R . . 
C96 C 1.0669(5) 0.2221(3) 0.6427(6) 0.027(2) Uani 1 1 d . . . 
H96A H 1.0999 0.2096 0.6149 0.033 Uiso 1 1 calc R . . 
C97 C 0.5322(5) 0.2179(3) 0.4584(6) 0.024(2) Uani 1 1 d . . . 
C98 C 0.4841(6) 0.2099(4) 0.4025(6) 0.034(3) Uani 1 1 d . . . 
H98A H 0.4968 0.1924 0.3651 0.041 Uiso 1 1 calc R . . 
C99 C 0.4161(6) 0.2273(5) 0.4000(7) 0.044(3) Uani 1 1 d . . . 
H99A H 0.3833 0.2215 0.3609 0.053 Uiso 1 1 calc R . . 
C100 C 0.3969(5) 0.2526(4) 0.4532(6) 0.032(3) Uani 1 1 d . . . 
H10A H 0.3511 0.2646 0.4510 0.039 Uiso 1 1 calc R . . 
C101 C 0.4452(6) 0.2607(4) 0.5111(6) 0.037(3) Uani 1 1 d . . . 
H10B H 0.4321 0.2779 0.5487 0.045 Uiso 1 1 calc R . . 
C102 C 0.5122(6) 0.2435(4) 0.5133(7) 0.039(3) Uani 1 1 d . . . 
H10C H 0.5449 0.2491 0.5525 0.047 Uiso 1 1 calc R . . 
C103 C 0.6259(5) 0.1631(3) 0.3884(6) 0.028(2) Uani 1 1 d . . . 
C104 C 0.6696(5) 0.1711(4) 0.3364(6) 0.029(2) Uani 1 1 d . . . 
H10D H 0.6995 0.1958 0.3390 0.034 Uiso 1 1 calc R . . 
C105 C 0.6691(6) 0.1424(4) 0.2807(6) 0.032(3) Uani 1 1 d . . . 
H10E H 0.6990 0.1475 0.2449 0.039 Uiso 1 1 calc R . . 
C106 C 0.6256(6) 0.1069(4) 0.2770(7) 0.040(3) Uani 1 1 d . . . 
H10F H 0.6250 0.0878 0.2382 0.049 Uiso 1 1 calc R . . 
C107 C 0.5834(7) 0.0988(4) 0.3279(8) 0.047(3) Uani 1 1 d . . . 
H10G H 0.5540 0.0739 0.3249 0.056 Uiso 1 1 calc R . . 
C108 C 0.5831(6) 0.1260(4) 0.3831(7) 0.042(3) Uani 1 1 d . . . 
H10H H 0.5535 0.1200 0.4187 0.050 Uiso 1 1 calc R . . 
P7 P 0.86924(19) 0.40406(13) 0.1050(2) 0.0559(10) Uani 1 1 d D . . 
F1 F 0.8604(6) 0.3533(3) 0.0883(7) 0.105(4) Uani 1 1 d D . . 
F2 F 0.8168(5) 0.4023(4) 0.1640(6) 0.091(4) Uani 1 1 d D . . 
F3 F 0.8059(5) 0.4139(3) 0.0469(5) 0.077(3) Uani 1 1 d D . . 
F4 F 0.8785(5) 0.4543(3) 0.1169(5) 0.075(3) Uani 1 1 d D . . 
F5 F 0.9219(5) 0.4053(4) 0.0464(5) 0.087(3) Uani 1 1 d D . . 
F6 F 0.9324(4) 0.3946(3) 0.1632(5) 0.076(3) Uani 1 1 d D . . 
P8A P 0.3209(5) 0.3873(3) 0.4511(4) 0.034(2) Uani 0.487(12) 1 d PD A 1 
F7A F 0.3508(9) 0.3565(6) 0.3948(9) 0.075(6) Uani 0.487(12) 1 d PDU A 1 
F8A F 0.2555(10) 0.3566(7) 0.4565(11) 0.089(7) Uani 0.487(12) 1 d PDU A 1 
F9A F 0.2786(10) 0.4135(7) 0.3898(10) 0.080(7) Uani 0.487(12) 1 d PDU A 1 
F10A F 0.2918(11) 0.4190(8) 0.5056(11) 0.107(10) Uani 0.487(12) 1 d PDU A 1 
F11A F 0.3869(7) 0.4177(5) 0.4465(10) 0.057(5) Uani 0.487(12) 1 d PDU A 1 
F12A F 0.3635(8) 0.3614(6) 0.5122(8) 0.066(6) Uani 0.487(12) 1 d PDU A 1 
P8B P 0.2905(6) 0.3923(3) 0.4573(4) 0.045(3) Uani 0.513(12) 1 d PD A 2 
F7B F 0.3191(11) 0.4004(6) 0.3839(8) 0.076(6) Uani 0.513(12) 1 d PDU A 2 
F8B F 0.3207(12) 0.3445(5) 0.4602(11) 0.091(7) Uani 0.513(12) 1 d PDU A 2 
F9B F 0.2174(8) 0.3766(6) 0.4195(9) 0.067(5) Uani 0.513(12) 1 d PDU A 2 
F10B F 0.2577(10) 0.3846(5) 0.5281(7) 0.068(5) Uani 0.513(12) 1 d PDU A 2 
F11B F 0.2627(8) 0.4411(4) 0.4554(10) 0.063(5) Uani 0.513(12) 1 d PDU A 2 
F12B F 0.3609(8) 0.4085(7) 0.4990(11) 0.093(7) Uani 0.513(12) 1 d PDU A 2 
C1S C -0.1411(10) 0.4375(6) -0.1083(12) 0.140(12) Uani 1 1 d D . . 
H1S H -0.1572 0.4334 -0.0609 0.168 Uiso 1 1 calc R . . 
Cl1 Cl -0.0779(9) 0.4822(4) -0.1032(8) 0.337(12) Uani 1 1 d D . . 
Cl2 Cl -0.2123(3) 0.4524(2) -0.1640(4) 0.123(3) Uani 1 1 d D . . 
Cl3 Cl -0.1034(2) 0.38946(16) -0.1321(3) 0.0776(13) Uani 1 1 d D . . 
C2SA C 0.1018(17) 0.4488(7) 0.3808(13) 0.052(13) Uani 0.43(3) 1 d PD B 1 
H2SA H 0.1475 0.4337 0.3933 0.062 Uiso 0.43(3) 1 calc PR B 1 
Cl4A Cl 0.0473(19) 0.4153(12) 0.3219(16) 0.208(19) Uani 0.43(3) 1 d PD B 1 
Cl5A Cl 0.1164(9) 0.4971(4) 0.3392(8) 0.053(3) Uani 0.43(3) 1 d PD B 1 
Cl6A Cl 0.0609(13) 0.4583(8) 0.4563(10) 0.067(6) Uani 0.43(3) 1 d PD B 1 
C2SB C 0.1232(15) 0.4414(7) 0.4103(14) 0.078(14) Uani 0.57(3) 1 d PD B 2 
H2SB H 0.1686 0.4283 0.4302 0.094 Uiso 0.57(3) 1 calc PR B 2 
Cl4B Cl 0.0786(6) 0.4016(3) 0.3550(7) 0.067(4) Uani 0.57(3) 1 d PD B 2 
Cl5B Cl 0.1427(8) 0.4867(4) 0.3636(9) 0.066(4) Uani 0.57(3) 1 d PD B 2 
Cl6B Cl 0.0746(9) 0.4534(5) 0.4797(8) 0.056(3) Uani 0.57(3) 1 d PD B 2 
C3S C 0.6325(7) 0.4885(4) 0.6027(7) 0.062(4) Uani 1 1 d D . . 
H3S H 0.6545 0.5177 0.5985 0.075 Uiso 1 1 calc R . . 
Cl7 Cl 0.6197(3) 0.46501(16) 0.5184(3) 0.0930(17) Uani 1 1 d D . . 
Cl8 Cl 0.5548(2) 0.49521(13) 0.6400(3) 0.0674(11) Uani 1 1 d D . . 
Cl9 Cl 0.6899(2) 0.45606(16) 0.6557(3) 0.0849(15) Uani 1 1 d D . . 
O1W O 0.0728(4) 0.4983(3) -0.3413(4) 0.040(2) Uiso 1 1 d . . . 
H1WA H 0.1009 0.4965 -0.3045 0.047 Uiso 1 1 d R . . 
H1WB H 0.0316 0.4895 -0.3546 0.047 Uiso 1 1 d R . . 
O2W O 0.2144(11) 0.5210(7) 0.7179(11) 0.152(7) Uiso 1 1 d . . . 
H2WA H 0.2326 0.5267 0.6804 0.183 Uiso 1 1 d R . . 
H2WB H 0.2440 0.5011 0.7294 0.183 Uiso 1 1 d R . . 
O3W O -0.0097(5) 0.5023(3) -0.2225(5) 0.072(3) Uiso 1 1 d . . . 
H3WA H -0.0297 0.4960 -0.1862 0.086 Uiso 1 1 d R . . 
H3WB H -0.0411 0.5024 -0.2569 0.086 Uiso 1 1 d R . . 
O4W O 0.3491(5) 0.4909(3) 0.6696(5) 0.138(7) Uiso 1 1 d R . . 
H4WA H 0.3749 0.4778 0.6429 0.166 Uiso 1 1 d R . . 
H4WB H 0.3159 0.5037 0.6877 0.166 Uiso 1 1 d R . . 
O5W O 0.2138(9) 0.4548(6) 0.6285(9) 0.121(6) Uiso 1 1 d . . . 
H5WA H 0.1972 0.4426 0.5907 0.145 Uiso 1 1 d R . . 
H5WB H 0.2510 0.4405 0.6403 0.145 Uiso 1 1 d R . . 
O6W O -0.0454(9) 0.5347(6) 0.0132(9) 0.123(6) Uiso 1 1 d . . . 
H6WA H -0.0299 0.5165 0.0443 0.148 Uiso 1 1 d R . . 
H6WB H -0.0771 0.5263 -0.0179 0.148 Uiso 1 1 d R . . 
 
loop_ 
 _atom_site_aniso_label 
 _atom_site_aniso_U_11 
 _atom_site_aniso_U_22 
 _atom_site_aniso_U_33 
 _atom_site_aniso_U_23 
 _atom_site_aniso_U_13 
 _atom_site_aniso_U_12 
Pt1 0.01642(18) 0.02096(19) 0.01868(19) 0.00015(15) 0.00274(14) -0.00063(14) 
Au1 0.01657(19) 0.0250(2) 0.0259(2) 0.00106(16) 0.00408(15) -0.00006(15) 
Tl1 0.0375(3) 0.0459(3) 0.0397(3) -0.0044(2) 0.0013(2) -0.0013(2) 
P1 0.0192(12) 0.0214(13) 0.0196(13) -0.0003(10) 0.0035(10) -0.0002(10) 
P2 0.0190(13) 0.0261(14) 0.0276(14) 0.0048(11) 0.0013(11) 0.0041(10) 
P3 0.0149(12) 0.0237(13) 0.0228(13) 0.0005(10) 0.0023(10) 0.0012(10) 
P4 0.0190(12) 0.0264(14) 0.0268(14) -0.0015(11) 0.0070(10) 0.0001(10) 
P5 0.0151(11) 0.0206(12) 0.0198(12) 0.0008(10) 0.0028(9) 0.0015(9) 
P6 0.0146(12) 0.0275(14) 0.0318(15) 0.0040(11) 0.0014(11) 0.0012(10) 
N1 0.016(4) 0.025(5) 0.023(4) 0.001(4) 0.001(3) -0.001(3) 
N2 0.012(4) 0.029(5) 0.020(4) 0.000(3) 0.000(3) -0.001(3) 
N3 0.017(4) 0.023(4) 0.032(5) 0.000(4) 0.003(4) 0.000(3) 
N4 0.024(4) 0.025(5) 0.027(5) -0.001(4) 0.004(4) 0.000(4) 
N5 0.017(4) 0.019(4) 0.020(4) -0.004(3) 0.004(3) 0.001(3) 
N6 0.021(4) 0.019(4) 0.020(4) -0.003(3) 0.003(3) 0.000(3) 
C1 0.016(5) 0.029(5) 0.022(5) -0.003(4) 0.004(4) -0.001(4) 
C2 0.027(6) 0.034(6) 0.026(6) 0.002(5) 0.003(4) 0.007(5) 
C3 0.035(6) 0.046(7) 0.016(5) -0.003(5) 0.011(4) -0.001(5) 
C4 0.018(5) 0.042(6) 0.023(5) 0.000(5) 0.000(4) -0.004(4) 
C5 0.013(4) 0.029(5) 0.017(5) 0.002(4) 0.000(4) -0.003(4) 
C6 0.014(5) 0.034(6) 0.026(5) 0.005(4) 0.007(4) 0.004(4) 
C7 0.012(5) 0.042(6) 0.026(6) 0.008(5) 0.001(4) -0.002(4) 
C8 0.033(6) 0.037(6) 0.033(6) 0.013(5) 0.003(5) 0.004(5) 
C9 0.029(6) 0.033(6) 0.049(8) 0.010(5) 0.005(5) 0.005(5) 
C10 0.017(5) 0.028(5) 0.027(5) 0.007(4) 0.007(4) 0.004(4) 
C11 0.022(5) 0.047(7) 0.019(5) -0.003(5) -0.001(4) -0.005(5) 
C12 0.028(5) 0.049(7) 0.005(4) 0.010(4) -0.001(4) -0.001(5) 
C13 0.017(5) 0.027(5) 0.028(6) 0.000(4) 0.000(4) -0.001(4) 
C14 0.016(5) 0.032(6) 0.036(6) 0.000(5) 0.001(4) -0.001(4) 
C15 0.023(5) 0.024(6) 0.050(7) -0.008(5) 0.003(5) -0.009(4) 
C16 0.024(5) 0.030(6) 0.036(6) -0.005(5) -0.005(5) -0.001(4) 
C17 0.022(5) 0.031(6) 0.029(6) 0.007(5) -0.004(4) 0.000(4) 
C18 0.022(5) 0.023(5) 0.025(5) -0.002(4) 0.003(4) 0.006(4) 
C19 0.029(6) 0.035(6) 0.020(5) -0.003(5) -0.003(4) 0.005(5) 
C20 0.039(6) 0.035(6) 0.020(5) -0.011(5) 0.005(5) 0.000(5) 
C21 0.031(6) 0.033(6) 0.040(7) -0.008(5) 0.009(5) 0.004(5) 
C22 0.022(5) 0.025(5) 0.029(6) 0.000(4) 0.004(4) 0.001(4) 
C23 0.028(6) 0.029(6) 0.041(7) -0.012(5) 0.001(5) -0.007(5) 
C24 0.033(6) 0.031(6) 0.033(6) -0.016(5) -0.005(5) -0.001(5) 
C25 0.020(5) 0.019(5) 0.014(5) -0.004(4) -0.001(4) -0.001(4) 
C26 0.020(5) 0.030(5) 0.016(5) 0.000(4) 0.001(4) 0.004(4) 
C27 0.028(5) 0.030(6) 0.015(5) 0.005(4) 0.002(4) 0.002(4) 
C28 0.018(5) 0.024(5) 0.023(5) -0.004(4) 0.006(4) -0.002(4) 
C29 0.026(5) 0.016(5) 0.026(5) -0.007(4) 0.009(4) 0.002(4) 
C30 0.022(5) 0.023(5) 0.028(6) -0.005(4) 0.005(4) -0.001(4) 
C31 0.022(5) 0.025(5) 0.035(6) 0.002(5) 0.002(4) -0.001(4) 
C32 0.016(5) 0.031(6) 0.047(7) 0.009(5) 0.004(5) 0.000(4) 
C33 0.016(5) 0.040(6) 0.034(6) 0.005(5) -0.004(4) 0.001(4) 
C34 0.025(4) 0.027(5) 0.003(4) -0.004(3) -0.006(3) 0.001(4) 
C35 0.034(6) 0.022(5) 0.024(5) 0.006(4) 0.010(5) -0.002(4) 
C36 0.025(5) 0.027(6) 0.029(6) 0.004(5) 0.010(4) -0.001(4) 
C37 0.030(5) 0.023(5) 0.016(5) -0.002(4) 0.008(4) 0.002(4) 
C38 0.021(5) 0.036(6) 0.018(5) -0.001(4) 0.004(4) -0.003(4) 
C39 0.022(5) 0.041(7) 0.031(6) -0.004(5) 0.003(4) 0.004(5) 
C40 0.038(7) 0.040(7) 0.037(7) 0.003(5) 0.009(5) 0.018(5) 
C41 0.044(7) 0.029(6) 0.045(7) -0.005(5) 0.009(6) 0.003(5) 
C42 0.029(6) 0.031(6) 0.041(7) -0.002(5) 0.005(5) 0.003(5) 
C43 0.022(5) 0.024(5) 0.038(6) -0.005(5) 0.011(5) 0.001(4) 
C44 0.043(7) 0.031(6) 0.034(6) -0.007(5) 0.013(5) -0.014(5) 
C45 0.055(8) 0.034(6) 0.034(7) -0.012(5) 0.023(6) -0.014(6) 
C46 0.036(7) 0.031(7) 0.071(10) 0.002(6) 0.021(7) -0.008(5) 
C47 0.027(6) 0.036(7) 0.066(9) 0.009(6) 0.004(6) -0.002(5) 
C48 0.024(6) 0.031(6) 0.065(9) 0.011(6) 0.002(6) -0.004(5) 
C49 0.032(6) 0.035(6) 0.028(6) 0.001(5) 0.001(5) 0.011(5) 
C50 0.032(6) 0.052(8) 0.034(7) 0.019(6) -0.010(5) 0.004(6) 
C51 0.026(6) 0.106(14) 0.027(7) 0.015(7) -0.005(5) 0.009(7) 
C52 0.039(8) 0.121(16) 0.033(8) -0.006(9) -0.008(6) 0.046(10) 
C53 0.082(12) 0.067(10) 0.042(8) -0.027(7) -0.023(8) 0.046(9) 
C54 0.051(8) 0.043(7) 0.038(7) -0.007(6) -0.004(6) 0.024(6) 
C55 0.024(5) 0.022(5) 0.035(6) 0.003(4) 0.005(4) 0.006(4) 
C56 0.025(5) 0.032(6) 0.035(6) 0.004(5) 0.010(5) 0.005(5) 
C57 0.037(6) 0.039(7) 0.029(6) 0.000(5) 0.004(5) 0.000(5) 
C58 0.045(8) 0.032(7) 0.062(9) 0.004(6) 0.013(7) -0.007(6) 
C59 0.030(6) 0.046(8) 0.061(9) -0.008(7) 0.016(6) -0.010(6) 
C60 0.029(6) 0.030(6) 0.053(8) 0.005(5) 0.007(5) 0.000(5) 
C61 0.011(5) 0.024(5) 0.038(6) 0.000(5) -0.004(4) -0.003(4) 
C62 0.026(6) 0.037(6) 0.033(6) -0.001(5) -0.014(5) 0.004(5) 
C63 0.016(5) 0.057(8) 0.053(8) 0.019(6) 0.014(5) 0.003(5) 
C64 0.016(5) 0.051(8) 0.072(10) 0.014(7) 0.003(6) 0.007(5) 
C65 0.017(5) 0.038(6) 0.044(7) 0.013(5) 0.004(5) 0.004(5) 
C66 0.021(5) 0.023(5) 0.043(7) 0.003(5) 0.001(5) -0.002(4) 
C67 0.016(5) 0.030(6) 0.025(5) 0.002(4) 0.005(4) -0.004(4) 
C68 0.019(5) 0.032(6) 0.020(5) 0.002(4) -0.001(4) 0.001(4) 
C69 0.019(5) 0.036(6) 0.028(6) -0.003(5) 0.005(4) -0.008(4) 
C70 0.022(5) 0.043(7) 0.031(6) 0.010(5) 0.004(5) 0.001(5) 
C71 0.021(5) 0.034(6) 0.052(8) 0.010(6) 0.008(5) 0.009(5) 
C72 0.021(5) 0.031(6) 0.029(6) 0.007(5) 0.004(4) 0.006(4) 
C73 0.023(5) 0.026(6) 0.039(6) 0.006(5) 0.010(5) -0.007(4) 
C74 0.027(6) 0.038(6) 0.030(6) 0.000(5) 0.010(5) 0.008(5) 
C75 0.026(6) 0.038(7) 0.076(10) 0.007(7) 0.001(6) 0.002(5) 
C76 0.033(6) 0.033(6) 0.062(9) 0.003(6) 0.031(6) 0.004(5) 
C77 0.038(7) 0.035(6) 0.045(7) -0.005(6) 0.022(6) 0.002(5) 
C78 0.040(7) 0.025(6) 0.037(7) -0.002(5) 0.017(5) -0.002(5) 
C79 0.024(5) 0.025(5) 0.035(6) 0.000(5) 0.005(5) 0.001(4) 
C80 0.025(5) 0.029(6) 0.038(6) -0.003(5) 0.007(5) 0.002(4) 
C81 0.026(6) 0.040(7) 0.031(6) -0.003(5) -0.003(5) 0.008(5) 
C82 0.044(7) 0.033(6) 0.020(5) 0.000(5) 0.014(5) 0.008(5) 
C83 0.032(6) 0.035(6) 0.026(6) -0.005(5) 0.013(5) 0.000(5) 
C84 0.025(5) 0.033(6) 0.032(6) -0.003(5) 0.009(5) -0.002(5) 
C85 0.016(5) 0.019(5) 0.034(6) 0.001(4) 0.010(4) 0.003(4) 
C86 0.022(5) 0.021(5) 0.035(6) -0.002(4) -0.006(4) -0.001(4) 
C87 0.020(5) 0.025(6) 0.068(9) -0.004(6) -0.014(5) -0.001(5) 
C88 0.019(5) 0.024(6) 0.067(9) 0.007(6) 0.002(5) 0.005(4) 
C89 0.037(6) 0.026(6) 0.030(6) 0.002(5) 0.013(5) 0.007(5) 
C90 0.028(6) 0.026(6) 0.032(6) 0.005(5) 0.007(5) 0.002(4) 
C91 0.021(5) 0.024(5) 0.017(5) 0.000(4) 0.003(4) 0.003(4) 
C92 0.016(5) 0.046(7) 0.032(6) -0.015(5) 0.006(4) -0.005(5) 
C93 0.024(6) 0.055(8) 0.026(6) -0.024(5) 0.003(4) 0.001(5) 
C94 0.032(6) 0.029(6) 0.029(6) -0.009(5) -0.003(5) 0.002(5) 
C95 0.018(5) 0.036(6) 0.035(6) -0.007(5) 0.001(4) -0.007(4) 
C96 0.022(5) 0.028(6) 0.033(6) -0.003(5) 0.008(4) -0.001(4) 
C97 0.019(5) 0.022(5) 0.031(6) 0.010(4) 0.004(4) 0.001(4) 
C98 0.026(6) 0.048(7) 0.028(6) -0.004(5) 0.005(5) 0.005(5) 
C99 0.026(6) 0.065(9) 0.041(7) 0.007(6) -0.001(5) 0.012(6) 
C100 0.010(5) 0.045(7) 0.042(7) 0.005(5) 0.007(4) 0.006(5) 
C101 0.021(6) 0.058(8) 0.035(7) -0.002(6) 0.013(5) 0.009(5) 
C102 0.021(6) 0.053(8) 0.042(7) -0.014(6) -0.004(5) 0.007(5) 
C103 0.016(5) 0.025(5) 0.041(6) -0.006(5) -0.004(4) 0.005(4) 
C104 0.017(5) 0.028(6) 0.041(6) 0.001(5) 0.003(4) 0.003(4) 
C105 0.023(5) 0.042(7) 0.033(6) -0.003(5) 0.002(5) 0.006(5) 
C106 0.030(6) 0.037(7) 0.051(8) -0.011(6) -0.012(6) 0.009(5) 
C107 0.032(7) 0.034(7) 0.073(10) -0.006(7) -0.003(6) -0.009(5) 
C108 0.030(6) 0.035(7) 0.061(9) -0.002(6) 0.012(6) -0.005(5) 
P7 0.0343(18) 0.056(2) 0.077(3) 0.015(2) 0.0051(18) 0.0135(17) 
F1 0.088(8) 0.035(5) 0.182(13) 0.005(6) -0.030(8) 0.016(5) 
F2 0.055(6) 0.097(8) 0.127(10) 0.023(7) 0.035(6) 0.020(5) 
F3 0.056(6) 0.067(6) 0.103(8) -0.002(5) -0.019(5) 0.010(5) 
F4 0.065(6) 0.063(6) 0.093(7) 0.005(5) -0.012(5) 0.003(5) 
F5 0.066(6) 0.128(9) 0.070(6) 0.032(6) 0.025(5) 0.032(6) 
F6 0.037(4) 0.107(8) 0.084(7) 0.046(6) 0.007(4) 0.013(5) 
P8A 0.029(5) 0.043(5) 0.030(4) 0.004(3) 0.003(4) 0.006(4) 
F7A 0.079(13) 0.071(13) 0.072(13) -0.038(11) -0.007(11) 0.006(10) 
F8A 0.056(13) 0.12(2) 0.087(16) 0.008(14) 0.006(12) -0.038(14) 
F9A 0.066(14) 0.102(17) 0.069(14) 0.024(12) -0.013(11) 0.038(12) 
F10A 0.071(14) 0.16(2) 0.093(17) -0.078(18) 0.008(13) 0.024(15) 
F11A 0.051(10) 0.035(9) 0.088(14) 0.003(9) 0.015(10) -0.008(7) 
F12A 0.049(10) 0.087(14) 0.059(12) 0.026(10) -0.009(8) -0.006(10) 
P8B 0.060(7) 0.043(5) 0.032(4) 0.012(3) 0.005(5) 0.008(5) 
F7B 0.097(16) 0.088(15) 0.049(11) 0.023(10) 0.039(11) 0.019(12) 
F8B 0.122(19) 0.058(12) 0.101(17) 0.019(11) 0.046(15) 0.033(12) 
F9B 0.077(13) 0.071(12) 0.054(11) -0.024(9) 0.010(9) -0.010(10) 
F10B 0.099(15) 0.054(11) 0.054(11) 0.009(8) 0.022(10) 0.016(10) 
F11B 0.066(11) 0.037(9) 0.085(13) 0.011(9) 0.001(10) -0.006(8) 
F12B 0.058(12) 0.119(18) 0.097(17) -0.019(15) -0.012(12) 0.011(12) 
C1S 0.20(3) 0.075(16) 0.15(2) 0.007(16) 0.04(2) 0.083(19) 
Cl1 0.55(3) 0.137(9) 0.289(18) -0.051(10) -0.159(19) 0.137(14) 
Cl2 0.079(4) 0.140(5) 0.157(6) 0.069(5) 0.045(4) 0.052(4) 
Cl3 0.066(3) 0.088(3) 0.080(3) 0.000(2) 0.012(2) 0.033(2) 
C2SA 0.06(3) 0.07(3) 0.04(2) -0.007(17) 0.031(18) -0.02(2) 
Cl4A 0.19(3) 0.32(3) 0.13(2) -0.17(2) 0.125(19) -0.21(3) 
Cl5A 0.082(9) 0.032(5) 0.046(6) 0.005(4) 0.015(6) 0.009(5) 
Cl6A 0.069(10) 0.082(11) 0.051(10) -0.016(8) 0.016(8) -0.038(8) 
C2SB 0.06(2) 0.043(17) 0.14(4) -0.05(2) 0.04(2) -0.028(15) 
Cl4B 0.072(6) 0.044(5) 0.094(8) -0.041(4) 0.054(5) -0.032(4) 
Cl5B 0.072(8) 0.057(6) 0.076(8) -0.022(5) 0.040(6) -0.020(5) 
Cl6B 0.063(7) 0.057(5) 0.052(7) -0.012(6) 0.022(6) -0.005(4) 
C3S 0.062(10) 0.034(7) 0.095(13) -0.016(8) 0.026(9) -0.003(7) 
Cl7 0.146(5) 0.070(3) 0.065(3) -0.024(2) 0.022(3) -0.007(3) 
Cl8 0.053(2) 0.049(2) 0.103(3) -0.023(2) 0.020(2) 0.0064(17) 
Cl9 0.044(2) 0.076(3) 0.135(5) 0.031(3) 0.009(2) 0.000(2) 
 
_geom_special_details 
; 
 All esds (except the esd in the dihedral angle between two l.s. planes) 
 are estimated using the full covariance matrix.  The cell esds are taken 
 into account individually in the estimation of esds in distances, angles 
 and torsion angles; correlations between esds in cell parameters are only 
 used when they are defined by crystal symmetry.  An approximate (isotropic) 
 treatment of cell esds is used for estimating esds involving l.s. planes. 
; 
 
loop_ 
 _geom_bond_atom_site_label_1 
 _geom_bond_atom_site_label_2 
 _geom_bond_distance 
 _geom_bond_site_symmetry_2 
 _geom_bond_publ_flag 
Pt1 P1 2.302(3) . ? 
Pt1 P5 2.305(3) . ? 
Pt1 P3 2.310(3) . ? 
Pt1 Tl1 2.7712(6) . ? 
Au1 P6 2.322(3) . ? 
Au1 P2 2.327(3) . ? 
Au1 P4 2.367(3) . ? 
Au1 Tl1 2.9000(6) . ? 
P1 C43 1.826(11) . ? 
P1 C1 1.844(10) . ? 
P1 C37 1.845(10) . ? 
P2 C55 1.820(11) . ? 
P2 C10 1.824(11) . ? 
P2 C49 1.832(11) . ? 
P3 C61 1.834(10) . ? 
P3 C67 1.834(11) . ? 
P3 C13 1.851(11) . ? 
P4 C73 1.816(11) . ? 
P4 C79 1.821(11) . ? 
P4 C22 1.847(11) . ? 
P5 C91 1.828(10) . ? 
P5 C85 1.837(10) . ? 
P5 C25 1.847(10) . ? 
P6 C34 1.827(10) . ? 
P6 C97 1.829(10) . ? 
P6 C103 1.838(11) . ? 
N1 C1 1.326(13) . ? 
N1 C5 1.345(13) . ? 
N2 C10 1.327(13) . ? 
N2 C6 1.360(13) . ? 
N3 C13 1.314(13) . ? 
N3 C17 1.364(14) . ? 
N4 C22 1.339(13) . ? 
N4 C18 1.348(13) . ? 
N5 C25 1.325(12) . ? 
N5 C29 1.352(13) . ? 
N6 C34 1.315(12) . ? 
N6 C30 1.350(13) . ? 
C1 C2 1.409(15) . ? 
C2 C3 1.374(15) . ? 
C3 C4 1.395(16) . ? 
C4 C11 1.414(15) . ? 
C4 C5 1.419(14) . ? 
C5 C6 1.460(14) . ? 
C6 C7 1.421(14) . ? 
C7 C8 1.415(16) . ? 
C7 C12 1.436(15) . ? 
C8 C9 1.366(17) . ? 
C9 C10 1.402(15) . ? 
C11 C12 1.350(16) . ? 
C13 C14 1.416(14) . ? 
C14 C15 1.369(15) . ? 
C15 C16 1.408(16) . ? 
C16 C17 1.424(15) . ? 
C16 C23 1.432(15) . ? 
C17 C18 1.453(15) . ? 
C18 C19 1.414(15) . ? 
C19 C20 1.409(15) . ? 
C19 C24 1.445(16) . ? 
C20 C21 1.366(16) . ? 
C21 C22 1.411(15) . ? 
C23 C24 1.329(16) . ? 
C25 C26 1.413(14) . ? 
C26 C27 1.365(14) . ? 
C27 C28 1.406(14) . ? 
C28 C29 1.403(14) . ? 
C28 C35 1.439(14) . ? 
C29 C30 1.470(14) . ? 
C30 C31 1.406(14) . ? 
C31 C32 1.410(15) . ? 
C31 C36 1.442(15) . ? 
C32 C33 1.366(16) . ? 
C33 C34 1.418(14) . ? 
C35 C36 1.353(15) . ? 
C37 C42 1.388(15) . ? 
C37 C38 1.400(14) . ? 
C38 C39 1.381(15) . ? 
C39 C40 1.375(17) . ? 
C40 C41 1.388(18) . ? 
C41 C42 1.383(16) . ? 
C43 C48 1.368(16) . ? 
C43 C44 1.397(16) . ? 
C44 C45 1.387(16) . ? 
C45 C46 1.378(19) . ? 
C46 C47 1.394(19) . ? 
C47 C48 1.386(17) . ? 
C49 C54 1.386(17) . ? 
C49 C50 1.389(17) . ? 
C50 C51 1.387(18) . ? 
C51 C52 1.35(2) . ? 
C52 C53 1.34(3) . ? 
C53 C54 1.384(19) . ? 
C55 C56 1.397(15) . ? 
C55 C60 1.409(15) . ? 
C56 C57 1.372(16) . ? 
C57 C58 1.397(17) . ? 
C58 C59 1.386(19) . ? 
C59 C60 1.389(17) . ? 
C61 C62 1.347(16) . ? 
C61 C66 1.396(15) . ? 
C62 C63 1.400(15) . ? 
C63 C64 1.394(18) . ? 
C64 C65 1.370(17) . ? 
C65 C66 1.394(15) . ? 
C67 C68 1.384(15) . ? 
C67 C72 1.392(15) . ? 
C68 C69 1.388(15) . ? 
C69 C70 1.388(16) . ? 
C70 C71 1.382(17) . ? 
C71 C72 1.412(16) . ? 
C73 C74 1.382(16) . ? 
C73 C78 1.425(16) . ? 
C74 C75 1.386(16) . ? 
C75 C76 1.358(19) . ? 
C76 C77 1.385(19) . ? 
C77 C78 1.387(16) . ? 
C79 C80 1.394(15) . ? 
C79 C84 1.406(15) . ? 
C80 C81 1.376(16) . ? 
C81 C82 1.387(16) . ? 
C82 C83 1.391(16) . ? 
C83 C84 1.391(16) . ? 
C85 C90 1.380(15) . ? 
C85 C86 1.394(15) . ? 
C86 C87 1.388(15) . ? 
C87 C88 1.394(18) . ? 
C88 C89 1.387(17) . ? 
C89 C90 1.383(15) . ? 
C91 C96 1.396(14) . ? 
C91 C92 1.402(14) . ? 
C92 C93 1.370(16) . ? 
C93 C94 1.389(16) . ? 
C94 C95 1.359(15) . ? 
C95 C96 1.403(15) . ? 
C97 C98 1.370(15) . ? 
C97 C102 1.399(16) . ? 
C98 C99 1.405(16) . ? 
C99 C100 1.364(18) . ? 
C100 C101 1.400(17) . ? 
C101 C102 1.385(15) . ? 
C103 C104 1.387(16) . ? 
C103 C108 1.399(16) . ? 
C104 C105 1.387(16) . ? 
C105 C106 1.371(17) . ? 
C106 C107 1.352(19) . ? 
C107 C108 1.351(19) . ? 
P7 F4 1.566(9) . ? 
P7 F5 1.587(9) . ? 
P7 F2 1.589(10) . ? 
P7 F6 1.594(9) . ? 
P7 F3 1.597(9) . ? 
P7 F1 1.598(9) . ? 
P8A F10A 1.572(14) . ? 
P8A F12A 1.580(13) . ? 
P8A F8A 1.581(13) . ? 
P8A F11A 1.582(13) . ? 
P8A F9A 1.585(14) . ? 
P8A F7A 1.588(14) . ? 
P8B F10B 1.573(14) . ? 
P8B F8B 1.578(13) . ? 
P8B F12B 1.584(14) . ? 
P8B F7B 1.584(13) . ? 
P8B F9B 1.589(14) . ? 
P8B F11B 1.589(13) . ? 
C1S Cl2 1.713(17) . ? 
C1S Cl3 1.725(15) . ? 
C1S Cl1 1.827(18) . ? 
C2SA Cl5A 1.722(19) . ? 
C2SA Cl6A 1.741(17) . ? 
C2SA Cl4A 1.789(19) . ? 
C2SB Cl5B 1.715(18) . ? 
C2SB Cl6B 1.740(17) . ? 
C2SB Cl4B 1.785(18) . ? 
C3S Cl8 1.728(13) . ? 
C3S Cl9 1.739(14) . ? 
C3S Cl7 1.771(14) . ? 
 
loop_ 
 _geom_angle_atom_site_label_1 
 _geom_angle_atom_site_label_2 
 _geom_angle_atom_site_label_3 
 _geom_angle 
 _geom_angle_site_symmetry_1 
 _geom_angle_site_symmetry_3 
 _geom_angle_publ_flag 
P1 Pt1 P5 122.86(9) . . ? 
P1 Pt1 P3 118.76(9) . . ? 
P5 Pt1 P3 115.41(9) . . ? 
P1 Pt1 Tl1 96.93(6) . . ? 
P5 Pt1 Tl1 94.73(6) . . ? 
P3 Pt1 Tl1 95.49(6) . . ? 
P6 Au1 P2 130.28(10) . . ? 
P6 Au1 P4 112.93(10) . . ? 
P2 Au1 P4 112.02(10) . . ? 
P6 Au1 Tl1 98.09(7) . . ? 
P2 Au1 Tl1 97.65(7) . . ? 
P4 Au1 Tl1 95.56(7) . . ? 
Pt1 Tl1 Au1 172.30(2) . . ? 
C43 P1 C1 104.7(5) . . ? 
C43 P1 C37 103.0(5) . . ? 
C1 P1 C37 102.5(4) . . ? 
C43 P1 Pt1 120.2(4) . . ? 
C1 P1 Pt1 114.3(3) . . ? 
C37 P1 Pt1 110.2(3) . . ? 
C55 P2 C10 103.9(5) . . ? 
C55 P2 C49 104.6(5) . . ? 
C10 P2 C49 103.7(5) . . ? 
C55 P2 Au1 119.8(4) . . ? 
C10 P2 Au1 116.5(3) . . ? 
C49 P2 Au1 106.6(4) . . ? 
C61 P3 C67 102.3(5) . . ? 
C61 P3 C13 103.8(5) . . ? 
C67 P3 C13 101.7(5) . . ? 
C61 P3 Pt1 108.8(3) . . ? 
C67 P3 Pt1 123.3(3) . . ? 
C13 P3 Pt1 114.8(3) . . ? 
C73 P4 C79 103.2(5) . . ? 
C73 P4 C22 104.5(5) . . ? 
C79 P4 C22 102.5(5) . . ? 
C73 P4 Au1 110.2(4) . . ? 
C79 P4 Au1 121.7(4) . . ? 
C22 P4 Au1 113.0(4) . . ? 
C91 P5 C85 104.0(5) . . ? 
C91 P5 C25 102.1(4) . . ? 
C85 P5 C25 102.8(4) . . ? 
C91 P5 Pt1 118.0(3) . . ? 
C85 P5 Pt1 110.2(3) . . ? 
C25 P5 Pt1 117.7(3) . . ? 
C34 P6 C97 105.0(5) . . ? 
C34 P6 C103 101.1(5) . . ? 
C97 P6 C103 104.0(5) . . ? 
C34 P6 Au1 112.3(3) . . ? 
C97 P6 Au1 109.4(3) . . ? 
C103 P6 Au1 123.3(4) . . ? 
C1 N1 C5 117.7(9) . . ? 
C10 N2 C6 118.2(9) . . ? 
C13 N3 C17 118.0(9) . . ? 
C22 N4 C18 118.6(9) . . ? 
C25 N5 C29 118.1(9) . . ? 
C34 N6 C30 118.4(8) . . ? 
N1 C1 C2 123.2(10) . . ? 
N1 C1 P1 114.3(7) . . ? 
C2 C1 P1 122.4(8) . . ? 
C3 C2 C1 118.4(10) . . ? 
C2 C3 C4 120.6(10) . . ? 
C3 C4 C11 123.5(10) . . ? 
C3 C4 C5 116.1(10) . . ? 
C11 C4 C5 120.4(10) . . ? 
N1 C5 C4 123.9(9) . . ? 
N1 C5 C6 117.5(9) . . ? 
C4 C5 C6 118.5(9) . . ? 
N2 C6 C7 122.0(10) . . ? 
N2 C6 C5 119.3(9) . . ? 
C7 C6 C5 118.7(9) . . ? 
C8 C7 C6 118.2(10) . . ? 
C8 C7 C12 121.9(10) . . ? 
C6 C7 C12 120.0(10) . . ? 
C9 C8 C7 118.2(10) . . ? 
C8 C9 C10 120.2(11) . . ? 
N2 C10 C9 123.0(10) . . ? 
N2 C10 P2 115.8(7) . . ? 
C9 C10 P2 121.1(8) . . ? 
C12 C11 C4 121.6(10) . . ? 
C11 C12 C7 120.6(9) . . ? 
N3 C13 C14 124.5(10) . . ? 
N3 C13 P3 115.1(7) . . ? 
C14 C13 P3 120.4(8) . . ? 
C15 C14 C13 118.0(10) . . ? 
C14 C15 C16 119.6(10) . . ? 
C15 C16 C17 118.2(10) . . ? 
C15 C16 C23 121.3(10) . . ? 
C17 C16 C23 120.5(10) . . ? 
N3 C17 C16 121.6(10) . . ? 
N3 C17 C18 119.4(9) . . ? 
C16 C17 C18 118.9(10) . . ? 
N4 C18 C19 121.8(9) . . ? 
N4 C18 C17 120.4(9) . . ? 
C19 C18 C17 117.8(10) . . ? 
C20 C19 C18 118.5(10) . . ? 
C20 C19 C24 120.4(10) . . ? 
C18 C19 C24 121.1(10) . . ? 
C21 C20 C19 119.3(10) . . ? 
C20 C21 C22 118.8(10) . . ? 
N4 C22 C21 122.9(10) . . ? 
N4 C22 P4 115.8(8) . . ? 
C21 C22 P4 121.3(8) . . ? 
C24 C23 C16 120.9(10) . . ? 
C23 C24 C19 120.7(10) . . ? 
N5 C25 C26 122.8(9) . . ? 
N5 C25 P5 116.8(7) . . ? 
C26 C25 P5 120.4(7) . . ? 
C27 C26 C25 119.2(9) . . ? 
C26 C27 C28 119.1(9) . . ? 
C29 C28 C27 117.9(9) . . ? 
C29 C28 C35 121.8(9) . . ? 
C27 C28 C35 120.4(9) . . ? 
N5 C29 C28 122.9(9) . . ? 
N5 C29 C30 119.4(9) . . ? 
C28 C29 C30 117.7(9) . . ? 
N6 C30 C31 122.2(9) . . ? 
N6 C30 C29 119.0(9) . . ? 
C31 C30 C29 118.8(10) . . ? 
C30 C31 C32 118.2(10) . . ? 
C30 C31 C36 121.3(10) . . ? 
C32 C31 C36 120.5(10) . . ? 
C33 C32 C31 119.4(10) . . ? 
C32 C33 C34 118.0(9) . . ? 
N6 C34 C33 123.8(9) . . ? 
N6 C34 P6 114.0(7) . . ? 
C33 C34 P6 122.2(7) . . ? 
C36 C35 C28 120.5(10) . . ? 
C35 C36 C31 119.9(9) . . ? 
C42 C37 C38 118.6(10) . . ? 
C42 C37 P1 122.8(8) . . ? 
C38 C37 P1 118.5(8) . . ? 
C39 C38 C37 120.8(10) . . ? 
C40 C39 C38 119.9(11) . . ? 
C39 C40 C41 120.1(11) . . ? 
C42 C41 C40 120.2(11) . . ? 
C41 C42 C37 120.4(11) . . ? 
C48 C43 C44 118.5(10) . . ? 
C48 C43 P1 124.6(9) . . ? 
C44 C43 P1 116.9(8) . . ? 
C45 C44 C43 120.7(12) . . ? 
C46 C45 C44 120.3(12) . . ? 
C45 C46 C47 119.1(11) . . ? 
C48 C47 C46 120.0(12) . . ? 
C43 C48 C47 121.4(13) . . ? 
C54 C49 C50 118.0(11) . . ? 
C54 C49 P2 124.0(10) . . ? 
C50 C49 P2 117.8(9) . . ? 
C51 C50 C49 120.2(13) . . ? 
C52 C51 C50 120.2(14) . . ? 
C53 C52 C51 120.5(13) . . ? 
C52 C53 C54 121.1(15) . . ? 
C53 C54 C49 119.8(15) . . ? 
C56 C55 C60 118.6(10) . . ? 
C56 C55 P2 120.0(8) . . ? 
C60 C55 P2 121.3(9) . . ? 
C57 C56 C55 121.5(10) . . ? 
C56 C57 C58 119.3(12) . . ? 
C59 C58 C57 120.6(12) . . ? 
C58 C59 C60 119.9(12) . . ? 
C59 C60 C55 120.1(12) . . ? 
C62 C61 C66 117.4(10) . . ? 
C62 C61 P3 124.7(8) . . ? 
C66 C61 P3 117.9(8) . . ? 
C61 C62 C63 123.4(11) . . ? 
C64 C63 C62 117.7(11) . . ? 
C65 C64 C63 120.8(11) . . ? 
C64 C65 C66 119.0(11) . . ? 
C65 C66 C61 121.6(10) . . ? 
C68 C67 C72 119.4(10) . . ? 
C68 C67 P3 118.9(8) . . ? 
C72 C67 P3 121.8(8) . . ? 
C67 C68 C69 120.6(10) . . ? 
C70 C69 C68 121.1(11) . . ? 
C71 C70 C69 118.5(11) . . ? 
C70 C71 C72 121.1(11) . . ? 
C67 C72 C71 119.4(11) . . ? 
C74 C73 C78 116.7(10) . . ? 
C74 C73 P4 120.0(9) . . ? 
C78 C73 P4 123.2(9) . . ? 
C73 C74 C75 121.8(12) . . ? 
C76 C75 C74 121.2(13) . . ? 
C75 C76 C77 119.0(11) . . ? 
C76 C77 C78 120.9(11) . . ? 
C77 C78 C73 120.3(12) . . ? 
C80 C79 C84 118.3(10) . . ? 
C80 C79 P4 121.9(8) . . ? 
C84 C79 P4 119.7(8) . . ? 
C81 C80 C79 121.1(10) . . ? 
C80 C81 C82 121.0(10) . . ? 
C81 C82 C83 118.5(10) . . ? 
C84 C83 C82 121.1(10) . . ? 
C83 C84 C79 120.0(11) . . ? 
C90 C85 C86 119.2(9) . . ? 
C90 C85 P5 117.9(8) . . ? 
C86 C85 P5 122.9(8) . . ? 
C87 C86 C85 119.2(10) . . ? 
C86 C87 C88 121.2(11) . . ? 
C89 C88 C87 119.1(10) . . ? 
C90 C89 C88 119.6(11) . . ? 
C85 C90 C89 121.6(11) . . ? 
C96 C91 C92 117.9(9) . . ? 
C96 C91 P5 120.9(8) . . ? 
C92 C91 P5 120.8(8) . . ? 
C93 C92 C91 120.8(10) . . ? 
C92 C93 C94 121.0(10) . . ? 
C95 C94 C93 119.1(10) . . ? 
C94 C95 C96 121.0(10) . . ? 
C91 C96 C95 120.1(10) . . ? 
C98 C97 C102 118.7(10) . . ? 
C98 C97 P6 123.5(9) . . ? 
C102 C97 P6 117.6(8) . . ? 
C97 C98 C99 120.7(11) . . ? 
C100 C99 C98 120.5(12) . . ? 
C99 C100 C101 119.6(10) . . ? 
C102 C101 C100 119.7(11) . . ? 
C101 C102 C97 120.8(11) . . ? 
C104 C103 C108 118.8(11) . . ? 
C104 C103 P6 120.8(8) . . ? 
C108 C103 P6 120.4(9) . . ? 
C105 C104 C103 119.1(10) . . ? 
C106 C105 C104 120.1(11) . . ? 
C107 C106 C105 120.8(12) . . ? 
C108 C107 C106 120.3(12) . . ? 
C107 C108 C103 120.8(12) . . ? 
F4 P7 F5 90.6(6) . . ? 
F4 P7 F2 89.9(6) . . ? 
F5 P7 F2 179.4(6) . . ? 
F4 P7 F6 90.5(6) . . ? 
F5 P7 F6 90.7(5) . . ? 
F2 P7 F6 88.9(6) . . ? 
F4 P7 F3 89.1(5) . . ? 
F5 P7 F3 89.4(6) . . ? 
F2 P7 F3 90.9(6) . . ? 
F6 P7 F3 179.6(7) . . ? 
F4 P7 F1 176.7(7) . . ? 
F5 P7 F1 86.6(7) . . ? 
F2 P7 F1 92.9(7) . . ? 
F6 P7 F1 91.3(6) . . ? 
F3 P7 F1 89.1(6) . . ? 
F10A P8A F12A 90.4(11) . . ? 
F10A P8A F8A 89.5(12) . . ? 
F12A P8A F8A 90.4(11) . . ? 
F10A P8A F11A 90.6(11) . . ? 
F12A P8A F11A 89.0(9) . . ? 
F8A P8A F11A 179.3(13) . . ? 
F10A P8A F9A 89.7(12) . . ? 
F12A P8A F9A 179.7(13) . . ? 
F8A P8A F9A 90.0(11) . . ? 
F11A P8A F9A 90.7(10) . . ? 
F10A P8A F7A 178.3(14) . . ? 
F12A P8A F7A 90.8(11) . . ? 
F8A P8A F7A 91.7(11) . . ? 
F11A P8A F7A 88.2(9) . . ? 
F9A P8A F7A 89.1(10) . . ? 
F10B P8B F8B 90.3(10) . . ? 
F10B P8B F12B 90.0(11) . . ? 
F8B P8B F12B 89.0(12) . . ? 
F10B P8B F7B 176.7(12) . . ? 
F8B P8B F7B 91.1(11) . . ? 
F12B P8B F7B 92.9(12) . . ? 
F10B P8B F9B 86.7(10) . . ? 
F8B P8B F9B 92.1(11) . . ? 
F12B P8B F9B 176.5(11) . . ? 
F7B P8B F9B 90.3(10) . . ? 
F10B P8B F11B 90.0(10) . . ? 
F8B P8B F11B 178.0(13) . . ? 
F12B P8B F11B 88.9(10) . . ? 
F7B P8B F11B 88.6(10) . . ? 
F9B P8B F11B 89.9(9) . . ? 
Cl2 C1S Cl3 113.0(11) . . ? 
Cl2 C1S Cl1 108.5(11) . . ? 
Cl3 C1S Cl1 111.3(11) . . ? 
Cl5A C2SA Cl6A 110.5(15) . . ? 
Cl5A C2SA Cl4A 108.2(17) . . ? 
Cl6A C2SA Cl4A 110.0(14) . . ? 
Cl5B C2SB Cl6B 113.0(13) . . ? 
Cl5B C2SB Cl4B 111.0(14) . . ? 
Cl6B C2SB Cl4B 110.0(12) . . ? 
Cl8 C3S Cl9 110.3(8) . . ? 
Cl8 C3S Cl7 112.5(8) . . ? 
Cl9 C3S Cl7 109.2(7) . . ? 
 
loop_ 
 _geom_torsion_atom_site_label_1 
 _geom_torsion_atom_site_label_2 
 _geom_torsion_atom_site_label_3 
 _geom_torsion_atom_site_label_4 
 _geom_torsion 
 _geom_torsion_site_symmetry_1 
 _geom_torsion_site_symmetry_2 
 _geom_torsion_site_symmetry_3 
 _geom_torsion_site_symmetry_4 
 _geom_torsion_publ_flag 
P1 Pt1 Tl1 Au1 -25.88(19) . . . . ? 
P5 Pt1 Tl1 Au1 -149.83(19) . . . . ? 
P3 Pt1 Tl1 Au1 94.03(19) . . . . ? 
P6 Au1 Tl1 Pt1 57.14(19) . . . . ? 
P2 Au1 Tl1 Pt1 -75.55(19) . . . . ? 
P4 Au1 Tl1 Pt1 171.30(19) . . . . ? 
P5 Pt1 P1 C43 38.1(4) . . . . ? 
P3 Pt1 P1 C43 -162.3(4) . . . . ? 
Tl1 Pt1 P1 C43 -62.1(4) . . . . ? 
P5 Pt1 P1 C1 163.9(3) . . . . ? 
P3 Pt1 P1 C1 -36.5(4) . . . . ? 
Tl1 Pt1 P1 C1 63.7(3) . . . . ? 
P5 Pt1 P1 C37 -81.3(4) . . . . ? 
P3 Pt1 P1 C37 78.3(4) . . . . ? 
Tl1 Pt1 P1 C37 178.5(3) . . . . ? 
P6 Au1 P2 C55 -179.0(4) . . . . ? 
P4 Au1 P2 C55 27.7(4) . . . . ? 
Tl1 Au1 P2 C55 -71.5(4) . . . . ? 
P6 Au1 P2 C10 -52.4(4) . . . . ? 
P4 Au1 P2 C10 154.3(4) . . . . ? 
Tl1 Au1 P2 C10 55.1(4) . . . . ? 
P6 Au1 P2 C49 62.7(4) . . . . ? 
P4 Au1 P2 C49 -90.6(4) . . . . ? 
Tl1 Au1 P2 C49 170.2(4) . . . . ? 
P1 Pt1 P3 C61 -87.3(4) . . . . ? 
P5 Pt1 P3 C61 73.8(4) . . . . ? 
Tl1 Pt1 P3 C61 171.7(4) . . . . ? 
P1 Pt1 P3 C67 32.2(4) . . . . ? 
P5 Pt1 P3 C67 -166.7(4) . . . . ? 
Tl1 Pt1 P3 C67 -68.8(4) . . . . ? 
P1 Pt1 P3 C13 156.9(4) . . . . ? 
P5 Pt1 P3 C13 -42.0(4) . . . . ? 
Tl1 Pt1 P3 C13 55.9(4) . . . . ? 
P6 Au1 P4 C73 -85.5(4) . . . . ? 
P2 Au1 P4 C73 72.7(4) . . . . ? 
Tl1 Au1 P4 C73 173.2(4) . . . . ? 
P6 Au1 P4 C79 35.4(4) . . . . ? 
P2 Au1 P4 C79 -166.4(4) . . . . ? 
Tl1 Au1 P4 C79 -65.8(4) . . . . ? 
P6 Au1 P4 C22 158.0(4) . . . . ? 
P2 Au1 P4 C22 -43.8(4) . . . . ? 
Tl1 Au1 P4 C22 56.8(4) . . . . ? 
P1 Pt1 P5 C91 -171.1(4) . . . . ? 
P3 Pt1 P5 C91 28.7(4) . . . . ? 
Tl1 Pt1 P5 C91 -69.7(4) . . . . ? 
P1 Pt1 P5 C85 69.7(4) . . . . ? 
P3 Pt1 P5 C85 -90.6(4) . . . . ? 
Tl1 Pt1 P5 C85 171.1(3) . . . . ? 
P1 Pt1 P5 C25 -47.8(4) . . . . ? 
P3 Pt1 P5 C25 152.0(3) . . . . ? 
Tl1 Pt1 P5 C25 53.6(4) . . . . ? 
P2 Au1 P6 C34 170.2(3) . . . . ? 
P4 Au1 P6 C34 -36.6(4) . . . . ? 
Tl1 Au1 P6 C34 62.9(3) . . . . ? 
P2 Au1 P6 C97 -73.6(4) . . . . ? 
P4 Au1 P6 C97 79.6(4) . . . . ? 
Tl1 Au1 P6 C97 179.1(4) . . . . ? 
P2 Au1 P6 C103 49.0(4) . . . . ? 
P4 Au1 P6 C103 -157.9(4) . . . . ? 
Tl1 Au1 P6 C103 -58.3(4) . . . . ? 
C5 N1 C1 C2 -2.2(14) . . . . ? 
C5 N1 C1 P1 173.4(7) . . . . ? 
C43 P1 C1 N1 99.4(8) . . . . ? 
C37 P1 C1 N1 -153.4(7) . . . . ? 
Pt1 P1 C1 N1 -34.1(8) . . . . ? 
C43 P1 C1 C2 -85.0(9) . . . . ? 
C37 P1 C1 C2 22.2(10) . . . . ? 
Pt1 P1 C1 C2 141.5(8) . . . . ? 
N1 C1 C2 C3 2.5(16) . . . . ? 
P1 C1 C2 C3 -172.7(8) . . . . ? 
C1 C2 C3 C4 0.1(16) . . . . ? 
C2 C3 C4 C11 176.7(10) . . . . ? 
C2 C3 C4 C5 -2.6(15) . . . . ? 
C1 N1 C5 C4 -0.7(14) . . . . ? 
C1 N1 C5 C6 -178.6(8) . . . . ? 
C3 C4 C5 N1 3.1(15) . . . . ? 
C11 C4 C5 N1 -176.3(9) . . . . ? 
C3 C4 C5 C6 -179.1(9) . . . . ? 
C11 C4 C5 C6 1.6(14) . . . . ? 
C10 N2 C6 C7 -1.4(14) . . . . ? 
C10 N2 C6 C5 -179.1(9) . . . . ? 
N1 C5 C6 N2 -9.3(13) . . . . ? 
C4 C5 C6 N2 172.7(9) . . . . ? 
N1 C5 C6 C7 172.9(9) . . . . ? 
C4 C5 C6 C7 -5.1(14) . . . . ? 
N2 C6 C7 C8 5.0(15) . . . . ? 
C5 C6 C7 C8 -177.2(9) . . . . ? 
N2 C6 C7 C12 -173.1(9) . . . . ? 
C5 C6 C7 C12 4.7(14) . . . . ? 
C6 C7 C8 C9 -3.5(15) . . . . ? 
C12 C7 C8 C9 174.6(10) . . . . ? 
C7 C8 C9 C10 -1.3(17) . . . . ? 
C6 N2 C10 C9 -3.8(15) . . . . ? 
C6 N2 C10 P2 171.7(7) . . . . ? 
C8 C9 C10 N2 5.2(17) . . . . ? 
C8 C9 C10 P2 -170.0(9) . . . . ? 
C55 P2 C10 N2 112.5(8) . . . . ? 
C49 P2 C10 N2 -138.4(8) . . . . ? 
Au1 P2 C10 N2 -21.7(9) . . . . ? 
C55 P2 C10 C9 -72.0(10) . . . . ? 
C49 P2 C10 C9 37.2(10) . . . . ? 
Au1 P2 C10 C9 153.9(8) . . . . ? 
C3 C4 C11 C12 -176.6(10) . . . . ? 
C5 C4 C11 C12 2.7(16) . . . . ? 
C4 C11 C12 C7 -3.2(16) . . . . ? 
C8 C7 C12 C11 -178.6(10) . . . . ? 
C6 C7 C12 C11 -0.6(15) . . . . ? 
C17 N3 C13 C14 -2.2(16) . . . . ? 
C17 N3 C13 P3 179.5(7) . . . . ? 
C61 P3 C13 N3 -156.0(8) . . . . ? 
C67 P3 C13 N3 98.1(8) . . . . ? 
Pt1 P3 C13 N3 -37.4(9) . . . . ? 
C61 P3 C13 C14 25.7(10) . . . . ? 
C67 P3 C13 C14 -80.3(9) . . . . ? 
Pt1 P3 C13 C14 144.3(8) . . . . ? 
N3 C13 C14 C15 1.9(17) . . . . ? 
P3 C13 C14 C15 -179.9(9) . . . . ? 
C13 C14 C15 C16 0.1(17) . . . . ? 
C14 C15 C16 C17 -1.5(17) . . . . ? 
C14 C15 C16 C23 178.1(11) . . . . ? 
C13 N3 C17 C16 0.6(15) . . . . ? 
C13 N3 C17 C18 -178.9(9) . . . . ? 
C15 C16 C17 N3 1.2(16) . . . . ? 
C23 C16 C17 N3 -178.4(10) . . . . ? 
C15 C16 C17 C18 -179.3(10) . . . . ? 
C23 C16 C17 C18 1.1(16) . . . . ? 
C22 N4 C18 C19 0.1(15) . . . . ? 
C22 N4 C18 C17 -179.9(10) . . . . ? 
N3 C17 C18 N4 -3.6(15) . . . . ? 
C16 C17 C18 N4 176.9(10) . . . . ? 
N3 C17 C18 C19 176.5(9) . . . . ? 
C16 C17 C18 C19 -3.0(15) . . . . ? 
N4 C18 C19 C20 2.4(16) . . . . ? 
C17 C18 C19 C20 -177.7(10) . . . . ? 
N4 C18 C19 C24 -177.0(10) . . . . ? 
C17 C18 C19 C24 2.9(15) . . . . ? 
C18 C19 C20 C21 -2.6(17) . . . . ? 
C24 C19 C20 C21 176.8(11) . . . . ? 
C19 C20 C21 C22 0.4(17) . . . . ? 
C18 N4 C22 C21 -2.4(16) . . . . ? 
C18 N4 C22 P4 176.5(8) . . . . ? 
C20 C21 C22 N4 2.2(18) . . . . ? 
C20 C21 C22 P4 -176.6(9) . . . . ? 
C73 P4 C22 N4 -152.1(8) . . . . ? 
C79 P4 C22 N4 100.5(9) . . . . ? 
Au1 P4 C22 N4 -32.3(9) . . . . ? 
C73 P4 C22 C21 26.8(11) . . . . ? 
C79 P4 C22 C21 -80.7(10) . . . . ? 
Au1 P4 C22 C21 146.6(8) . . . . ? 
C15 C16 C23 C24 -178.5(12) . . . . ? 
C17 C16 C23 C24 1.1(18) . . . . ? 
C16 C23 C24 C19 -1.2(19) . . . . ? 
C20 C19 C24 C23 179.8(11) . . . . ? 
C18 C19 C24 C23 -0.9(18) . . . . ? 
C29 N5 C25 C26 -4.3(14) . . . . ? 
C29 N5 C25 P5 174.4(7) . . . . ? 
C91 P5 C25 N5 101.8(8) . . . . ? 
C85 P5 C25 N5 -150.6(7) . . . . ? 
Pt1 P5 C25 N5 -29.2(8) . . . . ? 
C91 P5 C25 C26 -79.5(8) . . . . ? 
C85 P5 C25 C26 28.1(9) . . . . ? 
Pt1 P5 C25 C26 149.5(7) . . . . ? 
N5 C25 C26 C27 3.3(15) . . . . ? 
P5 C25 C26 C27 -175.4(8) . . . . ? 
C25 C26 C27 C28 0.7(15) . . . . ? 
C26 C27 C28 C29 -3.4(15) . . . . ? 
C26 C27 C28 C35 176.8(10) . . . . ? 
C25 N5 C29 C28 1.3(14) . . . . ? 
C25 N5 C29 C30 -177.8(9) . . . . ? 
C27 C28 C29 N5 2.5(14) . . . . ? 
C35 C28 C29 N5 -177.7(9) . . . . ? 
C27 C28 C29 C30 -178.4(9) . . . . ? 
C35 C28 C29 C30 1.4(14) . . . . ? 
C34 N6 C30 C31 1.1(14) . . . . ? 
C34 N6 C30 C29 -178.0(9) . . . . ? 
N5 C29 C30 N6 -3.4(14) . . . . ? 
C28 C29 C30 N6 177.4(9) . . . . ? 
N5 C29 C30 C31 177.4(9) . . . . ? 
C28 C29 C30 C31 -1.7(14) . . . . ? 
N6 C30 C31 C32 -0.8(16) . . . . ? 
C29 C30 C31 C32 178.3(10) . . . . ? 
N6 C30 C31 C36 -178.6(10) . . . . ? 
C29 C30 C31 C36 0.5(15) . . . . ? 
C30 C31 C32 C33 0.1(17) . . . . ? 
C36 C31 C32 C33 177.9(11) . . . . ? 
C31 C32 C33 C34 0.3(17) . . . . ? 
C30 N6 C34 C33 -0.7(14) . . . . ? 
C30 N6 C34 P6 -177.7(7) . . . . ? 
C32 C33 C34 N6 0.0(16) . . . . ? 
C32 C33 C34 P6 176.8(9) . . . . ? 
C97 P6 C34 N6 -162.5(7) . . . . ? 
C103 P6 C34 N6 89.5(8) . . . . ? 
Au1 P6 C34 N6 -43.7(8) . . . . ? 
C97 P6 C34 C33 20.5(10) . . . . ? 
C103 P6 C34 C33 -87.5(9) . . . . ? 
Au1 P6 C34 C33 139.3(8) . . . . ? 
C29 C28 C35 C36 0.2(16) . . . . ? 
C27 C28 C35 C36 180.0(10) . . . . ? 
C28 C35 C36 C31 -1.5(16) . . . . ? 
C30 C31 C36 C35 1.1(16) . . . . ? 
C32 C31 C36 C35 -176.6(11) . . . . ? 
C43 P1 C37 C42 17.6(10) . . . . ? 
C1 P1 C37 C42 -90.9(10) . . . . ? 
Pt1 P1 C37 C42 147.0(8) . . . . ? 
C43 P1 C37 C38 -161.5(8) . . . . ? 
C1 P1 C37 C38 90.0(9) . . . . ? 
Pt1 P1 C37 C38 -32.1(9) . . . . ? 
C42 C37 C38 C39 -0.3(15) . . . . ? 
P1 C37 C38 C39 178.9(8) . . . . ? 
C37 C38 C39 C40 0.1(16) . . . . ? 
C38 C39 C40 C41 0.3(18) . . . . ? 
C39 C40 C41 C42 -0.5(19) . . . . ? 
C40 C41 C42 C37 0.3(19) . . . . ? 
C38 C37 C42 C41 0.1(17) . . . . ? 
P1 C37 C42 C41 -179.0(9) . . . . ? 
C1 P1 C43 C48 11.0(11) . . . . ? 
C37 P1 C43 C48 -95.9(10) . . . . ? 
Pt1 P1 C43 C48 141.2(9) . . . . ? 
C1 P1 C43 C44 -171.4(8) . . . . ? 
C37 P1 C43 C44 81.8(9) . . . . ? 
Pt1 P1 C43 C44 -41.2(10) . . . . ? 
C48 C43 C44 C45 -1.7(17) . . . . ? 
P1 C43 C44 C45 -179.5(9) . . . . ? 
C43 C44 C45 C46 2.0(18) . . . . ? 
C44 C45 C46 C47 -1.3(19) . . . . ? 
C45 C46 C47 C48 0(2) . . . . ? 
C44 C43 C48 C47 0.8(18) . . . . ? 
P1 C43 C48 C47 178.4(10) . . . . ? 
C46 C47 C48 C43 0(2) . . . . ? 
C55 P2 C49 C54 8.0(12) . . . . ? 
C10 P2 C49 C54 -100.6(11) . . . . ? 
Au1 P2 C49 C54 135.9(10) . . . . ? 
C55 P2 C49 C50 -167.2(9) . . . . ? 
C10 P2 C49 C50 84.2(10) . . . . ? 
Au1 P2 C49 C50 -39.3(10) . . . . ? 
C54 C49 C50 C51 -3.1(18) . . . . ? 
P2 C49 C50 C51 172.4(9) . . . . ? 
C49 C50 C51 C52 -1(2) . . . . ? 
C50 C51 C52 C53 4(2) . . . . ? 
C51 C52 C53 C54 -2(2) . . . . ? 
C52 C53 C54 C49 -2(2) . . . . ? 
C50 C49 C54 C53 4.5(19) . . . . ? 
P2 C49 C54 C53 -170.7(10) . . . . ? 
C10 P2 C55 C56 167.5(9) . . . . ? 
C49 P2 C55 C56 59.1(10) . . . . ? 
Au1 P2 C55 C56 -60.2(10) . . . . ? 
C10 P2 C55 C60 -16.7(10) . . . . ? 
C49 P2 C55 C60 -125.2(10) . . . . ? 
Au1 P2 C55 C60 115.5(9) . . . . ? 
C60 C55 C56 C57 4.0(17) . . . . ? 
P2 C55 C56 C57 179.8(9) . . . . ? 
C55 C56 C57 C58 -3.9(18) . . . . ? 
C56 C57 C58 C59 2(2) . . . . ? 
C57 C58 C59 C60 1(2) . . . . ? 
C58 C59 C60 C55 0(2) . . . . ? 
C56 C55 C60 C59 -1.8(17) . . . . ? 
P2 C55 C60 C59 -177.6(10) . . . . ? 
C67 P3 C61 C62 17.9(11) . . . . ? 
C13 P3 C61 C62 -87.6(10) . . . . ? 
Pt1 P3 C61 C62 149.7(9) . . . . ? 
C67 P3 C61 C66 -162.7(8) . . . . ? 
C13 P3 C61 C66 91.8(9) . . . . ? 
Pt1 P3 C61 C66 -30.9(9) . . . . ? 
C66 C61 C62 C63 0.2(18) . . . . ? 
P3 C61 C62 C63 179.6(10) . . . . ? 
C61 C62 C63 C64 0(2) . . . . ? 
C62 C63 C64 C65 1(2) . . . . ? 
C63 C64 C65 C66 -1(2) . . . . ? 
C64 C65 C66 C61 0.6(18) . . . . ? 
C62 C61 C66 C65 -0.3(17) . . . . ? 
P3 C61 C66 C65 -179.7(9) . . . . ? 
C61 P3 C67 C68 63.6(9) . . . . ? 
C13 P3 C67 C68 170.7(8) . . . . ? 
Pt1 P3 C67 C68 -58.9(9) . . . . ? 
C61 P3 C67 C72 -116.2(9) . . . . ? 
C13 P3 C67 C72 -9.1(9) . . . . ? 
Pt1 P3 C67 C72 121.3(8) . . . . ? 
C72 C67 C68 C69 0.5(15) . . . . ? 
P3 C67 C68 C69 -179.3(8) . . . . ? 
C67 C68 C69 C70 -0.4(15) . . . . ? 
C68 C69 C70 C71 -0.9(16) . . . . ? 
C69 C70 C71 C72 2.1(16) . . . . ? 
C68 C67 C72 C71 0.7(15) . . . . ? 
P3 C67 C72 C71 -179.5(8) . . . . ? 
C70 C71 C72 C67 -2.0(16) . . . . ? 
C79 P4 C73 C74 -145.2(9) . . . . ? 
C22 P4 C73 C74 107.8(9) . . . . ? 
Au1 P4 C73 C74 -13.8(10) . . . . ? 
C79 P4 C73 C78 33.4(10) . . . . ? 
C22 P4 C73 C78 -73.5(10) . . . . ? 
Au1 P4 C73 C78 164.9(8) . . . . ? 
C78 C73 C74 C75 2.2(17) . . . . ? 
P4 C73 C74 C75 -179.0(9) . . . . ? 
C73 C74 C75 C76 -1.5(19) . . . . ? 
C74 C75 C76 C77 1.1(19) . . . . ? 
C75 C76 C77 C78 -1.6(19) . . . . ? 
C76 C77 C78 C73 2.5(18) . . . . ? 
C74 C73 C78 C77 -2.7(16) . . . . ? 
P4 C73 C78 C77 178.5(9) . . . . ? 
C73 P4 C79 C80 -131.2(9) . . . . ? 
C22 P4 C79 C80 -22.8(10) . . . . ? 
Au1 P4 C79 C80 104.6(9) . . . . ? 
C73 P4 C79 C84 52.4(10) . . . . ? 
C22 P4 C79 C84 160.8(9) . . . . ? 
Au1 P4 C79 C84 -71.8(10) . . . . ? 
C84 C79 C80 C81 1.2(16) . . . . ? 
P4 C79 C80 C81 -175.3(9) . . . . ? 
C79 C80 C81 C82 -2.6(17) . . . . ? 
C80 C81 C82 C83 2.1(17) . . . . ? 
C81 C82 C83 C84 -0.4(16) . . . . ? 
C82 C83 C84 C79 -1.0(16) . . . . ? 
C80 C79 C84 C83 0.6(16) . . . . ? 
P4 C79 C84 C83 177.2(8) . . . . ? 
C91 P5 C85 C90 -153.2(8) . . . . ? 
C25 P5 C85 C90 100.5(8) . . . . ? 
Pt1 P5 C85 C90 -25.8(9) . . . . ? 
C91 P5 C85 C86 25.8(10) . . . . ? 
C25 P5 C85 C86 -80.4(9) . . . . ? 
Pt1 P5 C85 C86 153.3(8) . . . . ? 
C90 C85 C86 C87 -0.2(16) . . . . ? 
P5 C85 C86 C87 -179.2(8) . . . . ? 
C85 C86 C87 C88 2.6(17) . . . . ? 
C86 C87 C88 C89 -2.9(18) . . . . ? 
C87 C88 C89 C90 0.8(17) . . . . ? 
C86 C85 C90 C89 -1.9(16) . . . . ? 
P5 C85 C90 C89 177.2(8) . . . . ? 
C88 C89 C90 C85 1.6(17) . . . . ? 
C85 P5 C91 C96 53.3(9) . . . . ? 
C25 P5 C91 C96 160.0(9) . . . . ? 
Pt1 P5 C91 C96 -69.2(9) . . . . ? 
C85 P5 C91 C92 -133.9(9) . . . . ? 
C25 P5 C91 C92 -27.2(10) . . . . ? 
Pt1 P5 C91 C92 103.6(9) . . . . ? 
C96 C91 C92 C93 2.6(17) . . . . ? 
P5 C91 C92 C93 -170.4(9) . . . . ? 
C91 C92 C93 C94 -2.9(19) . . . . ? 
C92 C93 C94 C95 0.4(18) . . . . ? 
C93 C94 C95 C96 2.3(18) . . . . ? 
C92 C91 C96 C95 0.1(16) . . . . ? 
P5 C91 C96 C95 173.1(8) . . . . ? 
C94 C95 C96 C91 -2.5(17) . . . . ? 
C34 P6 C97 C98 -117.0(10) . . . . ? 
C103 P6 C97 C98 -11.1(11) . . . . ? 
Au1 P6 C97 C98 122.3(9) . . . . ? 
C34 P6 C97 C102 67.6(10) . . . . ? 
C103 P6 C97 C102 173.4(9) . . . . ? 
Au1 P6 C97 C102 -53.1(9) . . . . ? 
C102 C97 C98 C99 0.7(18) . . . . ? 
P6 C97 C98 C99 -174.7(10) . . . . ? 
C97 C98 C99 C100 0(2) . . . . ? 
C98 C99 C100 C101 -1(2) . . . . ? 
C99 C100 C101 C102 0.8(19) . . . . ? 
C100 C101 C102 C97 0(2) . . . . ? 
C98 C97 C102 C101 -0.6(18) . . . . ? 
P6 C97 C102 C101 175.1(10) . . . . ? 
C34 P6 C103 C104 -129.8(9) . . . . ? 
C97 P6 C103 C104 121.4(9) . . . . ? 
Au1 P6 C103 C104 -3.6(10) . . . . ? 
C34 P6 C103 C108 50.5(10) . . . . ? 
C97 P6 C103 C108 -58.3(10) . . . . ? 
Au1 P6 C103 C108 176.7(8) . . . . ? 
C108 C103 C104 C105 0.6(16) . . . . ? 
P6 C103 C104 C105 -179.1(8) . . . . ? 
C103 C104 C105 C106 0.4(16) . . . . ? 
C104 C105 C106 C107 -1.1(18) . . . . ? 
C105 C106 C107 C108 1(2) . . . . ? 
C106 C107 C108 C103 0(2) . . . . ? 
C104 C103 C108 C107 -1.0(18) . . . . ? 
P6 C103 C108 C107 178.8(10) . . . . ? 
 
_diffrn_measured_fraction_theta_max    0.999 
_diffrn_reflns_theta_full              25.00 
_diffrn_measured_fraction_theta_full   0.999 
_refine_diff_density_max    3.387 
_refine_diff_density_min   -2.463 
_refine_diff_density_rms    0.196 
